# Supplementary material for: A Large-Scale Genome-wide Association Study of Blood Pressure Accounting for Gene-Depressive Symptomatology Interactions in 564,680 Individuals from Diverse Populations
Source: Research Square preprint supplement (doi:10.21203/rs.3.rs-6025759/v1), 2025-02-17
Supplement: Supplementary file 1 [file 7ff384a508cd3ed29d284c65.xlsx]

## Sheet: Table S1
Table S1. Descriptive statsitics in the total sample and within each group stratified by dDEPR status
Study Name	Population	Traits	dDEPR = 1 (E1)							dDEPR = 0 (E0)							Total study population (irrespective of E)
			N	Mean	SD	Median	Min.	Max.		N	Mean	SD	Median	Min.	Max.		N	Mean	SD	Median	Min.	Max.
AGES hu370CNV	EUR	Sex (men)	74							1100							1174
		Medication	136							1650							1786
		Hypertension	159							2103							2262
		Age (years)	203	77.0197	6.00739	76	67	95		2593	76.4462	5.38132	76	66	95		2796	76.4878	5.43008	76	66	95
		SBP	203	152.468	26.5675	149	94	231		2593	152.276	21.8658	151	94	268		2796	152.29	22.2351	151	94	268
		DBP	203	80.6831	12.6726	80	29	144.676		2593	80.457	10.4007	80	39	130		2796	80.4734	10.5796	80	29	144.676
		PP	203	71.734	20.5705	70	19	132		2593	71.8187	18.5118	70	22	173		2796	71.8126	18.6649	70	19	173
AGES gsa	EUR	Sex (men)	80							981							1061
		Medication	151							1459							1610
		Hypertension	188							1848							2036
		Age (years)	226	79.0487	6.41265	79	67	96		2265	77.1841	5.98527	77	66	96		2491	77.3533	6.04771	77	66	96
		SBP	226	151.354	24.0009	149	105	253		2265	152.041	22.8658	150	92	264		2491	151.978	22.9669	150	92	264
		DBP	226	79.5354	11.5324	79	39	113		2265	79.9638	10.8512	80	32	123		2491	79.9249	10.913	80	32	123
		PP	226	71.8186	20.2578	70	34	157		2265	72.0768	19.0565	70	25	152		2491	72.0534	19.1645	70	25	157
ARIC	AFR	Sex (men)	25	NA	NA	NA	NA	NA		337	NA	NA	NA	NA	NA		362	NA	NA	NA	NA	NA
		Medication	104	NA	NA	NA	NA	NA		879	NA	NA	NA	NA	NA		983	NA	NA	NA	NA	NA
		Hypertension	103	NA	NA	NA	NA	NA		879	NA	NA	NA	NA	NA		982	NA	NA	NA	NA	NA
		Age (years)	118	75.18	5.08	74	68	89		995	75.05	5.12	74	67	89		1113	75.07	5.11	74	67	89
		SBP	118	149.07	21.02	147.5	96.5	204.5		995	148.46	20.55	146.5	95	227		1113	148.53	20.59	147	95	227
		DBP	118	78.96	11.37	78.75	48	118		995	78.31	11.03	78	44.5	119		1113	78.38	11.06	78	44.5	119
		PP	118	70.11	15.94	68.25	38	117		995	70.15	16.51	68	27	135.5		1113	70.15	16.44	68	27	135.5
ARIC	EUR	Sex (men)	80	NA	NA	NA	NA	NA		1717	NA	NA	NA	NA	NA		1797	NA	NA	NA	NA	NA
		Medication	179	NA	NA	NA	NA	NA		2756	NA	NA	NA	NA	NA		2935	NA	NA	NA	NA	NA
		Hypertension	172	NA	NA	NA	NA	NA		2686	NA	NA	NA	NA	NA		2858	NA	NA	NA	NA	NA
		Age (years)	230	76.82	5.84	76	67	90		3832	75.96	5.19	75	66	90		4062	76.01	5.23	75	66	90
		SBP	230	140.7	18.68	141	93.5	205		3832	139.88	19.17	139	81	216		4062	139.93	19.14	139	81	216
		DBP	230	72.22	10.58	71.25	42	103		3832	72.52	11.13	72	37	129		4062	72.5	11.1	72	37	129
		PP	230	68.48	15.15	67.25	37	122.5		3832	67.36	14.91	65.5	12	144.5		4062	67.43	14.92	65.5	12	144.5
ASPREE	EUR	Sex (men)	179							5246							5425
		Medication	27							548							575
		Hypertension	412							8759							9171
		Age (years)	535	75.0303	4.02405	74.1	70.1	89.3		11496	75.0631	4.23586	73.9	70	96		12301	75.0617	4.22651	73.9	70	96
		SBP	535	140.357	17.1456	139	93	187		11496	140.211	16.7527	140	76	194		12301	140.217	16.7697	140	76	194
		DBP	535	78.0991	10.5246	79	48	104		11496	77.6684	10.151	77	41	114		12301	77.6876	10.1678	77	41	114
		PP	535	62.2579	13.7997	62	25	114		11496	62.5425	13.7579	62	23	121		12301	62.5298	13.7593	62	23	121
ASPS	EUR	Sex (men)	23							314							337
		Medication	28							239							267
		Hypertension	47							484							531
		Age (years)	79	65.57	8.39	65	50	82		698	65.1	7.86	64.5	46	84		777	65.15	7.91	65	46	84
		SBP	79	145.3	28.88	143.3	103.3	221.7		698	148.89	25.78	145	86.67	235		777	148.53	26.11	145	86.67	235
		DBP	79	90.65	12.43	90	60	123.33		698	90.81	12.33	90	63.33	130		777	90.79	12.33	90	60	130
		PP	79	54.64	19.33	53.33	23.33	115		698	58.08	17.67	56.67	18.33	121.67		777	57.73	17.86	56.67	18.33	121.67
ASPS-Fam	EUR	Sex (men)	8							131							139
		Medication	11							146							157
		Hypertension	17							231							248
		Age (years)	26	66.73	9.4	69.5	47	79		321	64.57	10.67	68	38	84		347	64.73	10.58	68	38	84
		SBP	26	143.73	29.07	141.5	80	195		321	146.33	24.99	145	90	243		347	146.13	25.28	145	80	243
		DBP	26	89.23	13.54	84	60	120		321	91.56	10.88	90	60	120		347	91.39	11.09	90	60	120
		PP	26	54.5	20.8	53.5	20	89		321	54.76	18.71	53	10	133		347	54.74	18.84	53	10	133
BBJ+Fujita	EAS	Sex (men)	626							5278							5904
		Medication	610							4995							5605
		Hypertension	610							4995							5605
		Age (years)	1510	59.1768	14.6211	61	20	98		9788	62.9862	13.713	65	18	98		11298	62.4771	13.8984	65	18	98
		SBP	1510	136.979	23.2503	135	81	226		9788	145.135	25.8442	145	70	277.034		11298	144.045	25.6633	142	70	277.034
		DBP	1510	82.9868	15.0511	81.5	43	150		9788	85.9711	15.9105	86	38	160		11298	85.5723	15.8309	85	38	160
		PP	1510	53.9921	14.5564	52	18	115		9788	59.1632	15.968	60	5	149.115		11298	58.4721	15.8844	58	5	149.115
BES-610	EAS	Sex (men)	1							198							199
		Medication	4							229							233
		Hypertension	4							229							233
		Age (years)	9	63	5	63	59	73		576	63	9	61	50	90		585	63	9	61	50	90
		SBP	9	146	26	144	115	195		576	139	25	137	84	231		585	139	25	137	84	231
		DBP	9	78	17	78	56	110		576	76	14	75	38	128		585	76	14	75	38	128
		PP	9	68	16	65	41	96		576	63	16	61	30	117		585	63	16	61	30	117
BES-omni	EAS	Sex (men)	2							231							233
		Medication	1							251							252
		Hypertension	1							251							252
		Age (years)	2	72	10	72	65	79		555	66	10	67	50	93		557	66	10	67	50	93
		SBP	2	118	22	118	102	133		555	135	22	133	85	217		557	135	22	133	85	217
		DBP	2	66	13	66	56	75		555	73	13	72	44	126		557	73	13	72	44	126
		PP	2	52	8	52	46	58		555	62	15	60	26	127		557	62	15	60	26	127
BHS	EUR	Sex (men)	38							142							180
		Medication	44							89							133
		Hypertension	54							117							171
		Age (years)	125	49.9185	4.13042	50.62	38	57		313	49	4.4	50	36	57		438	49	4.3	50	36	57
		SBP	125	125.621	17.2524	125.33	84	211		313	125	15.5	124	87	179		438	125	16	124	84	211
		DBP	125	80.4426	11.0852	80	53	127		313	79	10.7	79	56	115		438	80	10.8	80	53	127
		PP	125	45.179	9.83031	44.67	26	84		313	45	8.9	44	22	82		438	45	9.1	44	22	84
BHS	AFR	Sex (men)	19							32							51
		Medication	43							61							104
		Hypertension	52							74							126
		Age (years)	68	48.8	5	50.53	38.11	56		121	48.92	4.67	50.31	38.2	55.9		189	48.89	4.8	50.43	38.1	56
		SBP	68	141.8	23.88	136.83	96.33	215		121	132.49	20.83	130.33	89	186.7		189	135.8	22.4	133	89	215
		DBP	68	91.2	13.38	91.84	59	125		121	84.99	12.82	83.33	57	126.7		189	87.22	13.3	85.67	57	127
		PP	68	50.6	13.97	48	28.66	105		121	47.5	11.78	46.67	22.3	84.3		189	48.62	12.7	47	22.3	105
BIOVU-ICD	AFR	Total N	323							4350							4673
		Sex (men)	86							1612							1698
		Medication	57							120							177
		Hypertension	224							2349							2573
		Age (years)	323	50.2755	18.3033	50.4	18	88.7		4350	47.598	17.6263	48	18	89.9		4673	47.7831	17.685	48.2	18	89.9
		DAYS	323	42.6409	92.3855	0	0	364		4350	0	0	0	0	0		4673	2.94736	26.5568	0	0	364
		SBP	323	132.885	19.1725	131	90	189		4350	129.546	19.422	128	60	239		4673	129.777	19.4213	128	60	239
		DBP	323	77.6966	12.5945	77	42	115		4350	76.9855	12.6763	77	22	136		4673	77.0347	12.6706	77	22	136
		PP	323	55.1889	15.807	53	23	110		4350	52.5607	16.0811	50	5	148		4673	52.7423	16.0745	50	5	148
BIOVU-ICD	EUR	Total N	1719							18019							19738
		Sex (men)	581							7565							8146
		Medication	277							542							819
		Hypertension	1194							9967							11161
		Age (years)	1719	59.4702	16.9905	63	18.1	89.9		18019	57.0836	17.6157	59.6	18	90		19738	57.2915	17.5746	59.9	18	90
		DAYS	1719	39.559	86.1143	0	0	365		18019	0	0	0	0	0		19738	3.44523	27.7475	0	0	365
		SBP	1719	129.856	18.6898	128	80	201		18019	127.426	18.4853	126	64	238.733		19738	127.638	18.5154	126	64	238.733
		DBP	1719	74.9988	13.0117	74	35	125		18019	74.1062	11.9537	74	21	141		19738	74.1839	12.0518	74	21	141
		PP	1719	54.8575	16.2151	53	12	141		18019	53.3203	16.3723	51	9	151		19738	53.4541	16.364	51	9	151
BIOVU-PHQ2	AFR	Total N	21							189							210
		Sex (men)	3							57							60
		Medication	1							2							3
		Hypertension	16							148							164
		Age (years)	21	53.9476	11.8987	55.9	30.6	73.5		189	55.8238	14.9458	56.7	19.8	86.1		210	55.6362	14.656	56.7	19.8	86.1
		DAYS	21	6.28571	19.1446	0	0	70		189	2.72487	16.54	0	0	168		210	3.08095	16.8019	0	0	168
		SBP	21	135.333	21.5438	133	104	182		189	129.079	19.8596	130	81	206		210	129.705	20.068	130	81	206
		DBP	21	79.381	12.8626	75	64	109		189	75.5026	13.9221	76	35	112		210	75.8905	13.8399	76	35	112
		PP	21	55.9524	21.0154	52	23	108		189	53.5767	16.0588	51	20	100		210	53.8143	16.5754	51	20	108
BIOVU-PHQ2	EUR	Total N	127							1138							1265
		Sex (men)	52							511							563
		Medication	1							11							12
		Hypertension	91							737							828
		Age (years)	127	60.9087	14.7537	62.6	25	89.4		1138	61.8467	13.4148	63.2	20.1	89.5		1265	61.7526	13.5519	63.1	20.1	89.5
		DAYS	127	3.77165	19.3687	0	0	183		1138	5.35237	23.9075	0	0	244		1265	5.19368	23.4896	0	0	244
		SBP	127	124.252	18.7523	124	81	210		1138	126.494	16.3439	126	84	214		1265	126.269	16.607	126	81	214
		DBP	127	71.2913	12.8422	70	30	101		1138	72.6678	10.8822	72	42	111		1265	72.5296	11.0966	72	30	111
		PP	127	52.9606	19.5949	50	22	148		1138	53.826	15.5329	52	18	125		1265	53.7391	15.9803	52	18	148
BIOVU-PHQ8	AFR	Total N	33							291							324
		Sex (men)	8							61							69
		Medication	0							6							6
		Hypertension	20							181							201
		Age (years)	33	45.3636	14.3145	43.9	19.9	68.8		291	49.1873	15.4148	49.5	19	86.8		324	48.7978	15.3291	48.95	19	86.8
		DAYS	33	4.75758	12.0209	0	0	50		291	14.5876	47.0672	0	0	352		324	13.5864	44.8573	0	0	352
		SBP	33	129	18.2089	128	100	169		291	130.677	16.7585	130	72	183		324	130.506	16.8896	130	72	183
		DBP	33	76.9394	12.0518	75	55	103		291	77.2027	11.5602	77	24	108		324	77.1759	11.5923	77	24	108
		PP	33	52.0606	13.1314	53	30	89		291	53.4742	15.5364	50	11	131		324	53.3302	15.2966	51	11	131
BIOVU-PHQ8	EUR	Total N	190							1703							1893
		Sex (men)	50							460							510
		Medication	4							15							19
		Hypertension	118							836							954
		Age (years)	190	53.4695	15.8409	55.4	18.5	87.1		1703	54.7494	15.9434	56.4	18.3	90		1893	54.621	15.9336	56.3	18.3	90
		DAYS	190	15.6947	45.44	0	0	272		1703	12.4457	42.814	0	0	364		1893	12.7718	43.0834	0	0	364
		SBP	190	127.753	19.7019	125	80	213		1703	128.071	16.8133	127	78	227		1893	128.039	17.1197	127	78	227
		DBP	190	76.5211	13.2791	75	42	141		1703	75.2501	11.2909	75	34	125		1893	75.3777	11.5084	75	34	141
		PP	190	51.2316	16.4908	48	14	116		1703	52.8156	15.3976	51	17	145.924		1893	52.6566	15.5135	51	14	145.924
CARDIA	AFR	Sex (men)	78							232							310
		Medication	11							11							22
		Hypertension	26							44							70
		Age (years)	246	29.29	3.89	29	22	39		562	29.54	3.8	30	21	40		808	29.46	3.83	30	21	40
		SBP	246	110.2	13.83	108	79	189		562	110.3	12.68	109	79	187		808	110.3	13.03	108	79	189
		DBP	246	71.28	11.74	70	47	139		562	71.29	10.84	71	35	123		808	71.29	11.12	70.5	35	139
		PP	246	38.96	9.23	38	15	69		562	38.98	8.16	38	21	74		808	38.97	8.5	38	15	74
CARDIA	EUR	Sex (men)	104							603							707
		Medication	2							8							10
		Hypertension	13							46							59
		Age (years)	285	30.67	3.43	31	22	37		1230	30.54	3.32	31	22	36		1515	30.56	3.34	31	22	37
		SBP	285	105.3	10.95	104	80	156		1230	105.9	11.13	105	75	166		1515	105.8	11.09	105	75	166
		DBP	285	67.75	9.45	67	47	101		1230	67.81	9.57	67.5	30	110		1515	67.8	9.54	67	30	110
		PP	285	37.59	7.54	37	22	78		1230	38.13	7.99	38	14	78		1515	38.03	7.91	37	14	78
CFS	AFR	Sex (men)	12							39							51
		Medication	10							12							22
		Hypertension	18							30							48
		Age (years)	28	47.1564	13.8255	49.303	19.138	76.575		79	44.3679	16.1825	43.313	18.07	75.63		107	45.0976	15.5854	46.234	18.07	76.575
		SBP	28	134.714	20.7183	132.5	98	182		79	125.633	19.7477	121	52.5	177		107	128.009	20.3072	123.5	52.5	182
		DBP	28	86.1786	9.98352	84.75	70.5	103		79	79.4937	13.4576	79.5	35	120		107	81.243	12.9371	80.5	35	120
		PP	28	48.5357	15.3803	44.75	23	86		79	46.1392	12.5236	45	17.5	94		107	46.7664	13.296	45	17.5	94
CFS	EUR	Sex (men)	41							145							186
		Medication	18							35							53
		Hypertension	28							75							103
		Age (years)	73	45.4418	11.6445	44.895	18.407	71.918		326	47.5024	17.1348	46.3615	18.004	88.668		399	47.1254	16.2762	46.267	18.004	88.668
		SBP	73	128.767	18.5682	124.5	95	182		326	123.054	18.8453	120.5	59.5	210		399	124.099	18.9016	121	59.5	210
		DBP	73	82.0274	13.6842	80.5	54	126		326	76.9095	12.3566	78.25	31	139.5		399	77.8459	12.7468	79	31	139.5
		PP	73	46.7397	9.30543	45	29	71		326	46.1442	13.3971	43	14	118		399	46.2531	12.7389	43	14	118
CHS	EUR	Sex (men)	88							1188							1276
		Medication	136							1024							1160
		Hypertension	178							1538							1716
		Age (years)	336	72.3929	5.45214	71	65	92		2924	72.315	5.37117	71	65	98		3260	72.323	5.37878	71	65	98
		SBP	336	139.65	23.8154	137	83	238		2924	140.555	23.4963	139	79	230		3260	140.462	23.5273	138	79	238
		DBP	336	73.1756	12.9576	73	40	122		2923	74.064	12.4681	74	40	126		3259	73.9724	12.5203	74	40	126
		PP	336	66.4747	18.3235	64	29	142		2923	66.469	18.9393	64	12	145		3259	66.4696	18.874	64	12	145
CHS	AFR	Sex (men)	51							255							306
		Medication	114							402							516
		Hypertension	121							482							603
		Age (years)	170	73.6765	5.92618	73	65	91		652	72.6626	5.59841	71	65	93		822	72.8723	5.67894	72	65	93
		SBP	170	150.892	24.979	146.385	91.77	237		651	151.383	24.9233	149.77	92.77	249.77		821	151.281	24.9204	149.77	91.77	249.77
		DBP	170	80.9024	12.6707	80.72	40	113.44		651	81.5356	12.3707	81	47.44	119.44		821	81.4045	12.4283	81	40	119.44
		PP	170	69.9901	20.8599	67.33	28.33	135		650	69.7542	19.3252	67.83	21.33	158		820	69.8031	19.6403	67.33	21.33	158
FHS	EUR	Sex (men)	264							2998							3262
		Medication	179							1440							1619
		Hypertension	223							1689							1912
		Age (years)	726	51.194	16.021	50	20	95		6414	52.389	15.806	51	19	97		7140	52.267	15.831	51	19	97
		SBP	685	125.634	21.314	120.667	87.333	221.667		6265	125.649	21.009	121.333	223	78		6950	125.648	21.038	121.333	78	223
		DBP	680	77.09	11.253	76	48	123.333		6250	76.503	10.465	76	119.333	43.333		6930	76.561	10.546	76	43.333	123.333
		PP	680	48.472	17.422	43.333	20	147		6250	49.167	16.89	44.667	20	137		6930	49.099	16.943	44.667	20	147
GAPP	EUR	Sex (men)	56							452							508
		Medication	6							10							16
		Hypertension	6							10							16
		Age (years)	174	34.74	5.4868	35.48	25.11	42.17		924	35.74	5.24072	37.3	23.83	44.26		1098	35.58	5.29058	37.05	23.83	44.26
		SBP	174	119.5	14.5643	117.7	84	178.3		924	122.4	13.0297	122	89	186.7		1098	121.9	13.3192	121	84	186.7
		DBP	174	77.54	8.98979	76.67	58.67	112		924	79.26	8.8387	79	56.67	119		1098	78.99	8.88103	78.67	56.67	119
		PP	174	41.94	7.89983	41	25.33	71		924	43.09	7.88837	42.67	19.33	74.67		1098	42.91	7.89779	42.33	19.33	74.67
GENOA	AFR	Sex (men)	13							83							96
		Medication	288							216							72
		Hypertension	315							238							77
		Age (years)	85	67.49	9.62	66.9	31.99	98.12		283	66.19	8.68	65.42	46.16	90.54		368	66.49	8.91	65.79	31.99	98.12
		SBP	85	151.18	24.88	152.5	94	233		283	147.86	22.33	146.5	92.5	235.5		368	148.62	22.95	147	92.5	235.5
		DBP	85	80.67	11.5	80	56.5	108		283	81.53	11.95	80.5	55	124.5		368	81.33	11.84	80.5	55	124.5
		PP	85	70.51	21.46	71	20	143.5		283	66.33	17.33	65.5	29.5	122.5		368	67.29	18.42	67	20	143.5
HCHS/SOL	HIS	Sex (men)	1064							3733							4797
		Medication	666							1208							1874
		Hypertension	1076							2133							3209
		Age (years)	3432	47.91	13.0128	49	18	76		8105	45.3308	14.0822	47	18	75		11537	46.098	13.8226	48	18	76
		SBP	3432	125.573	21.1479	122	81	245.857		8105	124.244	19.7763	121	77	245.857		11537	124.639	20.2023	121	77	245.857
		DBP	3431	75.7281	12.2709	75	45	135		8101	74.5444	11.8513	74	39	130		11532	74.8966	11.9893	74	39	135
		PP	3431	49.8398	14.1645	47	4	130.2		8101	49.7059	13.0412	47	20	130.2		11532	49.7457	13.3847	47	4	130.2
HCS	EUR	Sex (men)	94							829							923
		Medication	7							41							48
		Hypertension	20							173							193
		Age (years)	175	66.589	7.888	65	56	86		1675	66.651	7.484	66	55	86		1850	66.645	7.521	66	55	86
		SBP	175	135.855	19.336	133.333	91	190.666		1675	136.314	18.407	135	93	230.333		1850	136.271	18.492	135	91	230.333
		DBP	175	77.7	11.055	79	49	107.667		1675	78.997	9.783	79.333	43	108.333		1850	78.893	9.912	79.333	43	108.333
		PP	175	57.956	14.786	58	29.667	104.667		1675	57.317	15.024	54.667	0	125.333		1850	57.377	14.999	55	0	125.333
HRS	EUR	Sex (men)	403							4000							4403
		Medication	643							4327							4970
		Hypertension	757							4788							5545
		Age (years)	1211	66.86	11.71	66	31	100		9036	67.48	10.9	68	30	101		10247	67.4	11	67	30	101
		SBP	1211	136.79	22.66	135.33	82	219		9036	137.74	22.71	136.33	72	232.67		10247	137.63	22.7	136	72	232.67
		DBP	1211	84.27	12.89	83.33	50	134		9036	84.15	12.58	83.67	43	147.5		10247	84.16	12.62	83.67	43	147.5
		PP	1211	52.52	15.35	50.33	19.67	129.5		9036	53.59	14.91	51.67	19.67	122.33		10247	53.47	14.96	51.67	19.67	129.5
HRS	AFR	Sex (men)	132							697							829
		Medication	303							1101							1404
		Hypertension	338							1214							1552
		Age (years)	433	62.56	10.21	60	36	94		1781	63.57	10.65	62	28	99		2214	63.37	10.57	62	28	99
		SBP	433	146.19	25.51	144.67	73.33	236		1781	144.9	24.3	143	84.33	232.33		2214	145.15	24.54	143.67	73.33	236
		DBP	433	90.33	14.69	89	53	145.5		1781	89.22	13.72	88.33	54.67	142.67		2214	89.44	13.92	88.33	53	145.5
		PP	433	55.86	16.43	53.33	13.67	124.67		1781	55.67	15.91	53.67	10.33	119		2214	55.71	16.01	53.67	10.33	124.67
HUFS	AFR	Sex (men)	82							294							564
		Medication	83							240							323
		Hypertension	105							287							392
		Age (years)	276	44.18	12.17	44	18	78		664	48.71	13.73	49	18	80		940	47.38	13.44	47	18	80
		SBP	276	133.67	22.76	130.5	87.33	216.67		664	136.64	25.73	131.33	79.33	241.67		940	135.77	24.92	131.16	79.33	241.67
		DBP	276	84.48	14.82	82.67	52	136		664	84.51	14.89	83	42.67	166.67		940	84.5	14.86	82.67	42.67	166.67
		PP	276	49.19	14.29	47.34	23.33	100.33		664	52.12	16.22	48.67	18.33	137.67		940	51.26	15.73	48.33	18.33	137.67
INGI-FVG	EUR	Sex (men)	17							90							243
		Medication	0							0							0
		Hypertension	0							0							0
		Age (years)	63	50.51	12.47	51	19	74		180	46.37	12.9	46	18	68		243	47.45	13	47	18	74
		SBP	63	130.3	17.69	130	95	170		180	132.5	19.95	130	95	200		243	132	19.38	130	95	200
		DBP	63	82.21	8.71	81.67	60	106.67		180	83.47	10.25	81.67	60	120		243	83.14	9.88	81.67	60	120
		PP	63	48.06	14.76	50	15	95.33		180	49	15.53	45	20	113		243	48.75	15.3	48.33	15	113.33
INGI_VBI	EUR	Sex (men)	8							142							370
		Medication	16							100							116
		Hypertension	14							95							109
		Age (years)	47	58.85	14.9	61	30	85		323	57.52	14.89	60	25	87		370	57.69	14.88	60	25	87
		SBP	47	129	22.27	125	100	185		323	128.9	22.07	125	75	205		370	128.9	22.06	125	75	205
		DBP	47	78.67	10.3	80	60	105		323	81.31	11.35	80	50	125		370	80.97	11.24	80	50	125
		PP	47	50.26	14.55	45	38.66	105		323	48.12	12.06	42.5	38.66	100		370	48.39	12.41	45	38.66	105
JHS	AFR	Sex (men)	88							448							536
		Medication	148							460							608
		Hypertension	184							582							766
		Age (years)	336	47.39	11.1274	47	20	84		1113	49.07	11.4424	49	21	89		1449	48.68	11.3885	48	20	89
		SBP	336	130.1	20.6112	128	92	224		1113	129.9	20.4523	127	73	225		1449	129.9	20.4823	127	73	225
		DBP	336	84.77	11.8009	85	54	120		1113	84.25	11.746	84	48	130		1449	84.37	11.7568	84	48	130
		PP	336	45.34	15.2105	43	19	130		1113	45.65	14.8746	43	14	131		1449	45.58	14.9485	43	14	131
KoGES-Rural	EAS	Sex (men)	199							1171							1370
		Medication	93							370							463
		Hypertension	271							834							1105
		Age (years)	897	62.2999	8.87565	63	40	87		2905	59.5281	9.08143	60	40	88		3802	60.182	9.10851	61	40	88
		SBP	897	125.954	18.3018	124	86	200		2905	124.796	18.0979	122	74	209		3802	125.069	18.1504	123	74	209
		DBP	897	78.6477	10.5189	79	50	125		2905	78.9287	10.9054	79	40	124		3802	78.8624	10.8148	79	40	125
		PP	897	47.3066	13.6532	45	21	115		2905	45.8671	12.4401	44	13	118		3802	46.2067	12.7495	44	13	118
KoGES-Urban	EAS	Sex (men)	322							3721							4043
		Medication	244							1690							1934
		Hypertension	363							2688							3051
		Age (years)	1262	53.5499	8.06065	53	40	73		9945	53.1185	8.11279	53	40	74		11207	53.167	8.10773	53	40	74
		SBP	1262	124.941	18.1097	123	84	195		9945	125.129	17.1321	124	78.5	202		11207	125.108	17.2443	124	78.5	202
		DBP	1262	77.5083	11.6705	78	48	121		9945	77.5084	11.1093	78	46	130		11207	77.5084	11.1734	78	46	130
		PP	1262	47.4323	10.7783	46	19	104		9945	47.6201	10.4197	47.5	15	110.374		11207	47.5989	10.4604	47	15	110.374
LBC1921	EUR	Sex (men)	13							198							211
		Medication	11							195							206
		Hypertension	11							195							206
		Age (years)	30	79.08	0.56	79.11	78.08	80.1		480	79.05	0.58	79.07	77.74	80.56		510	79.05	0.57	79.07	77.74	80.56
		SBP	30	176.13	30.3	171.5	133	253		480	173.72	28.28	173	81	259		510	173.86	28.38	173	81	259
		DBP	30	87.47	18.11	83	58	133		480	86.5	14.01	85.5	43	132		510	86.55	14.26	85	43	133
		PP	30	88.67	18.44	86.5	56	139		480	87.23	21.7	87	20	160		510	87.31	21.5	87	20	160
LBC1936	EUR	Sex (men)	29							476							506
		Medication	19							376							395
		Hypertension	19							376							395
		Age (years)	47	69.48	0.9	69.51	67.77	71.11		944	69.56	0.84	69.57	67.61	71.3		991	69.56	0.84	69.57	67.61	71.3
		SBP	47	152.78	19.41	150.67	117.33	220		944	155.51	20.74	154	100	220.67		991	155.38	20.67	154	100	220.67
		DBP	47	84.04	11.66	83.33	62	117.67		944	85.25	11.24	85	54	126.33		991	85.19	11.25	85	54	126.33
		PP	47	68.74	14.34	68.67	40.67	105.67		944	70.26	15.33	68.67	29	130		991	70.19	15.28	85	29	130
Lifelines-GSA	EUR	Sex (men)	192							9106							9298
		Medication	61							2350							2411
		Hypertension
		Age (years)	573	42.9616	14.2114	44	18	81		22648	46.4292	13.7269	47	18	90		23221	46.3437	13.7493	47	18	90
		SBP	573	127.4	17.1344	125	87	212		22648	128.212	17.2594	126	60	218		23221	128.192	17.2565	126	60	218
		DBP	573	73.5899	10.6235	72	51	113		22648	73.9306	10.1973	72	45	130		23221	73.9222	10.2079	72	45	130
		PP	573	53.8098	11.7762	53	27	108		22648	54.2809	11.8246	53	-7	125.224		23221	54.2692	11.8234	53	-7	125.224
Lifelines-CS	EUR	Sex (men)	114							4091							4205
		Medication	33							1190							1223
		Hypertension
		Age (years)	308	48.0909	8.98161	49	21	79		9875	51.9365	10.1365	52	21	91		10183	51.8202	10.1246	52	21	91
		SBP	308	130.841	16.2768	128	96	201		9875	131.09	18.0156	129	85	215		10183	131.083	17.9648	129	85	215
		DBP	308	76.2597	10.8543	73.5	55	108		9875	75.9113	10.2703	75	45	124		10183	75.9218	10.2881	75	45	124
		PP	308	54.5812	11.226	54	31	100		9875	55.1791	12.7102	53	23	119		10183	55.1611	12.6678	53	23	119
LLFS	EUR	Sex (men)	153							1744							1897
		Medication	205							1597							1802
		Age (years)	383	75.41	17.25	78	36	104		3796	69.04	15.12	65	24	108		4179	69.63	15.44	65	24	108
		raw SBP (not med adjusted)	383	131.84	23.89	129	81	215		3796	131.44	21.67	129	76	239		4179	131.47	21.88	129	76	239
		SBP	383	139.87	25.91	136	94	230		3796	137.75	23.9	135	76	254		4179	137.94	24.09	135	76	254
		raw DBP (not med adjusted)	383	74.74	11.81	74	45	122		3796	77.53	11.3	77	42	131		4179	77.28	11.37	77	42	131
		DBP	383	80.09	12.19	79	45	132		3796	81.74	11.74	81	44	131		4179	81.59	11.79	81	44	132
		PP (derived from med-adjusted SBP/DBP)	383	59.78	21.36	56	22	127		3796	56.01	18.46	53	19	153		4179	56.35	18.77	53	19	153
MESA	EUR	Sex (men)	99							1176							1275
		Medication	106							788							894
		Hypertension	115							907							1022
		Age (years)	286	62.31	10.77	62	45	84		2382	62.77	10.07	63	44	87		2668	62.72	10.15	63	44	87
		SBP	286	129.36	26.15	125	80	212		2382	128.04	22.74	125.5	77	223.5		2668	128.18	23.13	125.5	77	223.5
		DBP	286	73.21	11.64	71.75	50	116.5		2382	73.38	11.18	73	37	108.5		2668	73.36	11.23	73	37	116.5
		PP	286	56.15	19.75	52.5	21.5	125		2382	54.66	17.03	51.5	19.5	130		2668	54.82	17.35	52	19.5	130
MESA	EAS	Sex (men)	19							361							380
		Medication	16							209							225
		Hypertension	23							270							293
		Age (years)	61	59.77	9.84	58	45	82		714	62.66	10.42	63	44	84		775	62.43	10.4	62	44	84
		SBP	61	127.2	25.73	124	88	203.5		714	129.13	24.94	126	77.5	219		775	128.97	24.99	125	77.5	219
		DBP	61	74.81	12.55	73.5	47	114		714	74.78	11.95	74	43.5	118		775	74.78	11.99	74	43.5	118
		PP	61	52.39	18.45	47	27	104		714	54.35	18.16	51	20.5	120.5		775	54.19	18.18	51	20.5	120.5
MESA	AFR	Sex (men)	60							719							779
		Medication	102							745							847
		Hypertension	123							876							999
		Age (years)	196	60.72	10.69	59	45	84		1500	62.38	9.95	63	45	84		1696	62.19	10.05	62	45	84
		SBP	196	139.78	25.41	137	90.5	203.5		1500	138.81	24.76	137	80.5	245.5		1696	138.92	24.83	137	80.5	245.5
		DBP	196	79.77	11.59	79.25	53.5	106.5		1500	79.4	11.82	78.5	46.5	128.5		1696	79.44	11.79	79	46.5	128.5
		PP	196	60.01	19.03	56.25	26	117		1500	59.41	18.35	56.5	19.5	154		1696	59.48	18.42	56.5	19.5	154
MESA	HIS	Sex (men)	98							623							721
		Medication	109							392							501
		Hypertension	133							497							630
		Age (years)	310	60.63	10.33	60	44	84		1188	61.6	10.19	61	44	84		1498	61.4	10.23	61	44	84
		SBP	310	132.02	28.08	127.5	88	219.5		1188	131.67	24.27	128.5	80	226.5		1498	131.74	25.1	128.5	80	226.5
		DBP	310	73.83	12.28	72.5	49	108.5		1188	75.11	11.54	74.5	43	118.5		1498	74.84	11.7	74	43	118.5
		PP	310	58.19	20.36	55	27	131.5		1188	56.56	18.35	53	24	129.5		1498	56.9	18.79	53	24	131.5
NEO	EUR	Sex (men)	1674							4048							5722
		Medication	629							1175							1804
		Hypertension	629							1175							1804
		Age (years)	1674	55.6	5.88	56	44	66		4048	56.1	5.97	57	44	66		5722	56	5.96	56	44	66
		SBP	1674	136	19	135	92.7	212		4048	138	19.5	136	84.7	228		5722	138	19.4	136	84.7	228
		DBP	1674	88.1	11.6	88	55.7	128		4048	88.3	11.7	87.3	44.7	153		5722	88.2	11.7	87.7	44.7	153
		PP	1674	48.1	11.5	46.7	23.3	105		4048	49.8	11.7	48.7	18.3	148		5722	49.3	11.7	48	18.3	148
NESDA	EUR	Sex (men)	545							309							854
		Medication	267							107							374
		Hypertension	719							338							1057
		Age (years)	1681	42.298	12.5957	43	18	65		855	42.1181	13.7525	44	18	65		2536	42.2374	12.9948	43	18	65
		SBP	1681	136.404	20.2482	132.5	73.5	222.5		855	136.758	21.3291	132	65.5	221.5		2536	136.523	20.6154	132.5	65.5	222.5
		DBP	1681	82.3914	11.8791	81	42.5	127.5		855	81.4637	12.2419	79.5	35.5	128.5		2536	82.0787	12.0082	80.5	35.5	128.5
		PP	1681	54.0122	12.6829	52	25	118.5		855	55.2942	13.4517	53	29.5	121.5		2536	54.4444	12.9587	52.5	25	121.5
SHIP-START	EUR	Sex (men)	81							768							849
		Medication	97							559							656
		Hypertension	130							878							1008
		Age (years)	235	55.613	13.699	56	29	89		1568	55.58	13.353	56	30	89		1803	55.584	13.395	56	29	89
		SBP	235	136.729	20.979	134.333	98.333	201.333		1568	139.418	22.363	138.333	84.333	244		1803	139.068	22.2	138	84.333	244
		DBP	235	83.348	11.537	81	60	116.333		1568	83.958	11.795	83.167	51.667	132.667		1803	83.878	11.76	83	51.667	132.667
		PP	235	53.382	14.207	51	28	95.667		1568	55.461	15.411	54	17.667	116.333		1803	55.19	15.272	53.667	17.667	116.333
SHIP-TRAND_B1	EUR	Sex (men)	24							398							422
		Medication	22							247							269
		Hypertension	25							360							385
		Age (years)	68	49.721	11.455	49.5	24	80		892	50.151	13.866	50.5	20	81		960	50.121	13.704	50	20	81
		SBP	68	128.039	22.284	126.667	91	222		892	129.7	19.436	128.333	82	211.333		960	129.583	19.643	128	82	222
		DBP	68	80.826	11.939	81	63.333	125.5		892	79.936	11.225	79	54	120.333		960	79.999	11.273	79	54	125.5
		PP	68	47.213	14.597	44.667	17.333	109		892	49.764	12.513	48	22.667	107.333		960	49.584	12.68	48	17.333	109
SHIP-TREND_B2	EUR	Sex (men)	84							1367							1451
		Medication	81							1005							1086
		Hypertension	113							1413							1526
		Age (years)	214	49.846	13.912	51	20	80		2711	52.145	15.871	53	20	83		2925	51.977	15.745	53	20	83
		SBP	214	133.128	21.387	131.5	91.667	202		2711	135.517	22.101	134.333	87.667	240.333		2925	135.342	22.054	134	87.667	240.333
		DBP	214	81.774	11.423	80.333	57.667	118.333		2711	81.553	11.443	81	53	143.667		2925	81.569	11.44	81	53	143.667
		PP	214	51.354	14.104	49	20	99.333		2711	53.964	14.917	51.667	21.333	137		2925	53.773	14.872	51.333	20	137
SP2-1M	EAS	Sex (men)	26							545							571
		Medication	5							107							112
		Hypertension	5							107							112
		Age (years)	44	42	10	42	25	67		872	47	10	46	25	80		916	47	10	46	25	80
		SBP	44	130.4	20.8	129.5	98.5	201		871	130.8	20.6	127	88.5	205.5		915	130.8	20.6	127.5	88.5	205.5
		DBP	44	79.6	14.8	79	55.5	132		871	79.3	11.9	77.5	48.5	129		915	79.4	12	78	48.5	132
		PP	44	50.8	10	49.2	34.5	71		871	51.5	13.2	48.5	28	116		915	51.5	13.1	48.5	28	116
SP2-610	EAS	Sex (men)	11							177							188
		Medication	4							136							140
		Hypertension	4							136							140
		Age (years)	53	46	14	44	26	82		877	49	11	49	25	80		930	49	11	49	25	82
		SBP	53	127.6	24.3	124	92.5	190.5		877	130.2	23.3	125.5	89.5	213		930	130	23.4	125.5	89.5	213
		DBP	53	74.2	10.4	72.5	52.5	100.5		877	76	11.7	74	50.5	121.5		930	75.9	11.6	74	50.5	121.5
		PP	53	53.4	17.6	50	26.5	109		877	54.2	16	50.5	26	114		930	54.1	16.1	50.5	26	114
SWAN	EUR	Sex (men)	0							0							0
		Medication	20							54							74
		Hypertension	40							127							167
		Age (years)	161	46.0311	2.56681	45.7	42.1	52.9		578	46.6438	2.72215	46.5	42	53		739	46.5103	2.69926	46.3	42	53
		SBP	161	113.214	15.8298	111	80	183		578	114.094	15.2123	111	82	190		739	113.903	15.3424	111	80	190
		DBP	161	74.6025	9.81343	74	52	110		578	73.5242	9.98141	72	49	113		739	73.7591	9.94842	73	49	113
		PP	161	38.6118	10.6309	37	18	80		578	40.5701	10.3226	39	16	94		739	40.1434	10.4147	39	16	94
SWAN	AFR	Sex (men)	0							0							0
		Medication	29							67							96
		Hypertension	52							129							181
		Age (years)	104	45.7529	2.26801	45.85	42.1	50.9		262	46.4866	2.79758	46.25	42	53		366	46.2781	2.67541	46.2	42	53
		SBP	104	129.168	25.0396	122	90	193		262	128.962	22.7422	126	88	241		366	129.02	23.3832	125.5	88	241
		DBP	104	78.9904	15.3923	76	46	129		262	79.5916	13.8353	78	41	135		366	79.4208	14.2761	78	41	135
		PP	104	50.1779	15.6202	48.5	21	104		262	49.3702	14.7363	47	14	127		366	49.5997	14.9756	47	14	127
UKB (MHQ)	AFR	Sex (men)	47	0.691176	NA	NA	NA	NA		486	0.594132	NA	NA	NA	NA		533	0.60158	NA	NA	NA	NA
		Medication	19	0.279412	NA	NA	NA	NA		187	0.228606	NA	NA	NA	NA		206	0.232506	NA	NA	NA	NA
		Hypertension	48	0.727273	NA	NA	NA	NA		587	0.734668	NA	NA	NA	NA		635	0.734104	NA	NA	NA	NA
		Age (years)	68	49.1765	6.70028	49	40	68		818	50.9792	7.35468	50	40	70		886	50.8409	7.31878	50	40	70
		SBP	66	136.371	17.1139	134.5	102	182.5		799	138.937	20.1695	135.5	97	219		865	138.742	19.9558	135.5	97	219
		DBP	66	86.7576	11.3606	87.25	62	113		799	85.7365	12.3685	85	55	134.5		865	85.8145	12.2914	85	55	134.5
		PP	66	49.6136	10.1791	48.75	33.5	81		799	53.2009	12.5036	51	25.5	121		865	52.9272	12.3734	51	25.5	121
UKB (MHQ)	HIS	Sex (men)	12	0.571429	NA	NA	NA	NA		154	0.65812	NA	NA	NA	NA		166	0.65098	NA	NA	NA	NA
		Medication	3	0.142857	NA	NA	NA	NA		37	0.15812	NA	NA	NA	NA		40	0.156863	NA	NA	NA	NA
		Hypertension	9	0.428571	NA	NA	NA	NA		140	0.627803	NA	NA	NA	NA		149	0.610656	NA	NA	NA	NA
		Age (years)	21	50.4286	7.7238	49	40	66		234	52.5769	8.36176	52	40	69		255	52.4	8.3178	51	40	69
		SBP	21	125.738	20.0852	122	101.5	180		223	133.655	18.1438	129.5	98	189.5		244	132.973	18.4093	129.5	98	189.5
		DBP	21	76.5714	12.2824	73.5	58.5	99.5		223	81.3879	10.2813	81	58.5	107.5		244	80.9734	10.5271	79.75	58.5	107.5
		PP	21	49.1667	12.3636	47	34.5	91.5		223	52.2668	12.4483	50.5	28	89.5		244	52	12.4463	49.25	28	91.5
UKB (MHQ)	SAS	Sex (men)	55	0.509259	NA	NA	NA	NA		411	0.41018	NA	NA	NA	NA		466	0.41982	NA	NA	NA	NA
		Medication	23	0.212963	NA	NA	NA	NA		215	0.214571	NA	NA	NA	NA		238	0.214414	NA	NA	NA	NA
		Hypertension	72	0.712871	NA	NA	NA	NA		684	0.705155	NA	NA	NA	NA		756	0.705882	NA	NA	NA	NA
		Age (years)	108	50.7963	7.57981	50	40	67		1002	53.0898	8.35082	53	40	70		1110	52.8667	8.30365	53	40	70
		SBP	101	133.802	18.0412	131.5	101.5	194.5		970	136.464	20.0332	134	94	202		1071	136.213	19.8613	134	94	202
		DBP	101	84.7178	10.9705	83	61	121		970	84.0902	10.8814	83	54.5	125		1071	84.1494	10.8862	83	54.5	125
		PP	101	49.0842	12.0862	46.5	28.5	91		970	52.3737	13.1684	50	22.5	105.5		1071	52.0635	13.1002	50	22.5	105.5
UKB (MHQ)	EAS	Sex (men)	19	0.633333	NA	NA	NA	NA		414	0.725044	NA	NA	NA	NA		433	0.720466	NA	NA	NA	NA
		Medication	7	0.233333	NA	NA	NA	NA		56	0.0980736	NA	NA	NA	NA		63	0.104825	NA	NA	NA	NA
		Hypertension	18	0.666667	NA	NA	NA	NA		325	0.593066	NA	NA	NA	NA		343	0.596522	NA	NA	NA	NA
		Age (years)	30	51.1333	6.72993	49.5	40	65		571	52.0998	7.36603	51	40	69		601	52.0516	7.33342	51	40	69
		SBP	27	133.315	20.0078	129.5	100	193		548	131.804	20.2022	128.5	91.5	206		575	131.875	20.1784	129	91.5	206
		DBP	27	84.1111	11.4256	80.5	70	115.5		548	81.6834	11.0428	80.5	55.5	118		575	81.7974	11.0628	80.5	55.5	118
		PP	27	49.2037	11.8096	48	29.5	82.5		548	50.1204	13.1064	47.25	30	127.5		575	50.0774	13.0404	47.5	29.5	127.5
UKB (MHQ)	EUR	Sex (men)	4353	0.627776	NA	NA	NA	NA		62095	0.555238	NA	NA	NA	NA		66448	0.559473	NA	NA	NA	NA
		Medication	1477	0.213008	NA	NA	NA	NA		19781	0.176877	NA	NA	NA	NA		21258	0.178986	NA	NA	NA	NA
		Hypertension	4582	0.715044	NA	NA	NA	NA		74914	0.725665	NA	NA	NA	NA		79496	0.725044	NA	NA	NA	NA
		Age (years)	6934	53.0907	7.71406	53	40	70		111835	56.3118	7.65316	57	39	72		118769	56.1238	7.69385	57	39	72
		SBP	6407	137.046	19.4828	135	90	245.5		103235	139.227	19.8656	137	79	245		109642	139.099	19.8499	137	79	245.5
		DBP	6408	84.178	11.382	83.5	52	144		103236	83.4387	10.9744	82.5	46.5	137		109644	83.4819	11	82.5	46.5	144
		PP	6407	52.8679	12.7381	51	23	138		103235	55.7878	13.3697	54	19.5	141.856		109642	55.6172	13.3511	53.5	19.5	141.856
UKB (non-MHQ)	AFR	Sex (men)	873	0.720892	NA	NA	NA	NA		2265	0.545258	NA	NA	NA	NA		3138	0.584902	NA	NA	NA	NA
		Medication	478	0.394715	NA	NA	NA	NA		1421	0.34208	NA	NA	NA	NA		1899	0.353961	NA	NA	NA	NA
		Hypertension	924	0.791774	NA	NA	NA	NA		3258	0.808437	NA	NA	NA	NA		4182	0.804695	NA	NA	NA	NA
		Age (years)	1211	52.0595	7.66411	51	40	70		4154	52.9497	8.38905	52	39	70		5365	52.7487	8.23872	51	39	70
		SBP	1167	142.852	21.8756	142.5	90	232		4030	144.712	21.6136	142.75	90	236.5		5197	144.294	21.6845	142.5	90	236.5
		DBP	1167	88.5754	12.5953	88.5	54	134.5		4030	88.2931	12.2221	87.5	52	138.5		5197	88.3565	12.3063	88	52	138.5
		PP	1167	54.2763	13.765	52.5	21	136		4030	56.4186	14.0041	54.5	24	134.5		5197	55.9376	13.978	54	21	136
UKB (non-MHQ)	HIS	Sex (men)	181	0.715415	NA	NA	NA	NA		290	0.610526	NA	NA	NA	NA		471	0.646978	NA	NA	NA	NA
		Medication	45	0.177866	NA	NA	NA	NA		72	0.151579	NA	NA	NA	NA		117	0.160714	NA	NA	NA	NA
		Hypertension	144	0.60251	NA	NA	NA	NA		306	0.671053	NA	NA	NA	NA		450	0.647482	NA	NA	NA	NA
		Age (years)	253	52.8261	8.31482	53	40	70		475	53	8.27813	52	40	70		728	52.9396	8.2856	52	40	70
		SBP	239	132.561	20.4916	129.5	90.5	219.5		456	135.195	19.4588	133.25	91.5	210		695	134.289	19.8448	132	90.5	219.5
		DBP	239	81.4582	11.5363	80	51.5	115.5		456	81.7566	10.9344	81.5	54	111.5		695	81.654	11.1377	81	51.5	115.5
		PP	239	51.1025	13.1026	48	27	107		456	53.4386	12.9236	51	25	102		695	52.6353	13.0234	50	25	107
UKB (non-MHQ)	SAS	Sex (men)	916	0.553474	NA	NA	NA	NA		2410	0.436515	NA	NA	NA	NA		3326	0.463489	NA	NA	NA	NA
		Medication	550	0.332326	NA	NA	NA	NA		1622	0.293787	NA	NA	NA	NA		2172	0.302676	NA	NA	NA	NA
		Hypertension	1148	0.735897	NA	NA	NA	NA		4018	0.765917	NA	NA	NA	NA		5166	0.759036	NA	NA	NA	NA
		Age (years)	1655	53.0592	8.2616	53	40	70		5521	53.8183	8.61763	54	40	72		7176	53.6433	8.54226	53	40	72
		SBP	1560	138.296	21.8392	135.75	65	256		5246	140.455	21.0254	138.5	83.5	243.5		6806	139.96	21.2325	137.5	65	256
		DBP	1560	84.9734	11.47	84	44	121.5		5246	85.8088	11.26	85	49	137.5		6806	85.6173	11.3131	85	44	137.5
		PP	1560	53.3224	14.6513	50.5	21	139.5		5246	54.6467	14.3235	52	19.5	141		6806	54.3432	14.409	52	19.5	141
UKB (non-MHQ)	EAS	Sex (men)	280	0.752688	NA	NA	NA	NA		1068	0.621291	NA	NA	NA	NA		1348	0.644668	NA	NA	NA	NA
		Medication	68	0.182796	NA	NA	NA	NA		315	0.183246	NA	NA	NA	NA		383	0.183166	NA	NA	NA	NA
		Hypertension	214	0.623907	NA	NA	NA	NA		1108	0.692067	NA	NA	NA	NA		1322	0.680041	NA	NA	NA	NA
		Age (years)	372	52.3495	7.54011	52	40	70		1719	52.2496	8.09935	52	37	70		2091	52.2673	8.00106	52	37	70
		SBP	343	134.232	21.5734	131.5	87	203		1601	136.954	21.3438	135	87.5	224.5		1944	136.474	21.4041	134.5	87	224.5
		DBP	343	83.4446	12.3252	81.5	54.5	137		1601	84.352	12.068	83.5	52	131		1944	84.1919	12.1155	83.5	52	137
		PP	343	50.7872	12.624	48.5	25	91		1601	52.6018	13.6382	50.5	25.5	119		1944	52.2816	13.4795	50	25	119
UKB (non-MHQ)	EUR	Sex (men)	55663	0.633802	NA	NA	NA	NA		71996	0.46534	NA	NA	NA	NA		127659	0.52634	NA	NA	NA	NA
		Medication	24185	0.27538	NA	NA	NA	NA		37735	0.243897	NA	NA	NA	NA		61920	0.255297	NA	NA	NA	NA
		Hypertension	60183	0.756857	NA	NA	NA	NA		111057	0.788852	NA	NA	NA	NA		171240	0.777304	NA	NA	NA	NA
		Age (years)	87824	56.7673	7.96384	58	39	71		154717	57.4011	8.21976	59	40	71		242541	57.1716	8.13371	59	39	71
		SBP	79517	141.147	20.8931	139.5	80	262		140783	143.592	20.8274	142	72	265.383		220300	142.709	20.8841	141	72	265.383
		DBP	79520	84.6828	11.4199	84	46	146.5		140785	85.1819	11.1932	84.5	42	142.5		220305	85.0017	11.2781	84.5	42	146.5
		PP	79517	56.463	14.3538	54.5	19.5	141.856		140783	58.4086	14.4841	56.5	20.5	141.856		220300	57.7063	14.4674	55.5	19.5	141.856
WHI-WHIMS	EUR	Sex (men)	0							0							0
		Medication	121							1158							1279
		Hypertension	156							1523							1679
		Age (years)	401	66.73	6.64	68	50	79		4590	68.16	5.71	69	50	79		4991	68.04	5.8	68	50	79
		SBP	401	133.74	21.89	131	90	206		4590	134.1	20.38	132	81	210		4991	134.07	20.51	132	81	210
		DBP	401	77.42	11.28	78	40	113		4590	77.4	10.52	77	40	114		4991	77.41	10.58	77	40	114
		PP	401	56.32	16.26	55	14	115		4590	56.7	15.69	55	12	130		4991	56.67	15.74	55	12	130
WHI-GARNET	EUR	Sex (men)	0							0							0
		Medication	108							916							1024
		Hypertension	146							1183							1329
		Age (years)	350	63.41	7.22	63	50	79		3077	65.95	6.82	67	50	79		3427	65.69	6.9	66	50	79
		SBP	350	133.19	20.11	132	81	189		3077	135.13	20.69	133	86	211		3427	134.94	20.63	133	81	211
		DBP	350	78.56	10.68	78	52	113		3077	78.6	10.91	78	40	113		3427	78.59	10.88	78	40	113
		PP	350	54.63	15.2	53	24	111		3077	56.54	15.81	55	17	123		3427	56.34	15.76	55	17	123
WHI-SHARe	AFR	Sex (men)	0							0							0
		Medication	472							3027							3499
		Hypertension	578							3615							4193
		Age (years)	1012	60.46	7.03	60	50	79		6592	61.65	6.98	61	50	79		7604	61.49	7	61	50	79
		SBP	1012	138.62	21.64	137	87.5	235		6592	138.93	21.07	138	80	227		7604	138.89	21.17	138	80	235
		DBP	1012	82.77	11.87	82	48	125		6592	82.72	11.19	82	46	130		7604	82.73	11.28	82	46	130
		PP	1012	55.85	15.93	54	17.5	115		6592	56.21	15.94	55	17	133		7604	56.16	15.94	55	17	133
WHI-SHARe	HIS	Sex (men)	0							0							0
		Medication	137							487							624
		Hypertension	190							717							907
		Age (years)	571	59.46	6.62	58	49	79		2522	60.41	6.65	60	30	79		3093	60.23	6.66	59	49	79
		SBP	571	129.18	19.82	126	84	200		2522	128.39	19.9	125	85	213		3093	128.54	19.88	125	84	213
		DBP	571	77.98	10.39	78	51	108		2522	76.72	10.9	76	40	122		3093	76.95	10.82	76	40	122
		PP	571	51.2	14.56	49	22	112		2522	51.67	14.34	50	13	121		3093	51.59	14.38	50	13	121
YFS	EUR	Sex (men)	49							605							654
		Medication	12							98							110
		Hypertension	28							266							294
		Age (years)	161	37.83	4.839	39	30	45		1400	37.72	5.017	39	30	45		1561	37.73	4.998	39	30	45
		SBP	161	120.7	15.24	118.7	93.33	169.7		1400	121.6	15.24	119.6	77.33	175		1561	121.5	15.24	119.3	77.3	175
		DBP	161	76.35	12.94	74.67	47.33	120		1400	76.24	12.02	75.33	42	112.7		1561	76.25	12.12	75.33	42	120
		PP	161	44.4	8.725	44	27.33	77.33		1400	45.38	9.215	44.67	20	87.33		1561	45.28	9.168	44.67	20	87.33
EAS: East Asian; SAS: South Asian

## Sheet: Table S2
Table S2. Depression score statistics in the total sample and within each group stratified by dDEPR status
Study Name	Population	dDEPR = 1 (E1)							dDEPR = 0 (E0)							Total study population (irrespective of E)
		N	Mean	SD	Median	Min.	Max.		N	Mean	SD	Median	Min.	Max.		N	Mean	SD	Median	Min.	Max.
AGES gsa	EUR	226	7.64159	1.84508	7	6	14		2265	2.07991	1.44733	2	0	5		2491	2.5845	2.1829	2	0	14
AGES hu370CNV	EUR	203	7.80296	2.0174	7	6	15		2593	1.93868	1.40288	2	0	5		2796	2.36445	2.1061	2	0	15
ARIC	AFR	118	10.96	1.97	10	9	17		995	2.9	2.39	2	0	8		1113	3.75	3.42	3	0	17
ARIC	EUR	230	10.73	1.88	10	9	19		3832	2.5	2.12	2	0	8		4062	2.96	2.84	2	0	19
ASPREE	EUR	535	12.7057	2.93965	12	10	22.305		11496	2.64189	2.39684	2	0	9		12031	3.08941	3.1901	2	0	22.305
ASPS	EUR	79	8.53	2.35	8	6	15		698	0.91	1.29	0	0	5		777	1.69	2.71	1	0	15
ASPS-Fam	EUR	26	7.73	1.73	7	6	12		321	1.56	1.41	1	0	5		347	2.02	2.17	1	0	12
BES-610	EAS	9	56	4	56	50	60		576	25	5	23	20	49		585	26	6	23	20	60
BES-omni	EAS	2	56	2	56	54	57		555	25	5	23	20	48		557	25	5	23	20	57
BHS	EUR	125	14.5	4.2	13	10	30		313	4.47	2.69	5	0	9		438	7.3	5.6	6	0	30
BHS	AFR	68	14.2	3.49	13	10	24		121	5.51	2.44	5	0	9		189	8.63	5.1	8	0	24
BIOVU-PHQ2	AFR	21	4.80952	0.928388	4	4	6		189	0.634921	0.994157	0	0	3		210	1.05238	1.59608	0	0	6
BIOVU-PHQ2	EUR	127	4.1811	1.13681	4	2	6		1138	0.403339	0.726352	0	0	2		1265	0.782609	1.376	0	0	6
BIOVU-PHQ8	AFR	33	14.8788	2.7244	14	11	22		291	3.10309	3.16604	2	0	11		324	4.30247	4.73913	2	0	22
BIOVU-PHQ8	EUR	190	14.3368	3.4028	13	10	24		1703	2.57193	2.75614	2	0	11		1893	3.75277	4.52713	2	0	24
CARDIA	AFR	246	22.66	6.43	21	16	50		562	8.05	3.83	8	1	15		808	12.5	8.24	11	1	50
CARDIA	EUR	285	22.4	6.54	20	16	52		1230	7.45	3.94	7	1	15		1515	10.27	7.4	9	1	52
CFS	AFR	28	33.2857	14.4039	38	0	52		79	76.2025	13.0309	76	56	100		107	64.972	23.1734	68	0	100
CFS	EUR	73	39.5616	10.6575	40	16	52		326	76.7199	11.8251	76	56	100		399	69.9216	18.4838	72	16	100
CHS	EUR	336	13.3442	3.65795	12	10	26		2924	3.08461	2.60597	3	0	9		3260	4.14204	4.14729	3	0	26
CHS	AFR	170	13.7026	3.93149	12	10	29		652	3.73756	2.74883	4	0	9		822	5.79846	5.04804	5	0	29
FHS	EUR	726	23.0234	6.93483	21	16	53		6414	4.54256	4.01925	4	0	15		7140	6.42171	7.11315	4	0	53
GAPP	EUR	174	20.25	5.1585	18	16	42.57		924	10.24	3.19604	11	0	15		1098	11.83	5.11555	12	0	42.57
GENOA	AFR	85	11.29	2.31	11	9	18		283	5.41	1.44	5	3	8		368	6.769	2.997	6	3	18
HCHS/SOL	HIS	3432	15.1483	4.63421	14	10	30		8105	4.0221	2.77313	4	0	9		11537	7.33188	6.13697	6	0	30
HCS	EUR	175	39.3571	12.7185	37.5	0	50		1675	92.9776	11.7469	100	62.5	100		1850	87.9054	19.6604	100	0	100
HRS	AFR	433	5.56	1.24	5	4	8		1781	0.97	0.97	1	0	3		2214	1.86	2.09	1	0	8
HRS	EUR	1211	5.47	1.32	5	4	8		9036	0.71	0.95	0	0	3		10247	1.27	1.83	1	0	8
HUFS	AFR	276	25.25	8.55	22.5	16	56		664	6.41	4.58	6	0	15		940	11.94	10.48	9	0	56
INGI-FVG	EUR	63	13.6	4.85	13	8	28		180	2.49	2.38	2	0	7		243	5.37	5.83	4	0	28
INGI_VBI	EUR	47	1.314	0.34035	1.23	1	2.46		323	0.3148	0.254977	0.23	0	0.92		370	0.4418	0.4269	0.31	0	2.46
JHS	AFR	336	23.14	6.70435	21	16	47		1113	7.377	4.269	7	0	15		1449	11.03	8.28625	9	0	47
KoGES-Rural	EAS	897	43.5184	7.73457	41	36	76		2905	29.4843	3.11695	29	20	35		3802	32.7954	7.55237	30	20	76
KoGES-Urban	EAS	1262	23.2155	7.61293	21	16	60		9945	9.10447	2.36524	9	0	15		11207	10.6935	5.60229	9	0	60
LBC1921	EUR	30	8.87	1.5	8	8	14		480	3.1	1.85	3	0	7		510	3.44	2.28	3	0	14
LBC1936	EUR	47	9.26	1.44	9	8	16		944	2.49	1.76	2	0	7		991	2.81	2.26	2	0	16
Lifelines-GSA	EUR	573	6.26352	1.19966	6	5	9		22648	0.519869	0.946558	0	0	7		23221	0.661599	1.30511	0	0	9
Liflines-CS	EUR	308	6.20779	1.10182	6	5	9		9875	0.527899	0.924706	0	0	6		10183	0.699696	1.34617	0	0	9
LLFS	EUR	383	13.36	3.53	13	10	30		3796	3.22	2.57	3	0	9		4179	4.15	3.96	3	0	30
MESA	EUR	286	22.81	6.86	21	16	50		2382	5.15	4.02	4	0	15		2668	7.04	7.02	5	0	50
MESA	EAS	61	22.64	7.03	20	16	46		714	4.74	4.15	4	0	15		775	6.15	6.55	4	0	46
MESA	AFR	196	23.25	6.81	21	16	46		1500	5.23	4.16	5	0	15		1696	7.31	7.34	6	0	46
MESA	HIS	310	23.91	7.45	22	16	53		1188	5.78	4.38	5	0	15		1498	9.53	8.98	7	0	53
NEO	EUR	1674	21.74	7.7	19	14	63		4048	6.59	3.52	6	0	13		5722	11.03	8.58	9	0	63
NESDA	EUR	1681	29.3712	10.8245	28	14	69		855	6.7883	3.81859	7	0	13		2536	21.7575	14.0207	20	0	69
SHIP-START	EUR	235	20.153	6.795	18	14	47.9		1568	3.948	3.765	3	0	13		1803	6.06	6.935	4	0	47.9
SHIP-TRAND_B1	EUR	68	12.978	3.698	11.5	10	25.5		892	3.161	2.475	3	0	9		960	3.857	3.605	3	0	25.5
SHIP-TREND_B2	EUR	214	12.881	3.384	12	10	25.51		2711	3.221	2.495	3	0	9		2925	3.928	3.596	3	0	25.51
SP2-1M	EAS	44	46	6	50	20	50		872	81	12	85	55	100		916	80	14	80	20	100
SP2-610	EAS	53	44	6	45	25	50		877	81	12	85	55	100		930	79	15	80	25	100
SWAN	EUR	161	24.4567	7.70877	22	16	52		578	5.67471	4.14255	5	0	15		739	9.76659	9.30011	7	0	52
SWAN	AFR	104	25.2596	8.06165	23.5	16	47		262	6.40518	4.59471	5.5	0	15		366	11.7627	10.2929	9	0	47
UKB (MHQ)	AFR	68	11.3	0.623	11.7	10	11.7		818	2.01	2.48	1	0	9		886	2.74	3.46	1	0	11.7
UKB (MHQ)	AMR	21	13.5	2.11	14	10	15.9		234	2.23	2.5	1	0	9		255	3.15	3.96	2	0	15.9
UKB (MHQ)	SAS	108	11.8	0.861	12.4	10	12.4		1002	2.12	2.52	1	0	9		1110	3.05	3.74	2	0	12.4
UKB (MHQ)	EAS	30	12.3	1.04	13	10	13.1		571	1.98	2.41	1	0	9		601	2.5	3.27	1	0	13.1
UKB (MHQ)	EUR	6934	13	2.25	13	10	15.8		111835	2.09	2.31	1	0	9		118769	2.73	3.45	2	0	15.8
WHI-WHIMS	EUR	401	0.32	0.24	0.25	0.06	0.94		4590	0.01	0.01	0	0	0.06		4991	0.03	0.11	0	0	0.94
WHI-GARNET	EUR	350	0.31	0.24	0.23	0.06	0.94		3077	0.01	0.01	0	0	0.06		3427	0.04	0.12	0	0	0.94
WHI_SHARe	AFR	1012	0.34	0.25	0.28	0.06	0.96		6592	0.01	0.01	0	0	0.06		7604	0.05	0.15	0	0	0.96
WHI_SHARe	HIS	571	0.37	0.26	0.32	0.06	0.95		2522	0.01	0.01	0	0	0.06		3093	0.07	0.18	0	0	0.95
YFS	EUR	161	20.19	5.197	19	14	43		1400	3.449	3.604	2	0	13		1561	5.176	6.418	3	0	43
BBJ+Fujita, BioVU: Binary variable (Yes or No)
SWAN, WHI: females only
HANDLS: Information not provided
EAS: East Asian; SAS: South Asian

## Sheet: Table S3
Table S3. Identified known BP loci based on the previous BP GWAS literatures
Locus	Chr:Position (hg38)	rsID	Analysis group	Previous BP GWAS
				rsID	Chr:Position (hg38)	Population*	Reference (PMID)
Known BP loci in the dDEPR analyses
3p22.1	3:42213248	rs115760284	CPMA	rs142048131	3:42170346	EUR	34989438
7q21.11	7:78342531	rs147967138	ASN	rs848445	7:77943144	EUR	30224653
7q31.1	7:112203372	rs757194	AFR	rs144867634	7:111940111	EUR	33230300
12p12.1	12:21435910	rs7979305	AFR	rs704191	12:21862088	EUR	30224653
13q32.1	13:96826633	rs75095906	CPMA	rs7996639	13:96366836	EUR	30595370
16q23.2	16:81545886	rs9931605	CPMA	rs8059962	16:81540592	EUR	28951623
Known BP Loci in the qDEPR analyses
3p25.3	3:8726816	rs59284269	CPMA	rs74621754	3:8454685	EUR	27841878
4p14	4:39689605	rs145132348	AFR	rs58015370	4:39412030	EUR	30578418
12q13.13	12:52010638	rs114544309	CPMA	rs1732235	12:52024291	EUR	38689001
Population*: A specific population group in which the previously reported significant BP findings were identified in the literature, particularly in cases of mixed populations.

## Sheet: Table S4
Table S4. Top 20 genes identified in gene-based analyses using MAGMA or VEGAS2
Exposure	Population	Pheno	Gene	Chr	Start	Stop	Test	nSNPs	p-value
Top 20 genes using MAGMA software
qDEPR	EUR	DBP	GLTPD2	17	4692254	4693685	4.6089	7	2.024e-06
qDEPR	EUR	PP	TFAP2E	1	36038971	36060929	4.5015	105	3.3731e-06
dDEPR	ASN	SBP	ZFP82	19	36874022	36909558	4.4255	113	4.8101e-06
qDEPR	EUR	SBP	GLTPD2	17	4692254	4693685	4.4087	7	5.1994e-06
dDEPR	EUR	DBP	ARL6IP6	2	153574407	153617767	4.3718	191	6.1618e-06
dDEPR	ASN	SBP	TTC7A	2	47143296	47303276	4.2842	663	9.1708e-06
qDEPR	AFR	SBP	C1QBP	17	5336097	5352150	4.109	115	1.9871e-05
dDEPR	EUR	SBP	TFAP2E	1	36038971	36060929	4.0987	105	2.0778e-05
dDEPR	ASN	SBP	ECI1	16	2289396	2302301	4.0549	46	2.5083e-05
dDEPR	ASN	SBP	ZFP14	19	36827162	36870101	4.0399	115	2.6732e-05
dDEPR	ASN	SBP	ZNF565	19	36673188	36737159	4.0375	247	2.7013e-05
dDEPR	HIS	DBP	PKDREJ	22	46651560	46659219	4.0168	41	2.9492e-05
qDEPR	AFR	DBP	MUC6	11	1012821	1036706	3.9399	174	4.0762e-05
qDEPR	ASN	SBP	OR2T34	1	248737022	248738080	3.9155	1	4.511e-05
qDEPR	ASN	DBP	C14orf64	14	98391947	98444461	3.8517	233	5.8643e-05
qDEPR	EUR	DBP	ACSL1	4	185676749	185747972	3.8472	368	5.9738e-05
qDEPR	EUR	SBP	FAM216A	12	110906169	110928190	3.8404	88	6.1423e-05
qDEPR	AFR	SBP	SURF4	9	136228325	136242970	3.8058	79	7.0669e-05
qDEPR	AFR	DBP	GSAP	7	76940068	77045717	3.7936	739	7.4251e-05
qDEPR	EUR	SBP	CMTM8	3	32280171	32411817	3.7885	705	7.5778e-05
Top 20 genes using VEGAS2 software
qDEPR	EUR	DBP	GLTPD2	17	4692253	4693884	53.4167	7	2e-06
qDEPR	HIS	PP	TMEM199	17	26684686	26689089	61.6503	25	2e-06
qDEPR	ASN	SBP	THAP1	8	42691816	42698474	48.3896	11	5e-06
dDEPR	ASN	SBP	ZFP82	19	36882860	36909550	845.038	75	5e-06
dDEPR	ASN	DBP	THAP1	8	42691816	42698474	45.0424	11	7.99999e-06
qDEPR	EUR	SBP	GLTPD2	17	4692253	4693884	49.8145	7	8.99999e-06
dDEPR	ASN	SBP	ZNF565	19	36672961	36705986	668.107	98	1.8e-05
dDEPR	ASN	SBP	TTC7A	2	47143267	47303275	2818.76	573	1.9e-05
dDEPR	ASN	SBP	ECI1	16	2289872	2301602	370.515	33	2.1e-05
qDEPR	EUR	PP	SNORA45B	11	8706985	8707116	18.0955	1	2.2e-05
dDEPR	ASN	SBP	ZFP14	19	36825354	36870105	974.127	114	2.9e-05
dDEPR	HIS	DBP	MDP1	14	24683142	24685276	25.7846	6	3.3e-05
qDEPR	ASN	SBP	OR2T34	1	248737101	248738058	16.6433	1	3.7e-05
qDEPR	HIS	SBP	MDP1	14	24683142	24685276	25.8945	6	4.1e-05
qDEPR	AFR	DBP	MUC6	11	1012823	1036706	641.744	156	4.3e-05
qDEPR	ASN	SBP	SSUH2	3	8661085	8693764	285.562	73	5.19999e-05
qDEPR	EUR	PP	OR5AR1	11	56431161	56432094	26.8205	4	5.79999e-05
qDEPR	ASN	DBP	C14orf64	14	98391946	98444461	1215.2	204	5.89999e-05
qDEPR	HIS	PP	NFIX	19	13106583	13209610	1073.39	239	6.19999e-05
dDEPR	ASN	PP	EBNA1BP2	1	43629844	43638241	68.7893	26	6.29999e-05
Genes underlined are presented in both MAGMA and VEGAS2

## Sheet: Table S5
Table S5. Top 10 Pathways identified using MAGMA or VEGAS2Pathway
Table S9-a. Top 10 Pathways identified using MAGMA software
Exposure	Population	Pheno	Pathway	NGENES	BETA	BETA_STD	SE	P
qDEPR	HIS	SBP	GOMF_NAD_RETINOL_DEHYDROGENASE_ACTIVITY	19	0.97696	0.030722	0.19704	3.5909e-07
dDEPR	CPMA	PP	GOBP_PHOSPHATIDYLETHANOLAMINE_ACYL_CHAIN_REMODELING	11	1.3694	0.032764	0.27992	5.0313e-07
qDEPR	CPMA	SBP	GOBP_STRIATUM_DEVELOPMENT	20	0.97542	0.031431	0.20018	5.5474e-07
dDEPR	CPMA	PP	WP_BMP_SIGNALING_IN_EYELID_DEVELOPMENT	20	0.93338	0.030106	0.19158	5.5734e-07
dDEPR	CPMA	DBP	GOBP_POSITIVE_REGULATION_OF_NUCLEOTIDE_BINDING_OLIGOMERIZATION_DOMAIN_CONTAINING_2_SIGNALING_PATHWAY	5	1.6165	0.026081	0.33327	6.208e-07
qDEPR	CPMA	PP	GOMF_DIPHOSPHOTRANSFERASE_ACTIVITY	4	1.845	0.026598	0.38066	6.3239e-07
dDEPR	CPMA	SBP	GOBP_REGULATION_OF_RESPONSE_TO_STRESS	1375	0.10294	0.026541	0.021984	1.4266e-06
qDEPR	AFR	SBP	GOBP_TYPE_B_PANCREATIC_CELL_APOPTOTIC_PROCESS	10	1.1696	0.026764	0.25477	2.2236e-06
dDEPR	CPMA	DBP	GOBP_POSITIVE_REGULATION_OF_NUCLEOTIDE_BINDING_OLIGOMERIZATION_DOMAIN_CONTAINING_SIGNALING_PATHWAY	6	1.4319	0.025306	0.31471	2.7025e-06
qDEPR	HIS	DBP	GOBP_NEGATIVE_REGULATION_OF_B_CELL_PROLIFERATION	15	1.0306	0.0288	0.22697	2.8192e-06
Table S9-b. Top 10 Pathways identified from VEGAS2Pathway anlaysis using VEGAS2 software
Exposure	Population	Phenotype	Pathway	nGenesMapped	nGenesUsed	nSamples	empiricalP	Genes
qDEPR	HIS	DBP	488576_GO:0002703_regulation_of_leukocyte_mediated_immunity	164	134	100000	0.000199998	PRKCZ_VAMP3_FGR_PTAFR_IL23R_FCGR1A_FCER1A_SLAMF1_HSPA6_SH2D1B_XCL1_TNFSF4_MR1_PTPRC_CR1_SUSD4_NLRP3_RSAD2_MSH6_APLF_VAMP8_ZAP70_IL1B_DPP4_HSPD1_CD28_FZD5_CCR2_SNX4_IL20RB_IL12A_BCL6_WHSC1_STAP1_IL21_TLR2_TLR3_IL7R_F2RL1_FER_IL4_NDFIP1_HAVCR2_IL12B_SERPINB9_HFE_HLA-A_HLA-E_NCR3_AGER_TAP1_MAP3K7_STX7_ULBP3_AZGP1_LEP_GIMAP5_PAXIP1_LYN_IFNA2_EXOSC3_SYK_TLR4_TRAF2_GATA3_C10orf54_PPP3CB_IGF2_HPX_TRAF6_…
qDEPR	AFR	SBP	489475_GO:0004004_ATP-dependent_RNA_helicase_activity	62	56	100000	0.000269997	DDX20_DHX9_DDX59_DDX1_DHX57_DQX1_SNRNP200_DDX18_DHX30_DHX36_EIF4A2_DHX15_DDX4_YTHDC2_DDX46_G3BP1_DDX41_DHX16_SKIV2L_DDX43_DDX56_DDX31_SUPV3L1_DHX32_IGHMBP2_DDX10_DDX6_DDX25_DDX47_DDX23_HELB_DDX54_DDX55_DHX37_DDX51_DDX24_TDRD9_DDX28_DDX19A_DHX38_DHX33_EIF4A1_DDX52_DHX8_DHX40_DDX42_DDX5_EIF4A3_DDX39A_DDX49_TDRD12_DHX34_DHX35_DDX27_DDX17_MOV10L1
qDEPR	AFR	SBP	492529_GO:0008186_RNA-dependent_ATPase_activity	62	56	100000	0.000279997	DDX20_DHX9_DDX59_DDX1_DHX57_DQX1_SNRNP200_DDX18_DHX30_DHX36_EIF4A2_DHX15_DDX4_YTHDC2_DDX46_G3BP1_DDX41_DHX16_SKIV2L_DDX43_DDX56_DDX31_SUPV3L1_DHX32_IGHMBP2_DDX10_DDX6_DDX25_DDX47_DDX23_HELB_DDX54_DDX55_DHX37_DDX51_DDX24_TDRD9_DDX28_DDX19A_DHX38_DHX33_EIF4A1_DDX52_DHX8_DHX40_DDX42_DDX5_EIF4A3_DDX39A_DDX49_TDRD12_DHX34_DHX35_DDX27_DDX17_MOV10L1
dDEPR	EUR	PP	373889_ko05166_HTLV-I_infection	250	200	100000	0.000319997	DVL1_PIK3CD_WNT4_E2F2_LCK_CDC20_PIK3R3_CDKN2C_JUN_JAK1_PRKACB_VCAM1_WNT2B_NRAS_CRTC2_FDPS_ELK4_ATF3_TGFB2_WNT3A_AKT3_ADCY3_XPO1_PPP3R1_POLE4_IL1R1_ANAPC1_ATF2_FZD7_FZD5_WNT10A_WNT7A_KAT2B_TGFBR2_CTNNB1_WNT5A_GSK3B_ADCY5_PIK3CB_ATR_PIK3CA_DVL3_DLG1_MSX1_ANAPC4_PTTG2_PDGFRA_PPP3CA_NFKB1_MAD2L1_IL2_SLC25A31_IL15_ANAPC10_SLC25A4_TERT_ADCY2_MAP3K1_PIK3R1_APC_CSF2_VDAC1_EGR1_PDGFRB_PTTG1_MSX2_CANX_E2F3…
dDEPR	EUR	PP	373901_hsa05166_HTLV-I_infection	250	200	100000	0.000319997	DVL1_PIK3CD_WNT4_E2F2_LCK_CDC20_PIK3R3_CDKN2C_JUN_JAK1_PRKACB_VCAM1_WNT2B_NRAS_CRTC2_FDPS_ELK4_ATF3_TGFB2_WNT3A_AKT3_ADCY3_XPO1_PPP3R1_POLE4_IL1R1_ANAPC1_ATF2_FZD7_FZD5_WNT10A_WNT7A_KAT2B_TGFBR2_CTNNB1_WNT5A_GSK3B_ADCY5_PIK3CB_ATR_PIK3CA_DVL3_DLG1_MSX1_ANAPC4_PTTG2_PDGFRA_PPP3CA_NFKB1_MAD2L1_IL2_SLC25A31_IL15_ANAPC10_SLC25A4_TERT_ADCY2_MAP3K1_PIK3R1_APC_CSF2_VDAC1_EGR1_PDGFRB_PTTG1_MSX2_CANX_E2F3…
qDEPR	AFR	SBP	489268_GO:0003724_RNA_helicase_activity	64	57	100000	0.000339997	DDX20_DHX9_DDX59_DDX1_DHX57_DQX1_SNRNP200_DDX18_DHX30_DHX36_EIF4A2_DHX15_DDX4_YTHDC2_DDX46_G3BP1_DDX41_DHX16_SKIV2L_DDX43_DDX56_RAD54B_DDX31_SUPV3L1_DHX32_IGHMBP2_DDX10_DDX6_DDX25_DDX47_DDX23_HELB_DDX54_DDX55_DHX37_DDX51_DDX24_TDRD9_DDX28_DDX19A_DHX38_DHX33_EIF4A1_DDX52_DHX8_DHX40_DDX42_DDX5_EIF4A3_DDX39A_DDX49_TDRD12_DHX34_DHX35_DDX27_DDX17_MOV10L1
dDEPR	AFR	SBP	491054_GO:0006069_ethanol_oxidation	12	6	100000	0.000389996	ADH7_ALDH1B1_ALDH1A1_ALDH2_ACSS1_ACSS2
qDEPR	HIS	DBP	489895_GO:0004559_alpha-mannosidase_activity	13	13	100000	0.000399996	MAN1C1_MAN1A2_EDEM3_EDEM1_MAN2B2_MAN2A1_MANEA_MAN1A1_MAN1B1_MAN2C1_MAN2A2_MAN2B1_EDEM2
dDEPR	EUR	SBP	137939_p53downstreampathway_Direct_p53_effectors	130	122	50000	0.000579988	TP73_EPHA2_SFN_NFYC_EDN2_PLK3_JUN_GADD45A_PPM1J_MCL1_S100A2_RFWD2_BTG2_ATF3_TP53BP2_TP53I3_NLRC4_CEBPZ_MSH2_TGFA_MAP4K4_STEAP3_CASP10_MLH1_GPX1_PCBP4_BCL6_TP63_HTT_TADA2B_AFP_RCHY1_SPP1_CASP6_POU4F2_DROSHA_TAF9_JMY_VCAN_APC_CCNG1_DUSP1_RNF144B_TAP1_BAK1_CDKN1A_NFYA_PRDM1_SESN1_HDAC2_PERP_PMS2_IGFBP3_EGFR_HGF_TRRAP_SERPINE1_MET_IRF5_TNFRSF10A_BNIP3L_SNAI2_TP53INP1_RRM2B_NDRG1_TYRP1_DKK1_AIFM2_DDIT…
dDEPR	EUR	SBP	492455_GO:0008088_axo-dendritic_transport	39	38	50000	0.000719986	KIF1B_SNAPIN_KIF1A_OPA1_HTT_BLOC1S4_UCHL1_MGARP_AP3B1_AP3S1_BLOC1S5_DTNBP1_DST_NEFL_AP3M2_APBA1_AP3M1_BLOC1S2_KLC2_BLOC1S1_RAB21_HIF1A_KLC1_SPG11_BLOC1S6_AP3B2_AP3S2_SPG7_WDR81_PAFAH1B1_NDEL1_HAP1_MAPT_AP3D1_KLC3_KIF3B_APP_SOD1

## Sheet: Table S6
Table S6. Prioritized genes mapped by all SNPs in LD (r2 > 0.4) with top SNPs in FUMA
symbol	chr	start	end	type	HUGO	pLI	posMapSNPs	posMapMaxCADD	ciMap	IndSigSNPs
TGFA	2	70674412	70781325	protein_coding	TGFA	0.574368	15	12.73	No	rs10178576
CNTN6	3	1134260	1445901	protein_coding	CNTN6	3.58671e-22	4	5.26	No	rs144210569*
EIF1B	3	40351175	40353915	protein_coding	EIF1B	0.394741	0	0	Yes	rs115760284
TRAK1	3	42055294	42267381	protein_coding	TRAK1	9.70917e-05	7	4.964	Yes	rs115760284
CCK	3	42299317	42307699	protein_coding	CCK	0.0231054	0	0	Yes	rs115760284
VIPR1	3	42530791	42579059	protein_coding	VIPR1	8.27528e-10	0	0	Yes	rs115760284
ZBTB47	3	42695176	42709072	protein_coding	ZBTB47	0.97475	0	0	Yes	rs115760284
SSUH2	3	8661086	8786726	protein_coding	SSUH2	2.48998e-08	6	5.88	No	rs59284269
CAV3	3	8775486	8883492	protein_coding	CAV3	0.339836	6	5.88	No	rs59284269
PRIMPOL	4	185570767	185616117	protein_coding	PRIMPOL	2.78746e-13	6	6.772	No	rs113521945
CENPU	4	185615772	185655287	protein_coding	CENPU	0.000144352	6	5.933	No	rs113521945
ACSL1	4	185676749	185747972	protein_coding	ACSL1	0.0918373	27	13.69	No	rs113521945
RFC1	4	39289076	39367995	protein_coding	RFC1	0.175487	0	0	Yes	rs145132348
UGDH	4	39500375	39529931	protein_coding	UGDH	5.54141e-05	0	0	Yes	rs145132348
SMIM14	4	39547950	39640710	protein_coding	SMIM14	0.742727	4	6.111	Yes	rs145132348
UBE2K	4	39699664	39784412	protein_coding	UBE2K	0.962613	3	2.412	Yes	rs145132348
PDS5A	4	39824483	39979576	protein_coding	PDS5A	0.999853	0	0	Yes	rs145132348
MAGI2	7	77646393	79082890	protein_coding	MAGI2	0.883174	4	5.932	No	rs147967138
DOCK4	7	111366166	111846466	protein_coding	DOCK4	0.998536	7	18.21	No	rs757194
ZNF277	7	111846643	111983151	protein_coding	ZNF277	4.86866e-14	49	18.21	No	rs757194
IFRD1	7	112063023	112121072	protein_coding	IFRD1	0.105462	1	4.81	Yes	rs757194
SLCO1A2	12	21417534	21572528	protein_coding	SLCO1A2	5.58441e-15	2	3.001	No	rs7979305
PYROXD1	12	21590549	21623300	protein_coding	PYROXD1	3.50579e-07	18	5.872	No	rs7979305
RECQL	12	21621845	21654603	protein_coding	RECQL	7.14017e-13	5	3.853	No	rs7979305
ETNK1	12	22778009	22843599	protein_coding	ETNK1	0.86513	0	0	Yes	rs7979305
GRASP	12	52400724	52409673	protein_coding	GRASP	0.930937	2	5.25	No	rs114544309
HS6ST3	13	96743093	97485671	protein_coding	HS6ST3	0.747378	12	13.36	No	rs75095906
OXGR1	13	97637973	97646984	protein_coding	OXGR1	0.000863936	0	0	No	rs75095906
GAN	16	81348557	81424489	protein_coding	GAN	0.0363499	0	0	No	rs9931605
CMIP	16	81478775	81745367	protein_coding	CMIP	0.999887	19	12.4	No	rs9931605
OR1A1	17	3118915	3119844	protein_coding	OR1A1	0.000357575	6	9.698	No	rs140618249
*rs144210569 in high LD (r2 > 0.8, D'=1) with rs148780833 (Locus #5) based on TopLD1 African reference, which is not present in the 1000G Phase3 reference panel (FUMA)
1Le Huang*, Jon Rosen*, Quan Sun* et al. TOP-LD: A tool to explore linkage disequilibrium with TOPMed wholegenome sequence data. the American Journal of Human Genetics (2022).

## Sheet: Table S7
Table S7. Functional annotations of the novel and known loci in the dDEPR and qDEPR analyses
Locus	CHR:position	Alleles (E/A)	rsID	Nearest gene	position	FUMA mapped genes	xQTL-associated genes	PheWAS
novel and known loci in the dDEPR analyses
1q31.3	1:194548555	A/G	rs1664073690*	CDC73	intergenic
2q13.3	2:70509396	C/T	rs10178576*	TGFA	intronic	TGFA	TGFA (eQTL in monocyte)
3p22.1	3:42213248	G/T	rs115760284	TRAK1	Intronic	EIF1B, TRAK1, CCK, VIPR1, ZBTB47	TRAK1 (eQTL in monocyte)
4q35.1	4:184777291	A/G	rs113521945*	ACSL1	intronic	ACSL1, PRIMPOL, CENPU	PRIMPOL (eQTL in brain, hQTL and mQTL in blood, apaQTL in lymphocyte), CENPU (eQTL in brain, mQTL in blood), CASP3 (sQTL in brain), ACSL1 (mQTL in blood)	mean platelet volume (P=10-5); Clonazepam* (P=8x10-5); red blood cell count (P=6x10-5)
7q21.11	7:78342531	A/T	rs147967138	MAGI2	Intronic	MAGI2
7q31.1	7:112203372	A/G	rs757194	DOCK4	Intronic	DOCK4, ZNF277, IFRD1
12p12.1	12:21435910	C/T	rs7979305	PYROXD1	intergenic	SLCO1A2, PYROXD1, RECQL, ETNK1
13q32.1	13:96826633	A/G	rs75095906	HS6ST3	Intronic	HS6ST3, OXGR1	UGGT2 (eQTL in brain), HS6ST3 (mQTL in blood)	Platelet count (P=4x10-6), Aortic valve disease (P= 4x10-4)
16q23.2	16:81545886	C/T	rs9931605	CMIP	Intronic	GAN, CMIP	CMIP (mQTL in blood and lymphocyte)	Platelet count (P=4x10-6), Major depressive disorder (probable) (P=0.002)
novel and known loci in the qDEPR analyses
2q14.2	2:118537183	A/G	rs77572777*	RP11-19E11.1	intergenic		DBI (eQTL in brain)	ADHD vs obsessive compulsive disorder (P= 0.0046), Daytime nap (P= 4x10-4)
3p26.3	3:1301059	C/T	rs148780833*	CNTN6	intronic	CNTN6
3p25.3	3:8726816	A/G	rs59284269	SSUH2	intronic	SSUH2, CAV3		Ongoing addiction to alcohol (P= 6x10-4)
3q13.11	3:104214171	C/CA	rs748650739*	RP11-40M23.1	intergenic
4p14	4:39689605	C/T	rs145132348	UBE2K	intergenic	RFC1, UGDH, SMIM14, UBE2K, PDS5A
12q13.13	12:52010638	C/T	rs114544309	GRASP	intronic	GRASP		Mean platelet volume (P=0.004)
17p13.3	17:3225579	C/T	rs140618249*	OR1A1	intergenic	OR1A1
Clonazepam*: medication to treat and prevent anxiety and seizure disorders
*SNPs in bold represent the top SNPs in novel loci

## Sheet: Table S8
Table S8. FUMA gene set enrichment analysis of the 36 priortized gene mapped to novel and known loci
Category	GeneSet	N_genes	N_overlap	p	adjP	genes	link
Hallmark_gene_sets	HALLMARK_MYOGENESIS	197	4	0.000201333	0.0100667	CAV3:VIPR1:ACSL1:IFRD1	http://www.gsea-msigdb.org/gsea/msigdb/human/geneset/HALLMARK_MYOGENESIS
Immunologic_signatures	GSE17721_POLYIC_VS_PAM3CSK4_1H_BMDC_UP	193	5	9.25617e-06	0.048308	EIF1B:RFC1:SMIM14:MAGI2:RECQL	http://www.gsea-msigdb.org/gsea/msigdb/human/geneset/GSE17721_POLYIC_VS_PAM3CSK4_1H_BMDC_UP
microRNA_targets	MIR203B_3P	91	4	9.88476e-06	0.0254089	SLCO1A2:PYROXD1:ETNK1:GAN	http://www.gsea-msigdb.org/gsea/msigdb/human/geneset/MIR203B_3P
microRNA_targets	MIR372_5P	238	5	2.5412e-05	0.0254089	SMIM14:UBE2K:PDS5A:RECQL:OXGR1	http://www.gsea-msigdb.org/gsea/msigdb/human/geneset/MIR372_5P
microRNA_targets	MIR6795_5P	129	4	3.91207e-05	0.0254089	TRAK1:UBE2K:CASP3:CMIP	http://www.gsea-msigdb.org/gsea/msigdb/human/geneset/MIR6795_5P
microRNA_targets	MIR6887_5P	129	4	3.91207e-05	0.0254089	TRAK1:UBE2K:CASP3:CMIP	http://www.gsea-msigdb.org/gsea/msigdb/human/geneset/MIR6887_5P

## Sheet: Table S9
Table S9. Top candidate drug-gene interactions for protein-coding targets at dDEPR and qDEPR loci.
Exposure	chr	ensg	HGNC	symbol	UniProt	Complexes	GO_processes	Reactome_KEGG_pathways	IDG_target_level	Target_category	DGIdb_interactions	Top_Drug_Name	Top_Approved_Drug_Name	Top_Drug_Indication	Top_ChEMBL_ID	Top_interaction_score	Total_approved_drugs	Total_active_ligands
dDEPR	2	ENSG00000163235	11765	TGFA	P01135	NA	activation of MAPK activity; positive regulation of epidermal growth factor-activated receptor activity; positive regulation of epithelial cell proliferation	Asparagine N-linked glycosylation; COPII-mediated vesicle transport; Cargo concentration in the ER; PI3K-Akt signaling pathway; EGFR tyrosine kinase inhibitor resistance	Tbio	DRUGGABLE GENOME; GROWTH FACTOR; GROWTH FACTOR	3	FEPIXNEBART	PANITUMUMAB	antineoplastic agent	CHEMBL4594573	6.56346	2	NA
qDEPR	2	ENSG00000155368	2690	DBI	P07108	NA	long-chain fatty acyl-CoA binding; protein dimerization activity; benzodiazepine receptor binding; lipid binding	Fatty acid metabolism; Mitochondrial Fatty Acid Beta-Oxidation; Metabolism of lipids; PPAR signaling pathway	Tbio		0						NA	NA
dDEPR	3	ENSG00000182606	29947	TRAK1	Q9UPV9	OGT-TRAK1-TRAK2 complex; PINK1-MIRO2-Milton complex; MIRO2-Milton complex	endosome to lysosome transport; anterograde axonal transport; anterograde axonal transport of mitochondrion; mitochondrion distribution	Oncogenic MAPK signaling; Signaling by BRAF and RAF fusions; Vitamin D receptor pathway	Tbio		0						NA	NA
qDEPR	3	ENSG00000134115	2176	CNTN6	Q9UQ52	NA	axon guidance; dendrite self-avoidance; homophilic cell adhesion via plasma membrane adhesion molecules	Axon guidance; CHL1 interactions; L1CAM interactions	Tbio		0						NA	NA
qDEPR	3	ENSG00000182533	1529	CAV3	P56539	Beta-dystroglycan-caveolin-3 complex; Caveolar macromolecular signaling complex, using anti-Cav-3; Caveolar macromolecular signaling complex	caveola assembly; negative regulation of calcium ion transport; regulation of calcium ion import; regulation of calcium ion transmembrane transporter activity	Muscle contraction; Smooth Muscle Contraction; Focal adhesion; Endocytosis; Fluid shear stress and atherosclerosis	Tbio	CELL SURFACE; TRANSPORTER	0						NA	NA
qDEPR	3	ENSG00000125046	24809	SSUH2	Q9Y2M2	NA	odontogenesis	Passive transport by Aquaporins; Cell surface interactions at the vascular wall; Signaling by NTRK2 (TRKB)	Tbio		0						NA	NA
dDEPR	3	ENSG00000114784	30792	EIF1B	O60739	NA	regulation of translational initiation	RNA transport	Tbio		0						NA	NA
dDEPR	3	ENSG00000114812	12694	VIPR1	P32241	NA	G protein-coupled receptor signaling pathway, coupled to cyclic nucleotide second messenger	Class B/2 (Secretin family receptors); Neuroactive ligand-receptor interaction	Tchem	DRUGGABLE GENOME; G PROTEIN COUPLED RECEPTOR	2	VASOACTIVE INTESTINAL PEPTIDE	VASOACTIVE INTESTINAL PEPTIDE	for treatment of erectile dysfunction	CHEMBL525028	6.56346	2	14
dDEPR	3	ENSG00000114853	26955	ZBTB47	Q9UFB7	NA	cellular response to DNA damage stimulus	Generic Transcription Pathway; RNA Polymerase II Transcription	Tdark		0						NA	NA
dDEPR	3	ENSG00000187094	1569	CCK	P06307	NA	digestion; axonogenesis; axonogenesis; G protein-coupled receptor signaling pathway	Class A/1 (Rhodopsin-like receptors); Pancreatic secretion; Neuroactive ligand-receptor interaction; Insulin secretion	Tbio	DRUGGABLE GENOME; ENZYME; HORMONE ACTIVITY	3	VIRGINIAMYCIN M1	DIAZOXIDE	Antihypertensive Agents; Vasodilator Agents	CHEMBL181	35.0051	3	NA
dDEPR	4	ENSG00000151726	3569	ACSL1	P33121	NA	long-chain fatty acid metabolic process; long-chain fatty-acyl-CoA biosynthetic process; arachidonate-CoA ligase activity	Fatty acid metabolism; Fatty acyl-CoA biosynthesis; Adipocytokine signaling pathway	Tchem	EXTERNAL SIDE OF PLASMA MEMBRANE	9	VS-4718	ADENOSINE PHOSPHATE		CHEMBL3040440	5.83419	1	19
dDEPR	4	ENSG00000151725	21348	CENPU	Q71F23	CENP-A nucleosome associated complex; CENP-A NAC-CAD complex; CEN complex	CENP-A containing nucleosome assembly; chordate embryonic development; viral process	Amplification of signal from unattached kinetochores via a MAD2 inhibitory signal; Amplification of signal from the kinetochores; Cell cycle	Tbio		0						NA	NA
dDEPR	4	ENSG00000164306	26575	PRIMPOL	Q96LW4	NA	response to UV; mitochondrial DNA replication; replication fork processing	HDR through Homologous Recombination (HRR) or Single Strand Annealing (SSA)	Tbio	DRUGGABLE GENOME	0						NA	NA
dDEPR	4	ENSG00000164305	1504	CASP3	P42574	NA	erythrocyte differentiation; execution phase of apoptosis; neurotrophin TRK receptor signaling pathway	Activation of caspases through apoptosome-mediated cleavage; Apoptosis; Apoptosis induced DNA fragmentation	Tchem	DRUGGABLE GENOME; ENZYME; PROTEASE	45	PHATHALIMIDE	PACLITAXEL	for treatment of peripheral arterial disease (PAD),DMARD,antiinflammatory agent,antineoplastic agent	CHEMBL261567	2.33367	5	854
qDEPR	4	ENSG00000035928	9969	RFC1	P35251	BASC (Ab 80) complex (BRCA1-associated genome surveillance complex); BASC (Ab 81) complex (BRCA1-associated genome surveillance complex); BASC complex (BRCA1-associated genome surveillance complex); BRD4-RFC complex; DNA synthesome complex (13 subunits); DNA synthesome complex (15 subunits); DNA synthesome complex (17 subunits); DNA synthesome core complex; RC complex (Replication competent compl…	DNA clamp unloading; DNA damage response, detection of DNA damage; DNA-dependent DNA replication; error-free translesion synthesis	Base Excision Repair; Cell Cycle; Mismatch repair; DNA replication	Tbio	DNA REPAIR	1	PRALATREXATE		Antineoplastic Agents,antineoplastic agent	CHEMBL1201746	17.5026	1	NA
qDEPR	4	ENSG00000109814	12525	UGDH	O60701	NA	glycosaminoglycan biosynthetic process; UDP-glucose metabolic process; UDP-glucuronate biosynthetic process	Biological oxidations; Formation of the active cofactor, UDP-glucuronate; Glucuronidation; Ascorbate and aldarate metabolism; Amino sugar and nucleotide sugar metabolism	Tbio		1	ASPIRIN	ASPIRIN	NSAID,antithrombotic,anticoagulant	CHEMBL25	0.74479	1	NA
qDEPR	4	ENSG00000163683	27321	SMIM14	Q96QK8	NA	blastocyst hatching	E3 ubiquitin ligases ubiquitinate target proteins; Protein ubiquitination; Mitochondrial biogenesis	Tdark		0						NA	NA
qDEPR	4	ENSG00000078140	4914	UBE2K	P61086	NA	free ubiquitin chain polymerization; positive regulation of peptidyl-threonine phosphorylation; protein K48-linked ubiquitination; cellular response to interferon-beta	Adaptive Immune System; Antigen processing: Ubiquitination & Proteasome degradation; Class I MHC mediated antigen processing & presentation; DDX58/IFIH1-mediated induction of interferon-alpha/beta; Ubiquitin mediated proteolysis	Tbio	ENZYME	3	HISTIDINE	HISTAMINE	cytorprotective agent during cancer treatment	CHEMBL17962	2.18782	2	NA
qDEPR	4	ENSG00000121892	29088	PDS5A	Q29RF7	CDCA5-PDS5A-RAD21-SMC1A-PDS5B-SMC3 complex; Sororin-cohesin complex	mitotic sister chromatid cohesion; negative regulation of DNA replication; DNA repair; cell division	Cell Cycle, mitotic; Cohesin Loading onto Chromatin; Establishment of Sister Chromatid Cohesion; M Phase	Tbio	DNA REPAIR	0						NA	NA
dDEPR	7	ENSG00000187391	18957	MAGI2	Q86UL8	ActRIIA-ActRIB-Smad3-Arip1 complex	negative regulation of protein kinase B signaling; positive regulation of phosphoprotein phosphatase activity; positive regulation of receptor internalization	Cell-Cell communication; Nephrin family interactions; PI3K-Akt signaling pathway; Rap1 signaling pathway	Tbio	KINASE; TRANSPORTER	0						NA	NA
dDEPR	7	ENSG00000128512	19192	DOCK4	Q8N1I0	NA	cell chemotaxis; negative regulation of vascular smooth muscle contraction; positive regulation of vascular associated smooth muscle cell migration; small GTPase mediated signal transduction	Factors involved in megakaryocyte development and platelet production; Hemostasis; Rap1 signaling pathway	Tbio		0						NA	NA
dDEPR	7	ENSG00000006652	5456	IFRD1	O00458	NA	myoblast fate determination; striated muscle tissue development; cell differentiation; negative regulation of axon extension; muscle cell differentiation; skeletal muscle tissue regeneration; negative regulation of collateral sprouting	NA	Tbio		0						NA	NA
dDEPR	7	ENSG00000198839	13070	ZNF277	Q9NRM2	NA	cellular response to hydrogen peroxide; regulation of cellular senescence	Protein methylation; rRNA modification in the nucleus and cytosol; karyotic Translation Termination	Tbio		0						NA	NA
dDEPR	12	ENSG00000084453	10956	SLCO1A2	P46721	NA	bile acid and bile salt transport; sodium-independent organic anion transport; organic anion transport	Bile secretion	Tbio	DRUGGABLE GENOME; TRANSPORTER	12	NARINGIN	RIFAMYCIN SV		CHEMBL2105680	4.37564	7	2
dDEPR	12	ENSG00000004700	9948	RECQL	P46063	NA	DNA strand renaturation; DNA duplex unwinding; DNA recombination; DNA repair	DNA IR-damage and cellular response via ATR	Tbio	DRUGGABLE GENOME; ENZYME; DNA REPAIR	174	PEPSTATIN	AMPICILLIN (ANHYDROUS)		CHEMBL296588	0.301768	40	NA
dDEPR	12	ENSG00000121350	26162	PYROXD1	Q8WU10	NA	cellular response to oxidative stress	Mitochondrial iron-sulfur cluster biogenesis; Metabolism of steroid hormones	Tbio	DRUGGABLE GENOME	0						NA	NA
qDEPR	12	ENSG00000161835	18707	GRASP	Q7Z6J2	GRASP-GRP1 complex	signal transduction; protein localization; regulation of neurotransmitter receptor transport, endosome to postsynaptic membrane	Activation of NMDA receptors and postsynaptic events; L1CAM interactions; Neurotransmitter receptors and postsynaptic signal transmission; Netrin-1 signaling	Tbio		0						NA	NA
dDEPR	12	ENSG00000139163	24649	ETNK1	Q9HBU6	NA	ethanolamine kinase activity; ATP binding	Glycerophospholipid biosynthesis; Glycerophospholipid metabolism; Metabolic pathways	Tbio	ENZYME; KINASE	0						NA	NA
dDEPR	13	ENSG00000185352	19134	HS6ST3	Q8IZP7	NA	heparan sulfate proteoglycan biosynthetic process, enzymatic modification	Glycosaminoglycan metabolism; HS-GAG biosynthesis; Heparan sulfate/heparin (HS-GAG) metabolism; Glycosaminoglycan biosynthesis - heparan sulfate / heparin	Tdark	ENZYME	0						NA	NA
dDEPR	13	ENSG00000165621	4531	OXGR1	Q96P68	NA	G protein-coupled receptor signaling pathway	Expression and translocation of olfactory receptors; Olfactory Signaling Pathway; G alpha (i) signalling events; Class A/1 (Rhodopsin-like receptors)	Tchem	DRUGGABLE GENOME; G PROTEIN COUPLED RECEPTOR	0						NA	NA
dDEPR	13	ENSG00000102595	15664	UGGT2	Q9NYU1	NA	ER-associated misfolded protein catabolic process; protein N-linked glycosylation via asparagine; endoplasmic reticulum mannose trimming	Protein processing in endoplasmic reticulum; Asparagine N-linked glycosylation; Calnexin/calreticulin cycle; ER Quality Control Compartment (ERQC)	Tbio		1	HYDROCHLOROTHIAZIDE	HYDROCHLOROTHIAZIDE	antihypertensive agent	CHEMBL435	2.28294	1	NA
dDEPR	13	ENSG00000261609	4137	GAN	Q9H2C0	NA	protein ubiquitination; post-translational protein modification; cytoskeleton organization	Adaptive Immune System; Antigen processing: Ubiquitination & Proteasome degradation; Class I MHC mediated antigen processing & presentation		DRUGGABLE GENOME	0						NA	NA
dDEPR	16	ENSG00000153815	24319	CMIP	Q8IY22	NA	NA	Thrombin signalling through proteinase activated receptors (PARs); Signaling by NOTCH2	Tbio		0						NA	NA
qDEPR	17	ENSG00000172146	8179	OR1A1	Q9P1Q5	NA	G protein-coupled receptor signaling pathway	G alpha (s) signalling events; GPCR downstream signalling; Olfactory Signaling Pathway	Tbio	DRUGGABLE GENOME; G PROTEIN COUPLED RECEPTOR	0						NA	NA
qDEPR	17	ENSG00000182327	33756	GLTPD2	A6NH11	NA	ceremide transport; intermembrane lipid transfer	Glycosphingolipid transport; PI Metabolism	Tdark		0						NA	NA
qDEPR	17	ENSG00000244045	18085	TMEM199	Q8N511	NA	cellular iron ion homeostasis; cellular response to increased oxygen levels; lysosomal lumen acidification	ROS and RNS production in phagocytes; Iron uptake and transport; Signaling by Insulin receptor	Tbio	ENZYME; TRANSPORTER	0						NA	NA
Notes: Used DGIdb, Pharos, DrugBank and ChEMBL databases. Target genes with approved drugs are highlighted in grey.

## Sheet: Table S10
Table S10. Top approved drugs and indications for protein-coding target genes at dDEPR and qDEPR loci.
Exposure	Chr	Target_gene	Pharmacologically_active	Action	Drug_generic	Drug_groups	First_approval	Summary	ChEMBL_ID	DrugBank_ID	Trade_names	Type	Route	LatePhaseTrials	LatestPhase	MESH_Indications	MESH_Description	DrugBank_Indications	RecentClinicalTrials	Status	Purpose	Title
dDEPR	2	TGFA	unknown	NA	Panitumumab	approved, investigational	2006	Panitumumab is a recombinant humanized monoclonal antibody used to treat EGFR-expressing, metastatic colorectal carcinoma that is refractory to fluoropyrimidine-, oxaliplatin-, and irinotecan- containing chemotherapy regimens.	CHEMBL1201827	DB01269	Vectibix	Biotech	Intravenous	21	4	D009369; D015179; D006258; D002294; D003110	Neoplasms; Colorectal Neoplasms; Head and Neck Neoplasms; Carcinoma, Squamous Cell; Colonic Neoplasms	DBCOND0029029 (Colon Cancer); DBCOND0067925 (Unresectable Metastasis Originating in Colonic Cancer); DBCOND0020966 (Cancer); DBCOND0028391 (Colorectal Cancer); DBCOND0134580 (Metastatic Colorectal Cancer (CRC))	NCT02015923; NCT02301962; NCT03635021; NCT05198934; NCT01910610	Terminated; Unknown Status; Active Not Recruiting; Active Not Recruiting	Health Services Research; Treatment; Treatment; Treatment	Resection vs no Resection of the Primary in Colorectal Cancer With Unresectable Metastases; Phase IV Panitumumab Study in Indian Subjects With Metastatic Colorectal Cancer; Study to Evaluate the Efficacy of FOLFOX + Panitumumab Followed by FOLFIRI + Bevacizumab (Sequence 1) Versus FOLFOX + Bevacizumab Followed by FOLFIRI + Panitumumab (Sequence 2) in Untreated Patients With Wild-type RAS Metastat…
dDEPR	3	VIPR1	unknown	activator	Aviptadil	approved, investigational	2000	Aviptadil is an injectable synthetic form of vasoactive intestinal peptide, also known as vasoactive intestinal polypeptide or VIP, is a peptide hormone that is vasoactive in the intestine.	CHEMBL1981592	DB18634	Zyesami, RLF100, Samivir, SamiVIP, SamiAIR	Small Molecule	Intravenous	4	3	D045169; D012128; D055371; D000086382	Severe Acute Respiratory Syndrome; Respiratory Distress Syndrome; Acute Lung Injury; COVID-19	DBCOND0129755 (Coronavirus Disease 2019 (COVID‑19));	NCT04843761; NCT04311697; NCT05137795; NCT04360096	Completed; Completed; Withdrawn; Terminated	Treatment; Treatment; Treatment; Treatment	ACTIV-3b: Therapeutics for Severely Ill Inpatients With COVID-19; Intravenous Aviptadil for Critical COVID-19 With Respiratory Failure (COVID-AIV); Inhaled ZYESAMI (Aviptadil Acetate) for Treatment of Severe COVID-19 (AVICOVID-3); Inhaled ZYESAMI™ (Aviptadil Acetate) for the Treatment of Severe COVID-19 (AVICOVID-2)
dDEPR	3	VIPR1	unknown	NA	Aldesleukin	approved	1992	Aldesleukin is a recombinant analog of interleukin-2 used to induce an adaptive immune response in the treatment of renal cell carcinoma.	CHEMBL1201438	DB00041	Proleukin	Biotech	Intravenous; Parenteral; Subcutaneous	31	4	D009369; D008545; D003882; D015477; D009190	Neoplasms; Melanoma; Dermatomyositis; Leukemia, Myelomonocytic, Chronic; Myelodysplastic Syndromes	DBCOND0029883 (Acute Myeloid Leukemia); DBCOND0123126 (Metastatic Renal Cell Carcinoma ( mRCC)); DBCOND0030058 (Metastatic Melanoma); DBCOND0032584 (Renal Cancer); DBCOND0028338 (Liver Disease); DBCOND0024553 (Transplantations)	NCT01347996; NCT00414765; NCT00006864; NCT02949492	Completed; Completed; Completed; Terminated	Treatment; Treatment; Treatment; Treatment	Maintenance Therapy With Ceplene® (Histamine) and IL-2 on Immune Response and MRD in Acute Myeloid Leukemia; Aldesleukin in Participants With Metastatic Renal Cell Carcinoma or Metastatic Melanoma; Interleukin-2 in Treating Patients With Metastatic Kidney Cancer; Low-dose IL-2 for Treg Expansion and Tolerance (LITE)
dDEPR	3	CCK	unknown	inhibitor	Camostat	approved, experimental	2006	Camostat is a serine protease indicated in Japan to treat chronic pancreatitis.	CHEMBL590799	DB13729	Camostat	Small Molecule	Oral	5	4	D006470; D045169; D011504	Hemorrhage; Severe Acute Respiratory Syndrome; Protein-Losing Enteropathies	DBCOND0127821 (COVID); DBCOND0129755 (Coronavirus Disease 2019 (COVID‑19)); DBCOND0129755 (Coronavirus Disease 2019 (COVID‑19)); DBCOND0129755 (Coronavirus Disease 2019 (COVID‑19)); DBCOND0030588 (Seasonal Allergic Rhinitis); DBCOND0129755 (Coronavirus Disease 2019 (COVID‑19))	NCT04338906; NCT04657497; NCT04608266; NCT04730206; NCT04355052	Withdrawn; Completed; Terminated; Terminated; Unknown Status	Treatment; Treatment; Treatment; Treatment; Treatment	Combination Therapy With Camostat Mesilate + Hydroxychloroquine for COVID-19; A Study of FOY-305 in Patients With SARS-Cov-2 Infection (COVID-19); CAMOVID : Evaluation of Efficacy and Safety of Camostat Mesylate for the Treatment of SARS-CoV-2 Infection - COVID-19 in Ambulatory Adult Patients; The DAWN Antivirals Trial for Ambulatory COVID-19 Patients; Open Label Study to Compare Efficacy, Safety…
dDEPR	3	CCK	unknown	NA	Diazoxide	approved	1973	Diazoxide is a non diuretic benzothiadiazine indicated for the management of hypoglycemia in patients who produce an excess of insulin caused by a variety of conditions.	CHEMBL181	DB01119	Proglycem	Small Molecule	Oral; Intravenous; Intramuscular	6	4	D007516; D007003; D006973; D006946; D009765	Adenoma, Islet Cell; Hypoglycemia; Hypertension; Hyperinsulinism; Obesity	DBCOND0081288 (Metabolism Disorder, Glucose); DBCOND0029752 (Type 2 Diabetes Mellitus); DBCOND0020377 (Hyperglycemia); DBCOND0020360 (Hypoglycemia); DBCOND0029465 (Type 1 Diabetes Mellitus); DBCOND0031993 (Hypoglycemia Unawareness); DBCOND0029465 (Type 1 Diabetes Mellitus); DBCOND0029465 (Type 1 Diabetes Mellitus); DBCOND0063370 (Gastroenteropancreatic Neuroendocrine Tumors)	NCT01028846; NCT03608163; NCT01488136; NCT00131755; NCT02779257	Active Not Recruiting; Active Not Recruiting; Completed; Completed; Withdrawn	Basic Science; Prevention; Prevention; Treatment; Treatment	Central Mechanisms That Regulate Glucose Metabolism in Humans; Novel Approach for the Prevention of Hypoglycemia Associated Autonomic Failure (HAAF); Use of Diazoxide in Acute Hypoglycaemia; Efficacy of Diazoxide in Type 1 Diabetes; Pasireotide Treatment for Neuroendocrine Tumor
dDEPR	3	CCK	unknown	NA	Chlorpromazine	approved, investigational, vet approved	1957	Chlorpromazine is a phenothiazine antipsychotic used to treat nausea, vomiting, preoperative anxiety, schizophrenia, bipolar disorder, and severe behavioral problems in children.	CHEMBL71	DB00477	Thorazine, Elmarin, Largactil, Megaphen	Small Molecule	Oral; Intramuscular; Intravenous; Rectal	11	4	D019955; D012559; D011618; D011164; D020250	Conduct Disorder; Schizophrenia; Psychotic Disorders; Porphyrias; Postoperative Nausea and Vomiting	DBCOND0017779 (Agitation); DBCOND0018607 (Aggression); DBCOND0084621 (Psychiatric Emergency); DBCOND0034367 (Bipolar Disorder (BD)); DBCOND0033299 (Schizoaffective Disorders); DBCOND0018504 (Schizophrenia); DBCOND0018504 (Schizophrenia)	NCT03639558; NCT00202293; NCT00654576; NCT00169039	Completed; Completed; Completed; Terminated	Treatment; Treatment; Treatment; Treatment	TREC-Lebanon: A Trial for Rapid Tranquilisation for Agitated Patients in the Emergency Setting; Comparison of Combination Olanzapine+Lithium or Chlorpromazine+Lithium in Treatment of First Manic Episode With Psychotic Features; Effectiveness of Antipsychotic Combination With Psychosocial Intervention on Outcome of Patients With Schizophrenia; Clozapine Versus Chlorpromazine for Treatment-Unrespon…
dDEPR	4	ACSL1	unknown	product of	Adenosine phosphate	approved, investigational, nutraceutical, withdrawn	NA	Adenosine phosphate, or adenylic acid, is an adenine nucleotide containing one phosphate group esterified to the sugar moiety in the 2'-, 3'-, or 5'-position. Adenosine phosphate was withdrawn by the FDA since it was considered neither safe nor effective for its intended uses as a vasodilator and an anti-inflammatory	CHEMBL752	DB00131	My-B-Den	Small Molecule	Oral	1	4	D007511	Ischemia	DBCOND0013565 (Asthma)		Unknown Status	Not Available
dDEPR	4	CASP3	unknown	negative modulator	Minocycline	approved, investigational	1971	Minocycline is a tetracycline analog used to treat a wide variety of infections in the body.	CHEMBL1434	DB01017	Amzeeq, Arestin, Dynacin, Minocin, Minolira, Solodyn, Ximino, Zilxi	Small Molecule	Oral	69	4	D007239; D000152; D001424; D010518; D009956	Infections; Acne Vulgaris; Bacterial Infections; Periodontitis; Psittacosis	DBCOND0031958 (Stress, Psychological); DBCOND0039043 (Motivation); DBCOND0019774 (Rosacea); DBCOND0068315 (Antibiotic Resistant Bacteria); DBCOND0018504 (Schizophrenia); DBCOND0033424 (Tobacco Use); DBCOND0048800 (Chronic Kidney Disease (CKD))	NCT06044090; NCT05014906; NCT02030912; NCT02968602; NCT02618317	Completed; Completed; Completed; Completed; Completed	Basic Science; Basic Science; Health Services Research; Other; Prevention	Brain and Stress Study; Efficacy of Oral Minocycline (Solodyn) and Oral Minocycline (Solodyn) Plus Azelaic Acid (Finacea) for Acne Rosacea; Effect of Minocycline & Amoxicillin on Antibiotic Resistant Bacteria and Indigenous Microbiotas; Minocycline and Tobacco Craving in Smokers With Schizophrenia; Comparison of Effectiveness and Safety of Three Lock Solutions for Long-Term Central Venous Cathete…
dDEPR	4	CASP3	unknown	inhibitor; downregulator	Acetylsalicylic acid	approved, vet approved	1950	Aspirin is a salicylate used to treat pain, fever, inflammation, migraines, and reducing the risk of major adverse cardiovascular events.	CHEMBL25	DB00945	Aggrenox, Alka-seltzer, Alka-seltzer Fruit Chews, Anacin, Arthriten Inflammatory Pain, Ascomp, Aspi-cor, Aspir-low, Bayer Aspirin, Bayer Womens, Bc Arthritis, Bc Original Formula, Bufferin, Duoplavin, Durlaza, Ecotrin, Ecpirin, Endodan Reformulated May 2009, Equagesic, Exaprin, Excedrin, Excedrin PM Triple Action, Fasprin, Fiorinal, Goody's Body Pain, Goody's Extra Strength, Goody's PM, Miniprin,…	Small Molecule	Ophthalmic; Oral; Respiratory (inhalation); Topical	522	4	D009120; D013035; D006261; D001168; D013927	Muscle Cramp; Spasm; Headache; Arthritis; Thrombosis	DBCOND0000503 (Atrial Fibrillation); DBCOND0020609 (Stroke); DBCOND0020966 (Cancer); DBCOND0027886 (Diabetes Mellitus); DBCOND0032938 (Acute Coronary Syndrome (ACS)); DBCOND0027936 (Arterial Occlusive Diseases); DBCOND0027897 (Myocardial Ischemia); DBCOND0134620 (Syndrome Heart Disease); DBCOND0020194 (Arteriosclerosis); DBCOND0057913 (Cardiovascular Disease (CVD)); DBCOND0032937 (Coronary Artery…	NCT02168829; NCT01968798; NCT00135226; NCT04609111; NCT04624854	Active Not Recruiting; Active Not Recruiting; Active Not Recruiting; Active Not Recruiting; Active Not Recruiting; Treatment	Prevention; Prevention; Prevention; Treatment	Optimal Anticoagulation for Higher Risk Patients Post-Catheter Ablation for Atrial Fibrillation Trial; ASPREE Cancer Endpoints Study; ASCEND: A Study of Cardiovascular Events iN Diabetes; ShorT and OPtimal Duration of Dual AntiPlatelet Therapy-3 Study; Dual Anti-Platelet Therapy in Patients With Coronary Multi-Vessel Disease (DAPT-MVD)
dDEPR	4	CASP3	unknown	activator	Pamidronic acid	approved	1991	Pamidronic acid is a bisphosphonate used to treat Paget's disease, to treat hypercalcemia of malignancy, and to treat osteolytic bone lesions.	CHEMBL834	DB00282	Pamisol	Small Molecule	Intravenous; Parenteral	15	4	D001847; D009101; D010013; D001943; D010024	Bone Diseases; Multiple Myeloma; Osteogenesis Imperfecta; Breast Neoplasms; Osteoporosis	DBCOND0028036 (Breast Cancer); DBCOND0047286 (Castration Resistant Prostate Cancer); DBCOND0028461 (Metastatic Cancer); DBCOND0028036 (Breast Cancer); DBCOND0031952 (Bone Loss); DBCOND0028036 (Breast Cancer); DBCOND0028461 (Metastatic Cancer); DBCOND0028036 (Breast Cancer); DBCOND0062462 (Prostate Cancer)	NCT04549207; NCT00128297; NCT00738257; NCT01907880; NCT02721433	Active Not Recruiting; Completed; Completed; Completed; Completed	Treatment; Other; Treatment; Treatment; Treatment	Comparing Continuation or De-escalation of Bone Modifying Agents (BMA) in Patients Treated for Over 2 Years for Bone Metastases From Either Breast or Castration-resistant Prostate Cancer; Pamidronate Administration in Breast Cancer Patients With Bone Metastases; A Prospective, Multicentre, Open-label Randomised Controlled Study to Investigate the Effectiveness of Pamidronate in the Prevention of …
qDEPR	4	RFC1	unknown	NA	Pralatrexate	approved, investigational	2009	Pralatrexate is an antineoplastic agent used for the treatment of relapsed or refractory peripheral T-cell lymphoma.	CHEMBL1201746	DB06813	Folotyn	Small Molecule	Intravenous	6	4	D016411; D009369; D016399; D008223; D006258	Lymphoma, T-Cell, Peripheral; Neoplasms; Lymphoma, T-Cell; Lymphoma; Head and Neck Neoplasms	DBCOND0088812 (Progression, Disease); DBCOND0079798 (Peripheral T-Cell Lymphoma (PTCL)); DBCOND0054830 (Refractory Peripheral T-Cell Lymphoma); DBCOND0136063 (Cutaneous T-Cell Lymphoma Recurrent); DBCOND0054830 (Refractory Peripheral T-Cell Lymphoma); DBCOND0054829 (Relapsed Peripheral T-Cell Lymphoma); DBCOND0079798 (Peripheral T-Cell Lymphoma (PTCL))	NCT03150602; NCT03349333; NCT01482962; NCT06072131	Unknown Status; Completed; Completed; Recruiting	Treatment; Treatment; Treatment; Treatment	A Pralatrexate Study in Asian Patients With Peripheral T-cell Lymphoma After Prior Therapy; A Single Arm Study Evaluating the Efficacy and Safety of Pralatrexate in Subjects With Relapsed or Refractory PTCL; Alisertib (MLN8237) or Investigator's Choice in Patients With Relapsed/Refractory Peripheral T-Cell Lymphoma; To Evaluate Efficacy of Belinostat or Pralatrexate in Combination Against CHOP Al…
qDEPR	4	UGDH	unknown	NA	NADH	approved, nutraceutical	NA	NADH is a nutrient used in some supplement products.	CHEMBL1234616	DB00157	EnBrace HR, EnLyte	Small Molecule	Oral; Intravenous	1	4	NA	NA	DBCOND0123277 (Menstrual Related Mood Disorder); DBCOND0065799 (Premenstrual Dysphoric Disorder (PMDD)); DBCOND0066800 (Premenstrual Syndrome (PMS)); DBCOND0022593 (Premenstrual tension with edema)	NCT04123483	Withdrawn	Treatment	EnBrace HR for PMS With Prominent Mood Symptoms or Menstrual Related Mood Disorders
qDEPR	4	UGDH	unknown	NA	Acetylsalicylic acid	approved, vet_approved	1950	Aspirin is a salicylate used to treat pain, fever, inflammation, migraines, and reducing the risk of major adverse cardiovascular events.	CHEMBL25	DB00945	Aggrenox, Alka-seltzer, Alka-seltzer Fruit Chews, Anacin, Arthriten Inflammatory Pain, Ascomp, Aspi-cor, Aspir-low, Bayer Aspirin, Bayer Womens, Bc Arthritis, Bc Original Formula, Bufferin, Duoplavin, Durlaza, Ecotrin, Ecpirin, Endodan Reformulated May 2009, Equagesic, Exaprin, Excedrin, Excedrin PM Triple Action, Fasprin, Fiorinal, Goody's Body Pain, Goody's Extra Strength, Goody's PM, Miniprin,…	Small Molecule	Ophthalmic; Oral; Respiratory (inhalation); Topical	522	4	D009120; D013035; D006261; D001168; D013927	Muscle Cramp; Spasm; Headache; Arthritis; Thrombosis	DBCOND0000503 (Atrial Fibrillation); DBCOND0020609 (Stroke); DBCOND0020966 (Cancer); DBCOND0027886 (Diabetes Mellitus); DBCOND0032938 (Acute Coronary Syndrome (ACS)); DBCOND0027936 (Arterial Occlusive Diseases); DBCOND0027897 (Myocardial Ischemia); DBCOND0134620 (Syndrome Heart Disease); DBCOND0020194 (Arteriosclerosis); DBCOND0057913 (Cardiovascular Disease (CVD)); DBCOND0032937 (Coronary Artery…	NCT02168829; NCT01968798; NCT00135226; NCT04609111; NCT04624854	Active Not Recruiting; Active Not Recruiting; Active Not Recruiting; Active Not Recruiting; Active Not Recruiting; Treatment	Prevention; Prevention; Prevention; Treatment	Optimal Anticoagulation for Higher Risk Patients Post-Catheter Ablation for Atrial Fibrillation Trial; ASPREE Cancer Endpoints Study; ASCEND: A Study of Cardiovascular Events iN Diabetes; ShorT and OPtimal Duration of Dual AntiPlatelet Therapy-3 Study; Dual Anti-Platelet Therapy in Patients With Coronary Multi-Vessel Disease (DAPT-MVD)
qDEPR	4	UBE2K	unknown	NA	Histamine	approved, investigational	1939	Histamine is an ingredient of topical drugs for the relief of joint pain or muscle aches and pains.	CHEMBL90	DB05381	Activon Arthritis, Ceplene, Rematex	Small Molecule	Subcutaneous; Intradermal; Percutaneous;	6	4	D015470; D009369; D011625; D007249; D008228	Leukemia, Myeloid, Acute; Neoplasms; Pterygium; Inflammation; Lymphoma, Non-Hodgkin	DBCOND0029883 (Acute Myeloid Leukemia); DBCOND0080730 (Normal Skin); DBCOND0116545 (Skin Photoaging); DBCOND0035632 (Leukemias); DBCOND0032623 (Osteoarthritis of the Knee); DBCOND0020306 (Melanoma); DBCOND0028461 (Metastatic Cancer)	NCT01347996; NCT02889159; NCT00003991; NCT01112722; NCT00039234	Completed; Recruiting; Completed; Completed; Unknown Status	Treatment; Basic Science; Treatment; Treatment; Treatment	Maintenance Therapy With Ceplene (Histamine) and IL-2 on Immune Response and MRD in Acute Myeloid Leukemia; Immunologic Profile of Chronically Photodamaged Skin; Interleukin-2 Plus Histamine Dihydrochloride in Treating Patients With Acute Myeloid Leukemia; Apitox, Honeybee Toxin for Pain and Inflammation of Osteoarthritis; Interleukin-2 With or Without Histamine Dihydrochloride in Treating Patien…
qDEPR	4	UBE2K	unknown	NA	Dextroamphetamine	approved, illicit	1955	Dextroamphetamine is a sympathomimetic agent used in the treatment of attention deficit hyperactivity disorder (ADHD) and narcolepsy.	CHEMBL612	DB01576	Adderall, Dexedrine, Mydayis, Procentra, Xelstrym, Zenzedi	Small Molecule	Oral; Transdermal	17	4	D001161; D001289; D009290; D019966; D005910 D005910	Arteriosclerosis; Attention Deficit Disorder with Hyperactivity; Narcolepsy; Substance-Related Disorders; Glioma	DBCOND0109996 (Expectancy Versus Pharmacotherapy Effect of Adderall); DBCOND0049114 (Alzheimer's Disease (AD)); DBCOND0017457 (Dementia); DBCOND0041782 (Attention Deficit Hyperactivity Disorder (ADHD)); DBCOND0049114 (Alzheimer's Disease (AD)); DBCOND0017457 (Dementia)	NCT03530631; NCT00254033; NCT01220440; NCT00468143	Completed; Completed; Completed; Completed	Health Services Research; Treatment; Treatment; Treatment	Neuroimaging the Expectancy Versus Pharmacotherapy Effect of Adderall on Cognitive Performance; Apathy Associated With Alzheimer's Disease; Comparing the Efficacy of Methylphenidate, Dextroamphetamine and Placebo in Children Diagnosed With ADHD; A Within-Subject Cross-Over Comparison Between Immediate Release and Extended Release Adderall;
dDEPR	12	SLCO1A2	unknown	inhibitor	Rifamycin	approved, investigational	2018	Rifamycin is an antibacterial used to treat traveler's diarrhea.	CHEMBL437765	DB11753	Aemcolo	Small Molecule		4	4	D015817; D003967; D014376; D043183	Eye Infections; Diarrhea; Tuberculosis; Irritable Bowel Syndrome	DBCOND0053771 (Impacted Third Molar Tooth); DBCOND0132334 (Pulmonology); DBCOND0040361 (Traveler's Diarrhea); DBCOND0035016 (Human Immunodeficiency Virus (HIV) Infections); DBCOND0129755 (Coronavirus Disease 2019 (COVID‑19)); DBCOND0035963 (Tuberculosis (TB))	NCT04349579; NCT05588492; NCT01142089; NCT01208922; NCT05575518	Active Not Recruiting; Recruiting; Completed; Recruiting	Prevention; Treatment; Treatment; Treatment	Evaluation of the Effects of Irrigation of the Extraction Socket With Rifamycine; The Safety, Completion Rate and Prevention Effect by Rifamycin-containing Regimens for Latent Tuberculosis Infection in Patients With Kidney Transplantation: a Prospective Intervention Pilot Study; Study to Evaluate Safety and Efficacy of Rifamycin SV Multi-Matrix System (MMX) for the Treatment of Traveler's Diarrhe…
dDEPR	12	SLCO1A2	unknown	inhibitor	Rifampin	approved	1971	Rifampin is an antibiotic used alone or in combination with other antimicrobial drugs to treat tuberculosis and asymptomatic carriers of Neisseria meningitidis.	CHEMBL374478	DB01045	Isonarif, Rifadin, Rifamate, Rifater, Rofact	Small Molecule	Oral; Intravenous	79	4	D014376; D014397; D016918; D007239; D000544 D007239 D007239	Tuberculosis; Tuberculosis, Pulmonary; Arthritis, Reactive; Infections; Alzheimer Disease	DBCOND0032817 (Staphylococcus Aureus); DBCOND0059476 (Blood Pressure Regulation); DBCOND0020891 (Contraception); DBCOND0035963 (Tuberculosis (TB)); DBCOND0035016 (Human Immunodeficiency Virus (HIV) Infections); DBCOND0027886 (Diabetes Mellitus)	NCT00304811; NCT01690104; NCT04463680; NCT00402454; NCT02123628	Completed; Completed; Completed; Completed; Completed	Not Available; Basic Science; Basic Science; Prevention; Treatment	Vancomycin vs. Vancomycin Plus Gentamycin in Treatment of MRSA Infection; The Effect of PXR Activation on Blood Pressure Regulation; Rifampin and the Contraceptive Implant; Evaluation of Three Regimens of Chemoprophylaxis for Tuberculosis in Patients co-Infected by HIV and Mycobacterium Tuberculosis; Antibiotic Treatment Duration for Non-Surgically-Treated Diabetic Foot Osteomyelitis
dDEPR	12	SLCO1A2	unknown	NA	Nadolol	approved	1979	Nadolol is a non-selective beta-adrenergic antagonist used for the management of arrhythmias, angina pectoris, and hypertension.	CHEMBL521606	DB01203	Corgard	Small Molecule	Oral	8	4	D009203; D000787; D020521; D002318; D006973	Myocardial Infarction; Angina Pectoris; Stroke; Cardiovascular Diseases; Hypertension	DBCOND0000510 (Heart Failure, Diastolic); DBCOND0040020 (Cardiac Failure); DBCOND0057913 (Cardiovascular Disease (CVD)); DBCOND0027920 (Heart Failure); DBCOND0067171 (Heart Failure With Preserved Ejection Fraction (HFpEF)); DBCOND0056665 (Cirrhosis of the Liver); DBCOND0029015 (Portal Hypertension); DBCOND0031498 (Gastrointestinal Hemorrhage); DBCOND0056665 (Cirrhosis of the Liver); DBCOND0039178…	NCT04757584; NCT00450164; NCT00921349; NCT01103154; NCT00910689	Completed; Completed; Completed; Completed; Completed	Other; Prevention; Prevention; Prevention; Treatment	Pilot Deprescribing N-of-1 Trials for Beta-blockers in HFpEF; Secondary Prophylaxis After Variceal Bleeding in Non-Responders; A Trial of Ligation Plus Nadolol Versus Nadolol Alone in the Prophylaxis of First Variceal Bleeding in Cirrhosis; A Trial of Nadolol Plus Isosorbide Mononitrate Versus Carvedilol for the Prevention of Variceal Rebleeding; Drug and Non-Drug Treatment Of Severe Migraine
dDEPR	12	RECQL	unknown	NA	Ampicillin	approved, vet approved	1965	Ampicillin is a penicillin derivative used for the treatment of a variety of infections caused by gram-positive and gram-negative bacteria as well as some anaerobes.	CHEMBL174	DB00415	Unasyn	Small Molecule	Intramuscular; Intravenous; Oral	38	4	D007239; D004696; D059413; D001424; D008581	Infections; Endocarditis; Intraabdominal Infections; Intraabdominal Infections; Meningitis	DBCOND0028036 (Breast Cancer); DBCOND0024122 (Urinary Tract Infection); DBCOND0032121 (Kidney Stones); DBCOND0047720 (Surgical Site Infections); DBCOND0020327 (bacterial skin infections); DBCOND0058927 (Complicated Appendicitis)	NCT00356148; NCT02384200; NCT01138852; NCT00368537; NCT01678365	Completed; Completed; Completed; Completed; Completed	Prevention; Prevention; Prevention; Treatment; Treatment	The Efficacy of Prophylactic Antibiotic Administration During Breast Cancer Surgery in Overweight Patients.; A Randomized Trial of Preoperative Prophylactic Antibiotics Prior to Kidney Stone Surgery (Percutaneous Nephrolithotomy [PCNL]); Ampicillin/Sulbactam Versus Cefuroxime as Antimicrobial Prophylaxis for Cesarean Section; Study Comparing the Safety and Efficacy of Tigecycline With Ampicillin-…
dDEPR	13	UGGT2	unknown	NA	Hydrochlorothiazide	approved, vet approved	1959	Hydrochlorothiazide is a thiazide diuretic used to treat edema associated with a number of conditions, and hypertension.	CHEMBL435	DB00999	Accuretic, Actelsar Hct, Aldactazide, Altace HCT, Atacand, Atacand Hct, Avalide, Benicar Hct, Diovan Hct, Exforge Hct, Hyzaar, Ifirmacombi, Karvezide, Lopressor Hct, Lotensin Hct, Micardis-hct, Olmetec Plus, Tekturna Hct, Teveten HCT, Tribenzor, Urozide, Vaseretic, Viskazide, Zestoretic, Ziac	Small Molecule	Oral	102	4	D009203; D000787; D006973; D006333; D014115	Myocardial Infarction; Angina Pectoris; Hypertension; Heart Failure; Toxemia	DBCOND0117851 (Hypertension, Essential Hypertension); DBCOND0029752 (Type 2 Diabetes Mellitus); DBCOND0020037 (Hypertension); DBCOND0027900 (Myocardial Infarction); DBCOND0027886 (Diabetes Mellitus); DBCOND0027898 (Angina Pectoris); DBCOND0020609 (Stroke); DBCOND0000503 (Atrial Fibrillation); DBCOND0028920 (Diabetic Nephropathy)	NCT00457483; NCT02046395; NCT00263393; NCT00438113; NCT00535925	Completed; Completed; Completed; Completed; Completed	Diagnostic; Diagnostic; Prevention; Prevention; Prevention	Nijmegen Antihypertensive Management Improvement Study; Effect of Renin-angiotensin-system Blockade on Urinary Free Light Chains in Patients With Type 2 Diabetes Mellitus; Rural Andhra Pradesh Cardiovascular Prevention Study (RAPCAPS); Atrial Substrate Modification With Aggressive Blood Pressure Lowering to Prevent AF; Nephropathy In Type 2 Diabetes and Cardio-renal Events
Notes: Used ChEMBL, DrugBank and ClinicalTrials.gov databases to highlight top approved drugs for target genes that have been evaluated in clinical trials.

[truncated: 5 more sheets: Table S11, Table S12, Table S13, Table S14, Table S15]
