# Supplementary material for: A Large-Scale Genome-wide Association Study of Blood Pressure Accounting for Gene-Depressive Symptomatology Interactions in 564,680 Individuals from Diverse Populations
Source: Research Square preprint supplement (doi:10.21203/rs.3.rs-6025759/v1), 2025-02-17
Supplement: Supplementary file 2 [file c6cc32c54a44b443a2b72f24.docx]

**Supplemental Figure 1**. Comparison of SNP x DEPR effects at novel and known loci identified in dDEPR analyses between dDEPR and qDEPR models

| **dDEPR** | **qDEPR** |
| --- | --- |
| 1q31.3 (rs1664073690) | |
| 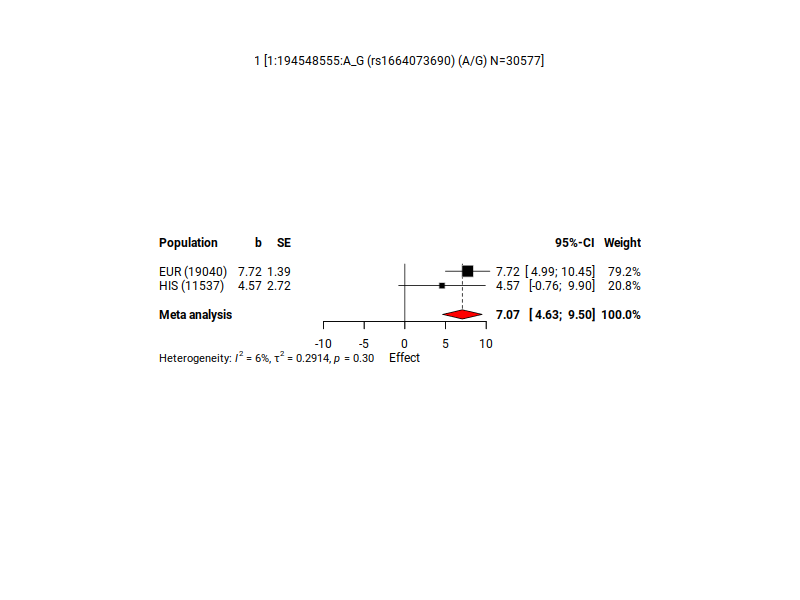 | 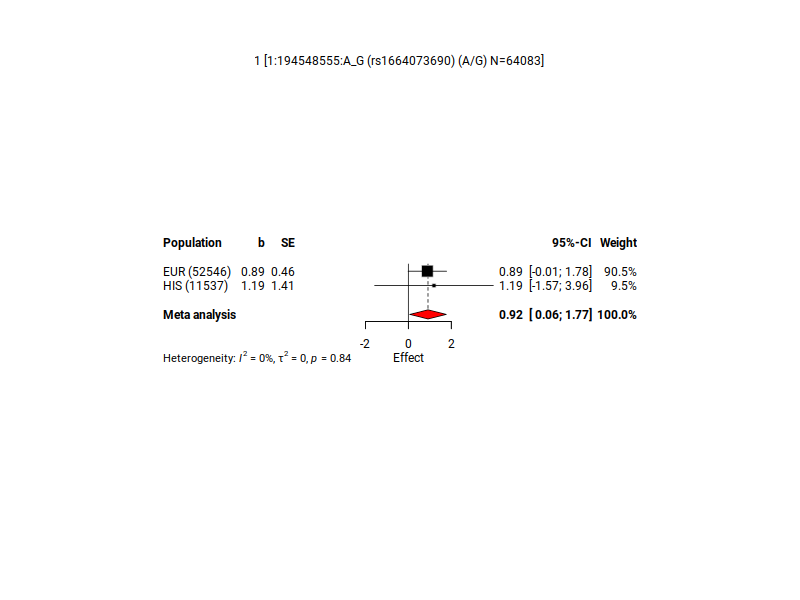 |
| 2q13.3 (rs10178576) | |
| 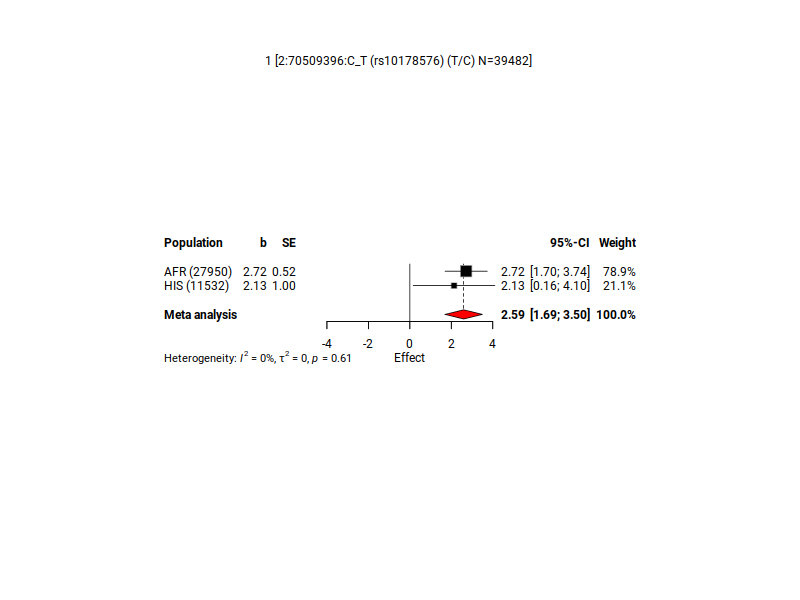 | 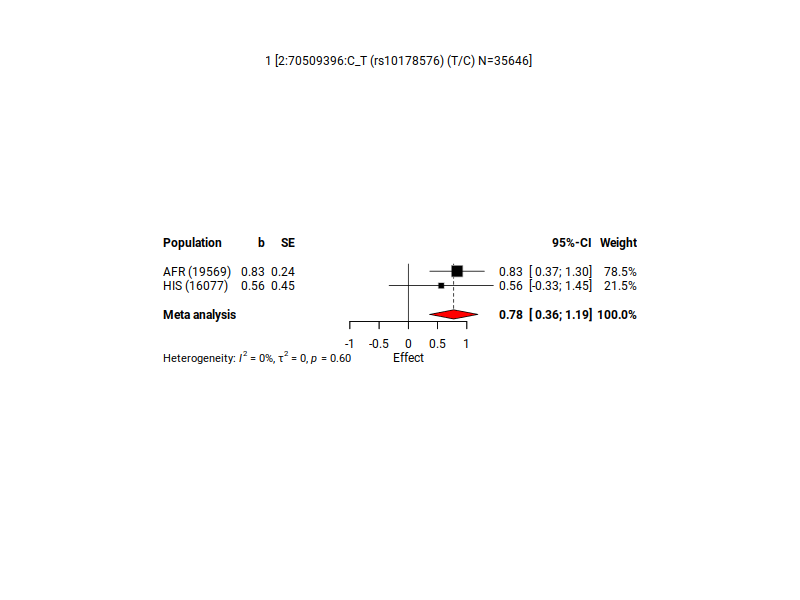 |
| 3p22.1 (rs115760284) | |
| 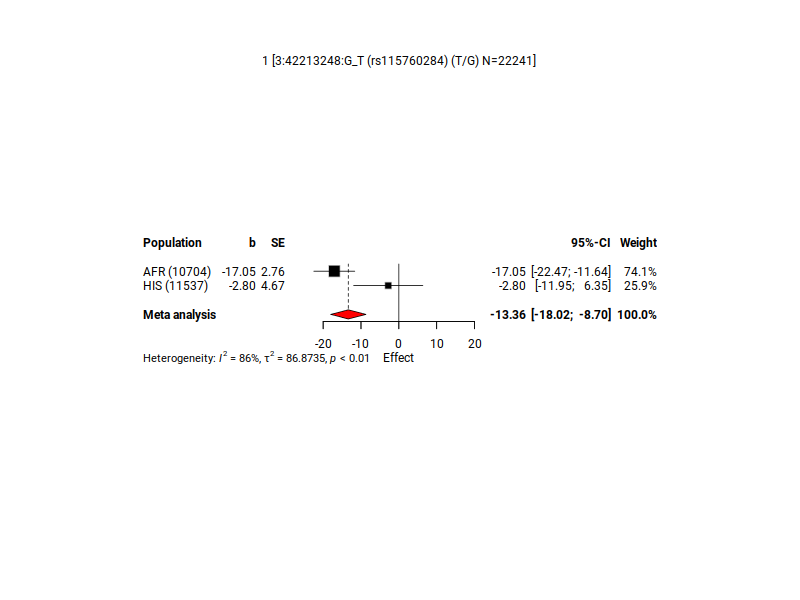 | 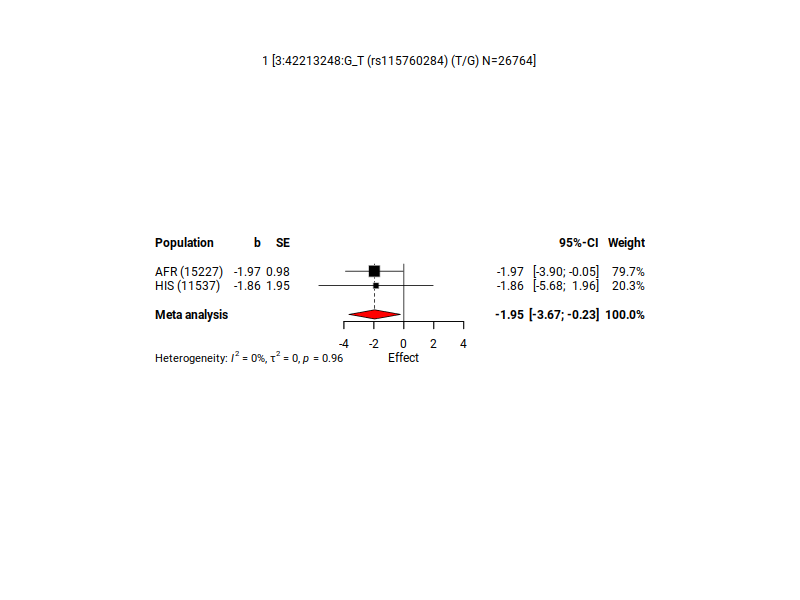 |
| 4q35.1 (rs113521945) | |
| 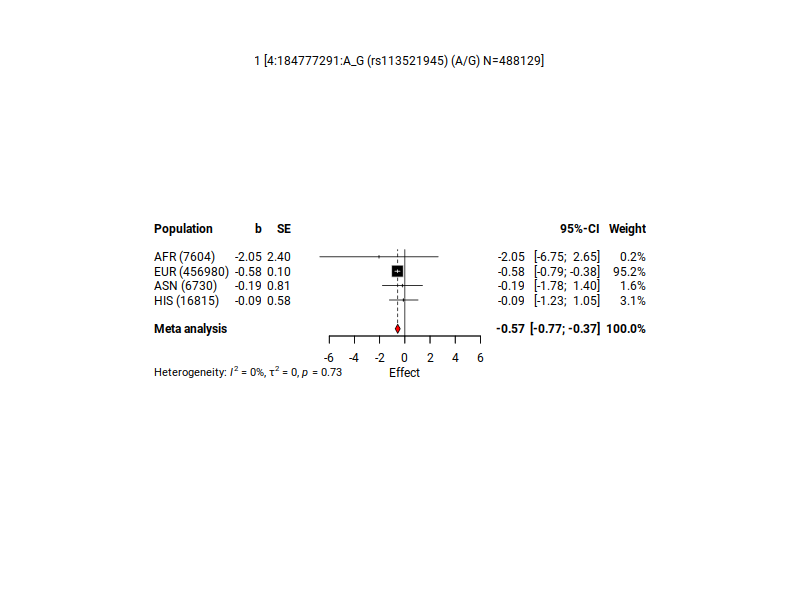 | 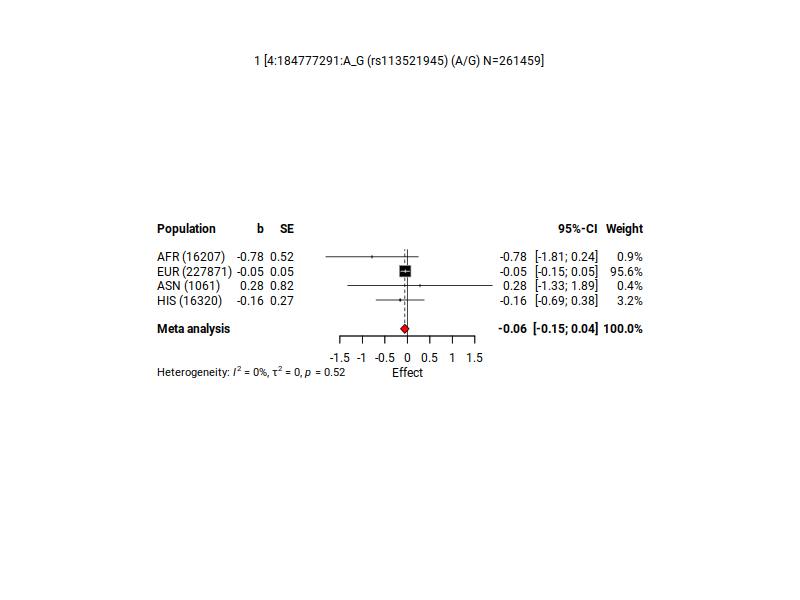 |
| 7q21.11 (rs147967138) | |
| 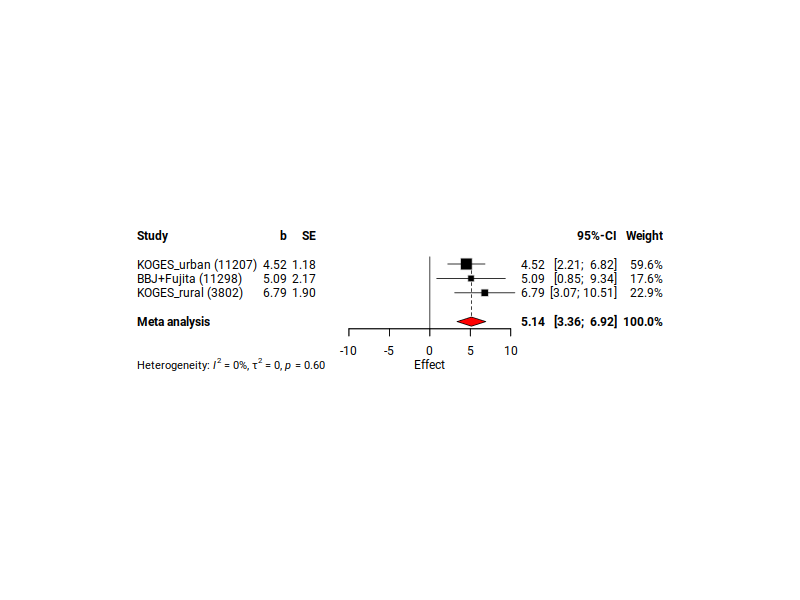 | 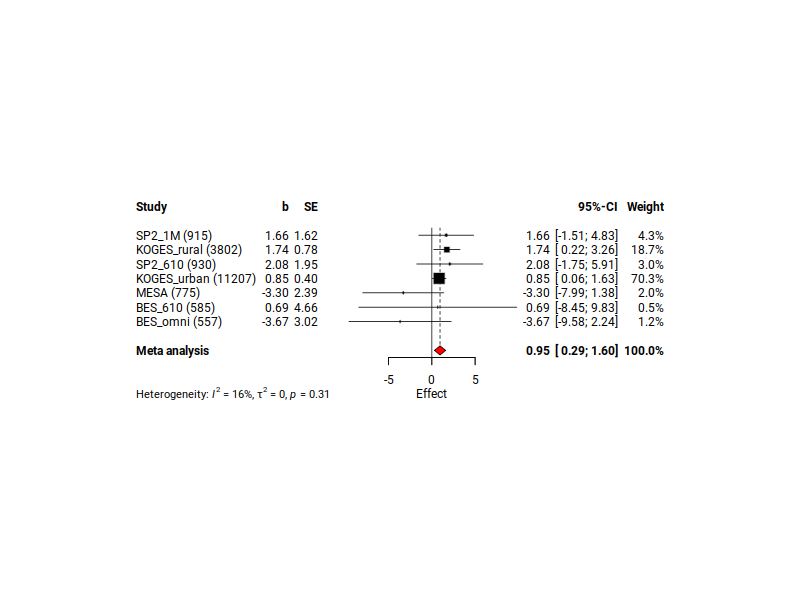 |
| 7q31.1 (rs757194) | |
| 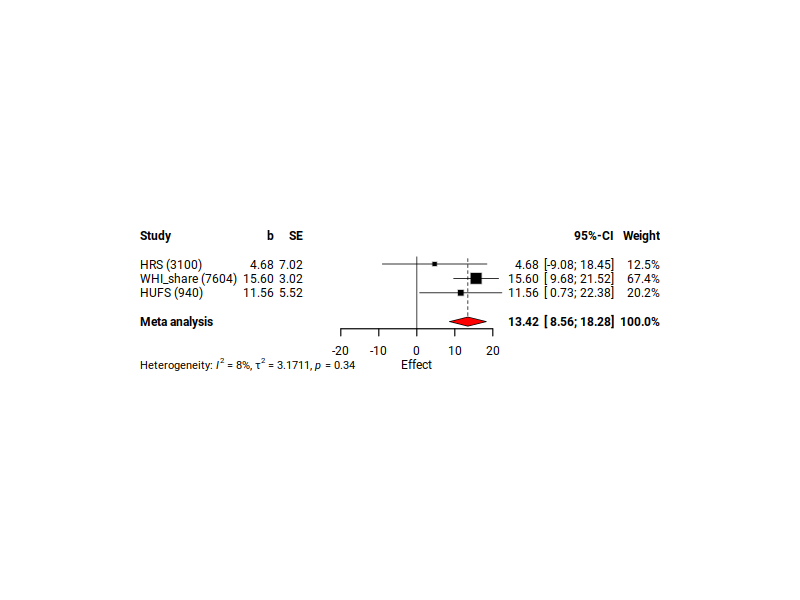 | 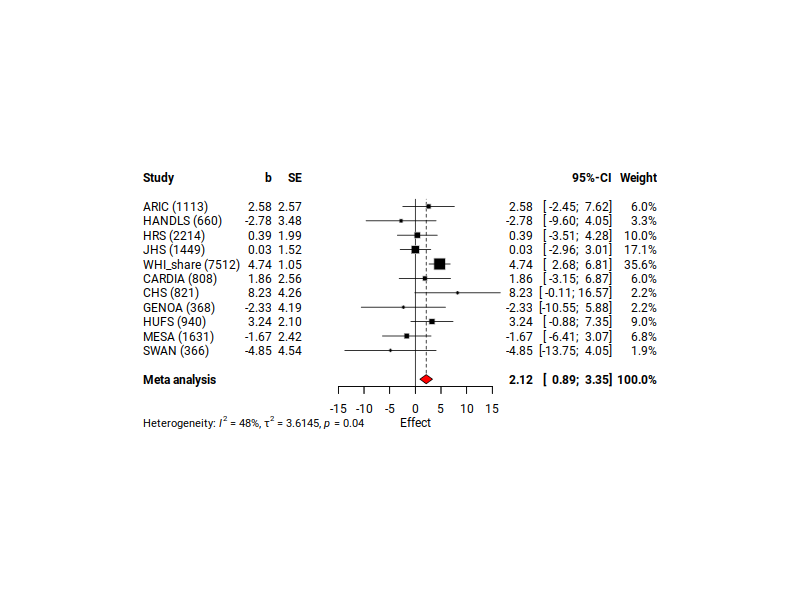 |
| 12p12.1 (rs7979305) | |
| 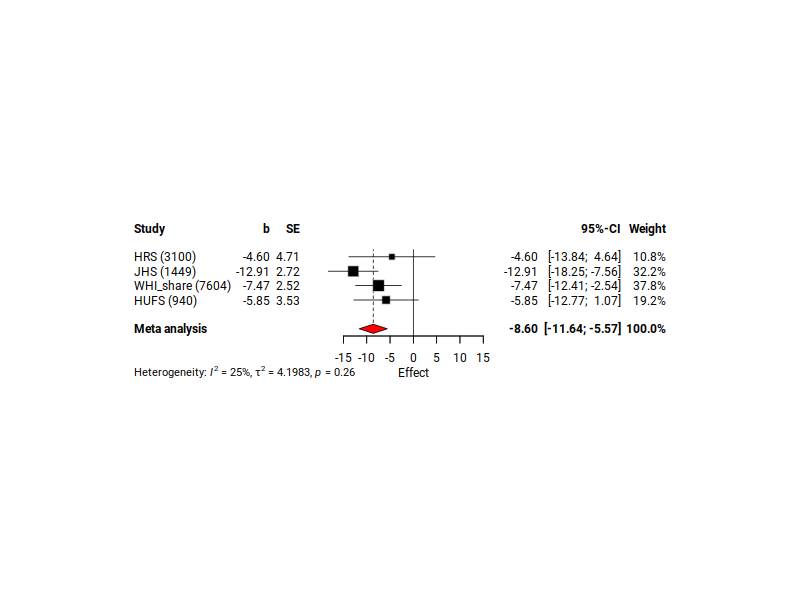 | 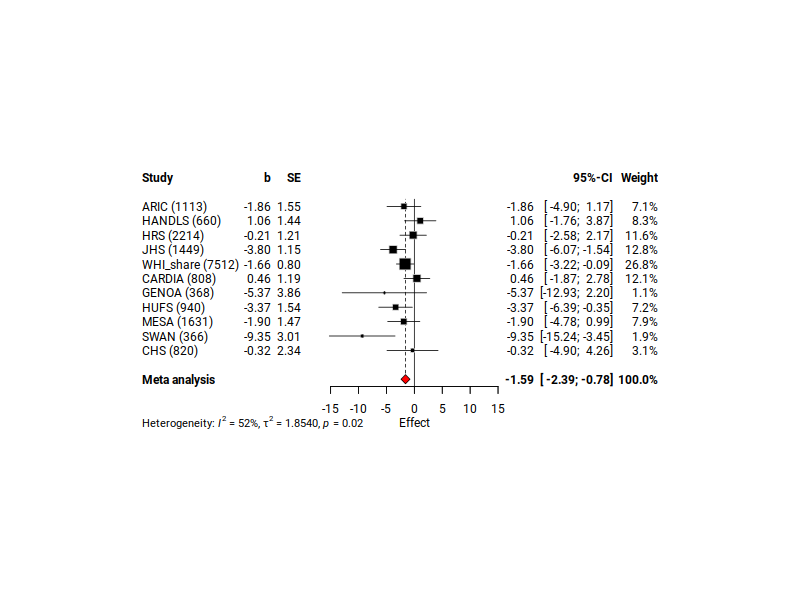 |
| 13q32.1 (rs75095906) | |
| 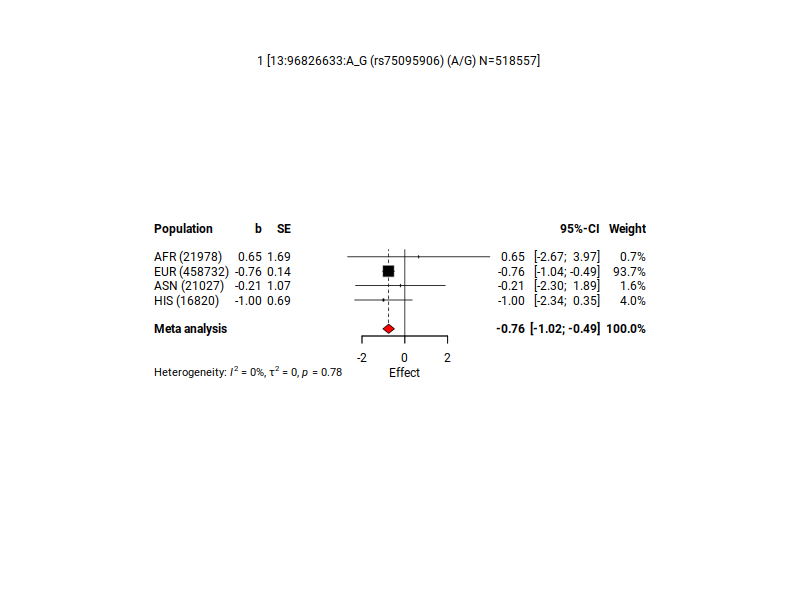 | 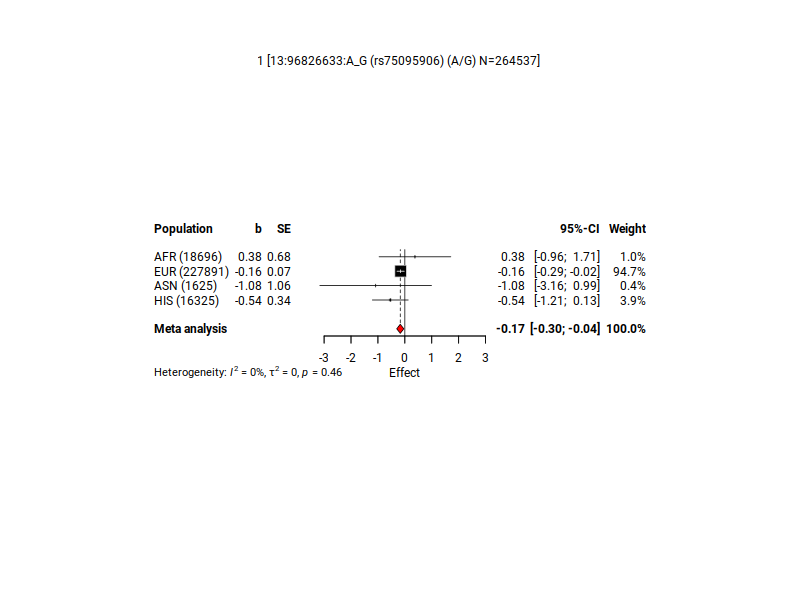 |
| 16q23.2 (rs9931605) | |
| 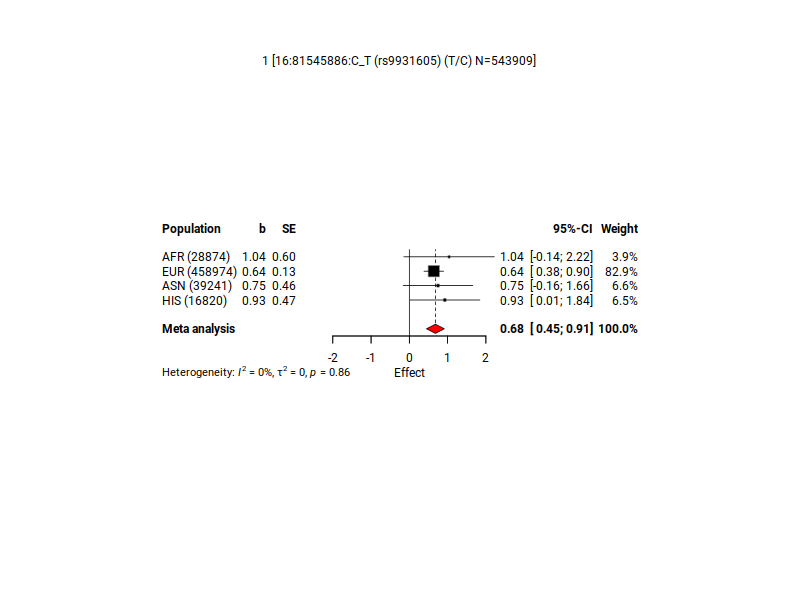 | 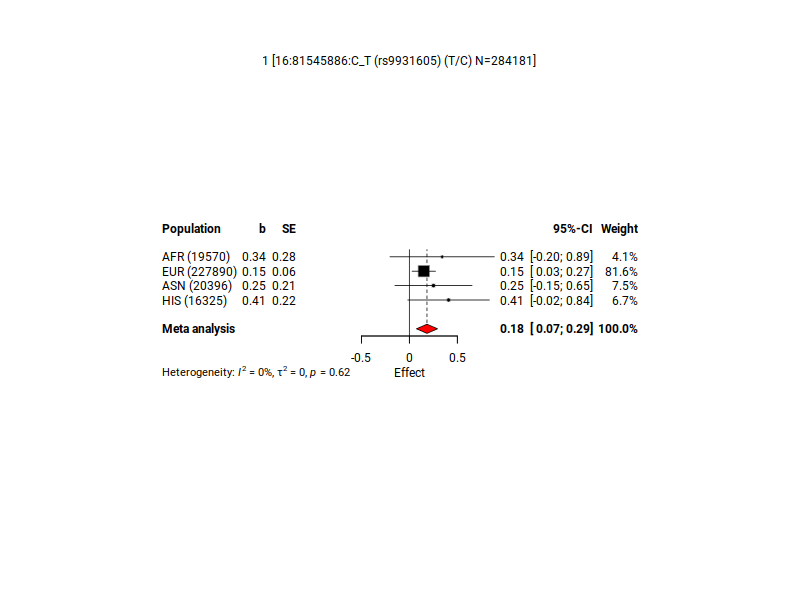 |

**Supplemental Figure 2**. Comparison of SNP x DEPR effects at novel and known loci identified in qDEPR analyses between dDEPR and qDEPR models

| **dDEPR** | **qDEPR** |
| --- | --- |
| 2q14.2 (rs77572777) | |
| 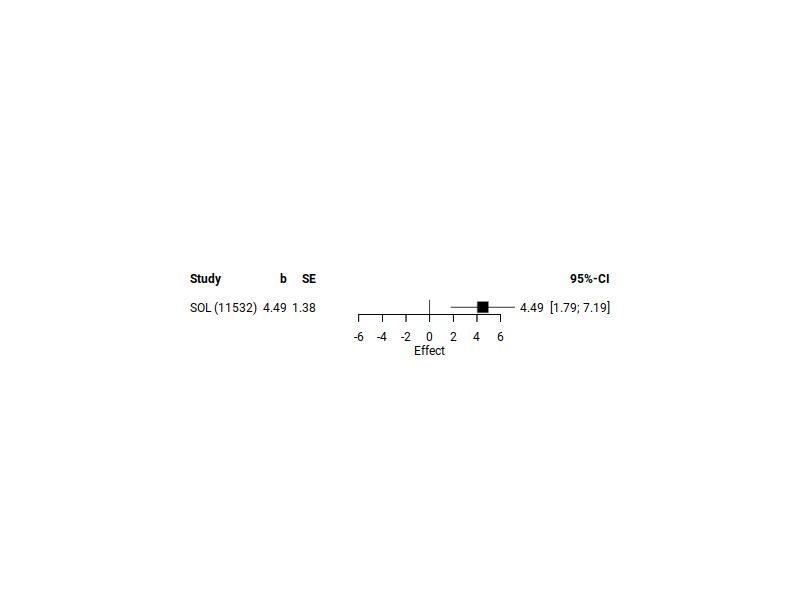 | 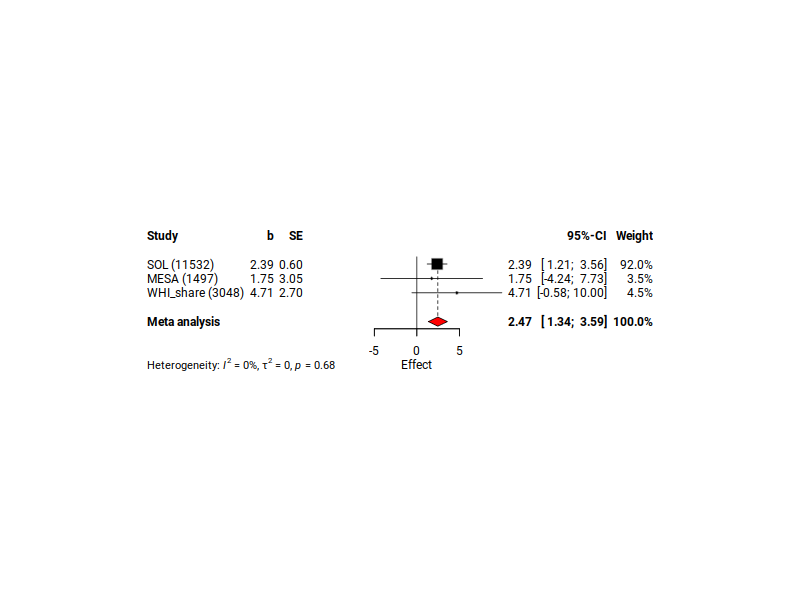 |
| 3p26.3 (rs148780833) | |
| Not available | 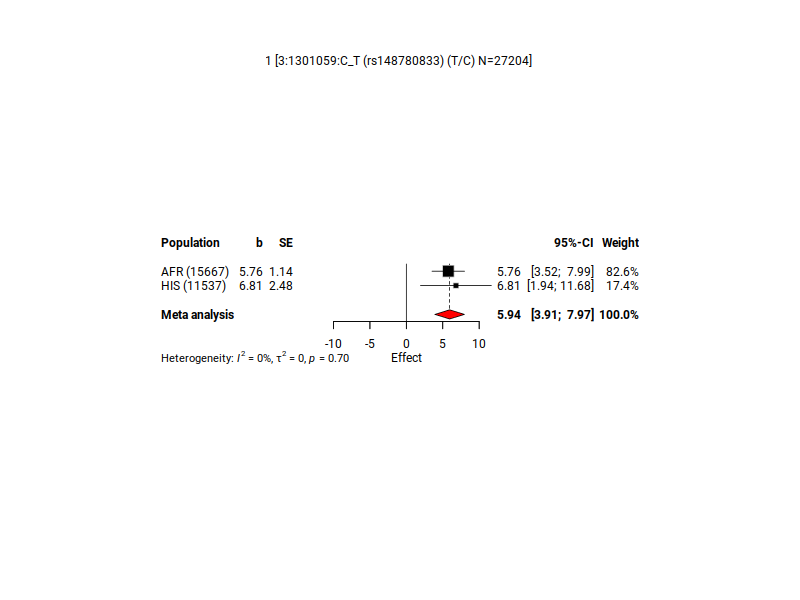 |
| 3p25.3 (rs59284269) | |
| 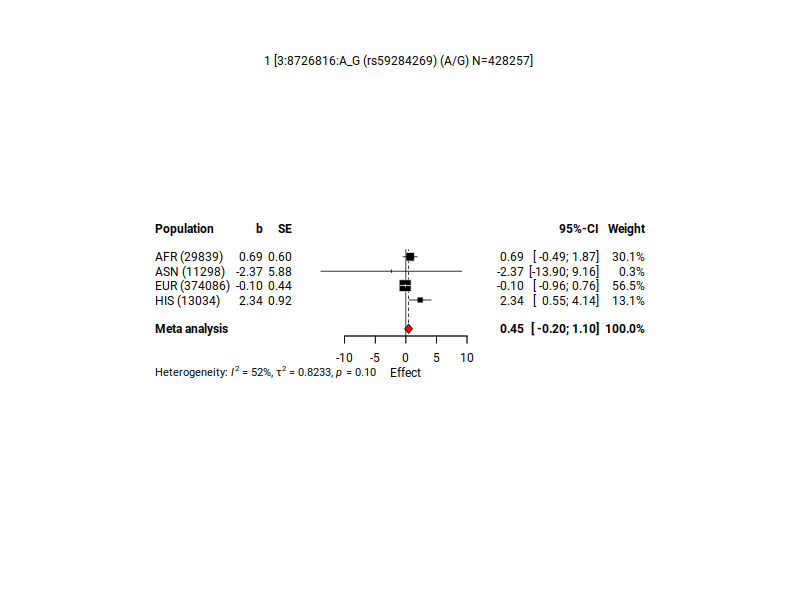 | 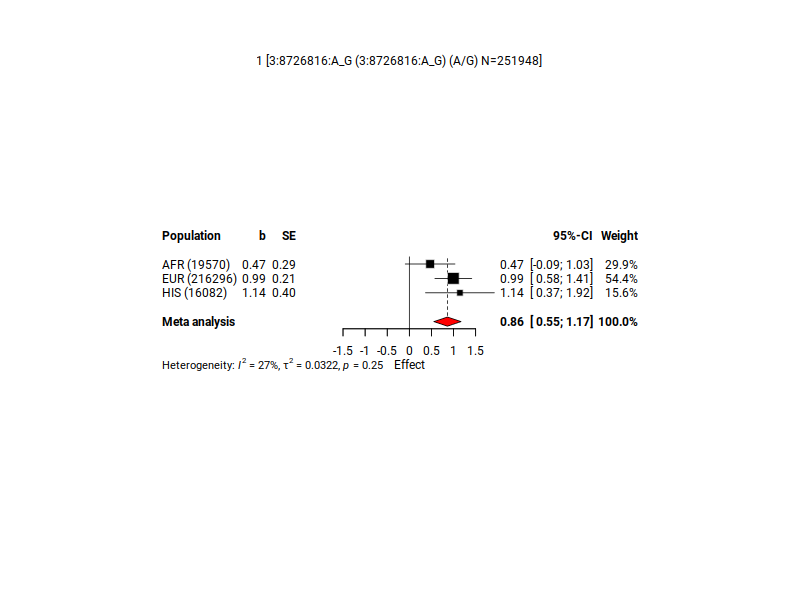 |
| 3q13.11 (rs748650739) | |
| 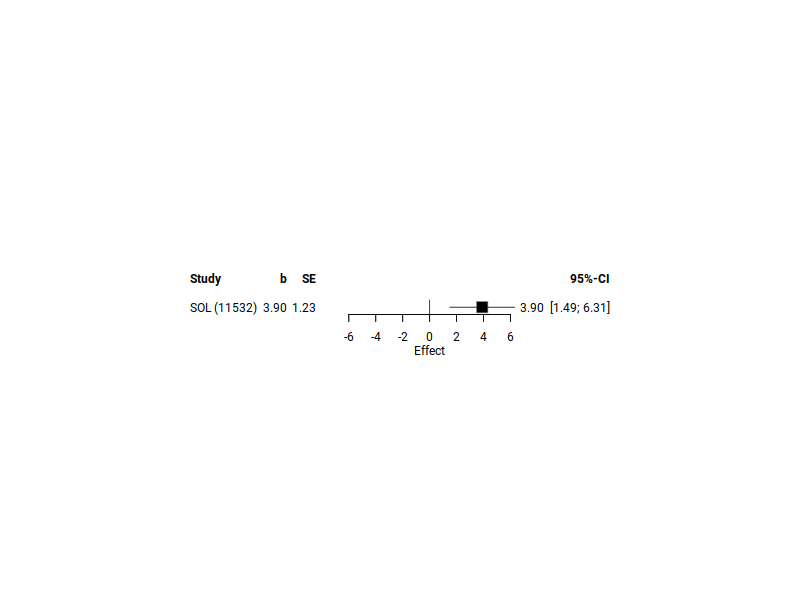 | 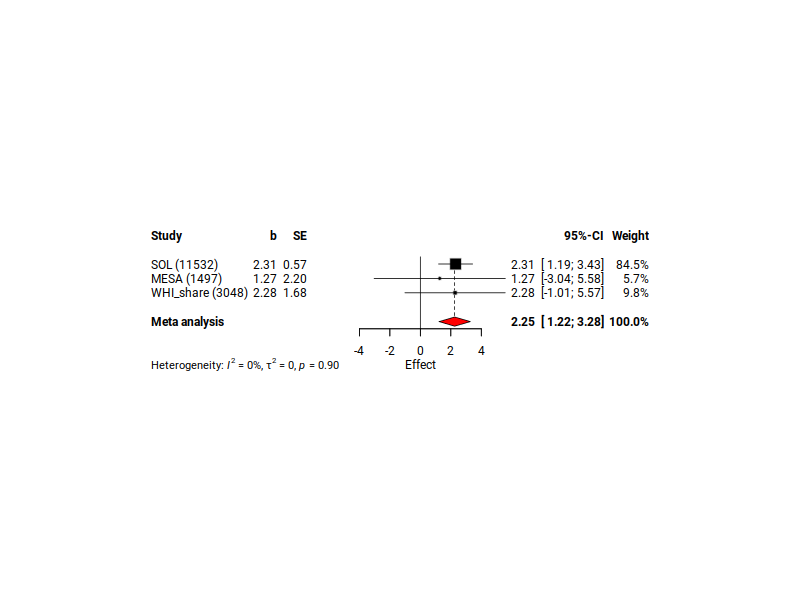 |
| 4p14 (rs145132348) | |
| 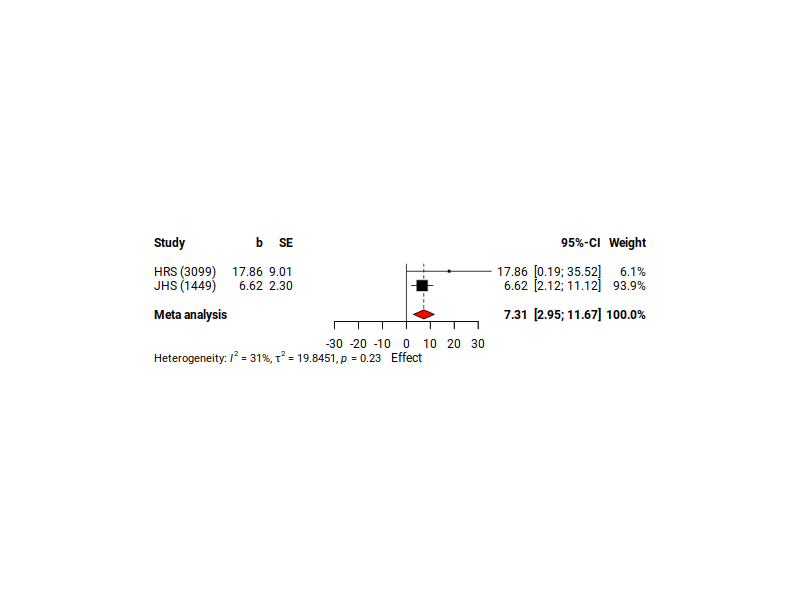 | 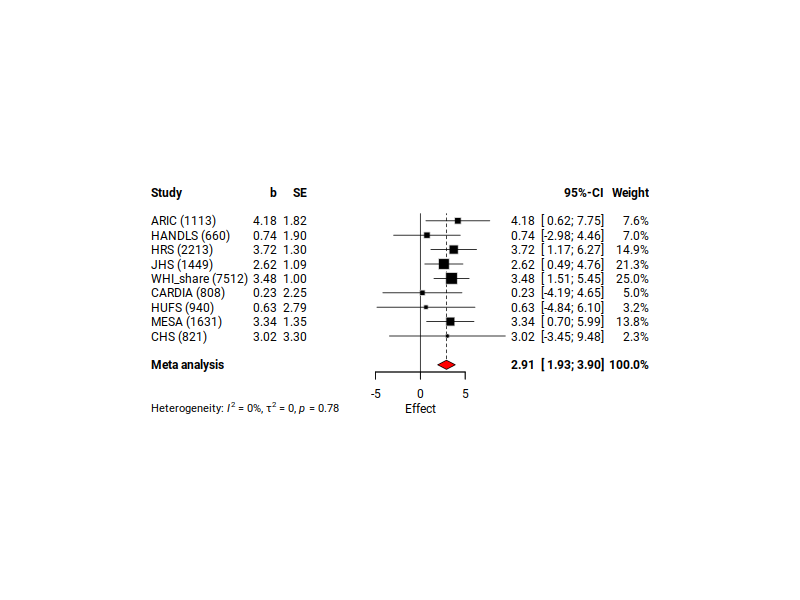 |
| 12q13.13 (rs114544309) | |
| 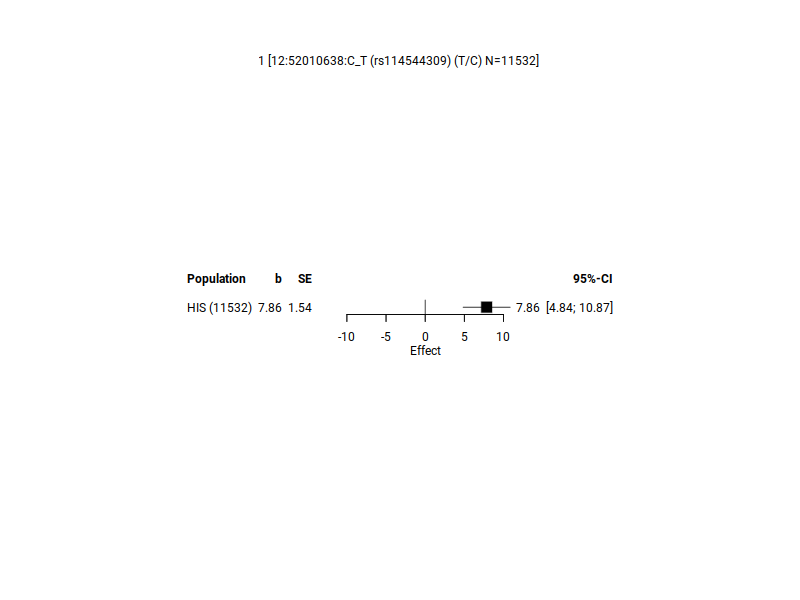 | 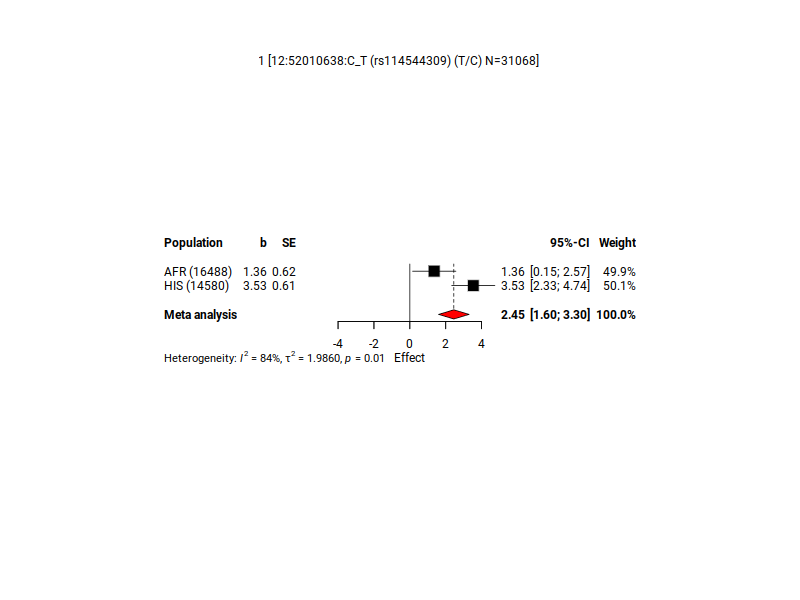 |
| 17p13.3 (rs140618249) | |
| 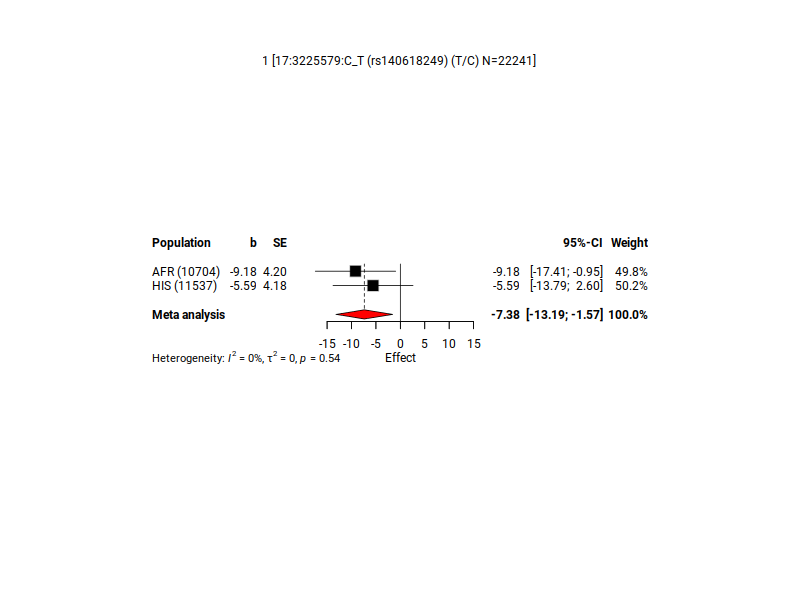 | 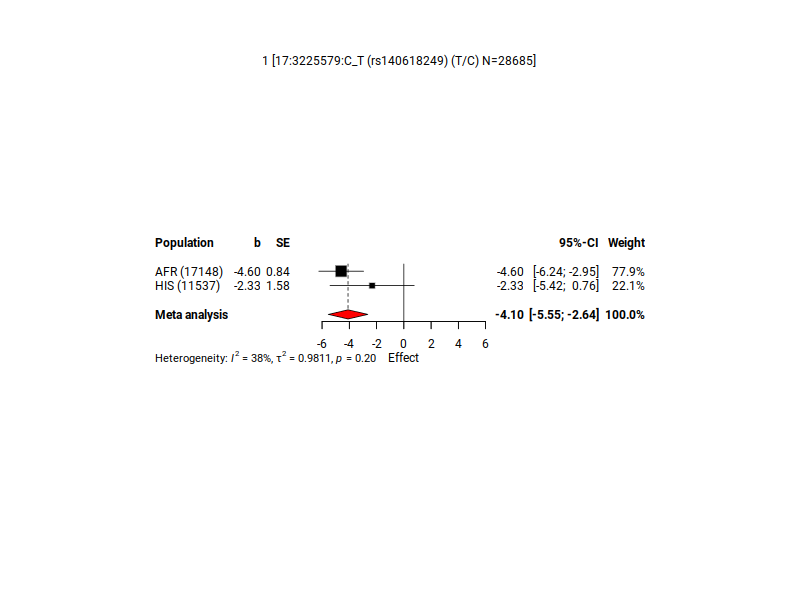 |

**Supplemental Figure 3.** Number of SNPs in dDEPR (D) and qDEPR (Q) analyses across three BP traits in population-specific and cross-population meta-analyses (CPMA)

**
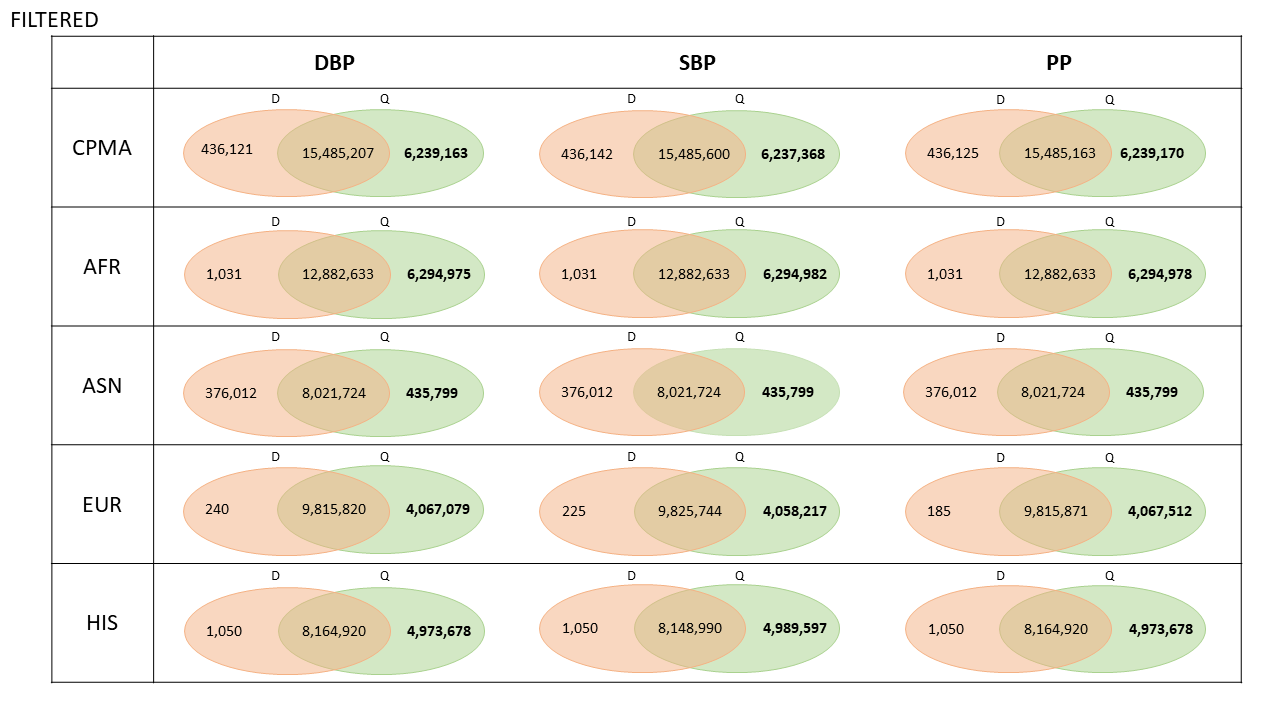
Supplemental Figure 4**. Enrichment of the prioritized genes mapped to novel and known BP loci in differentially expressed genes (DEG) sets from GTEx v8 54 tissue types


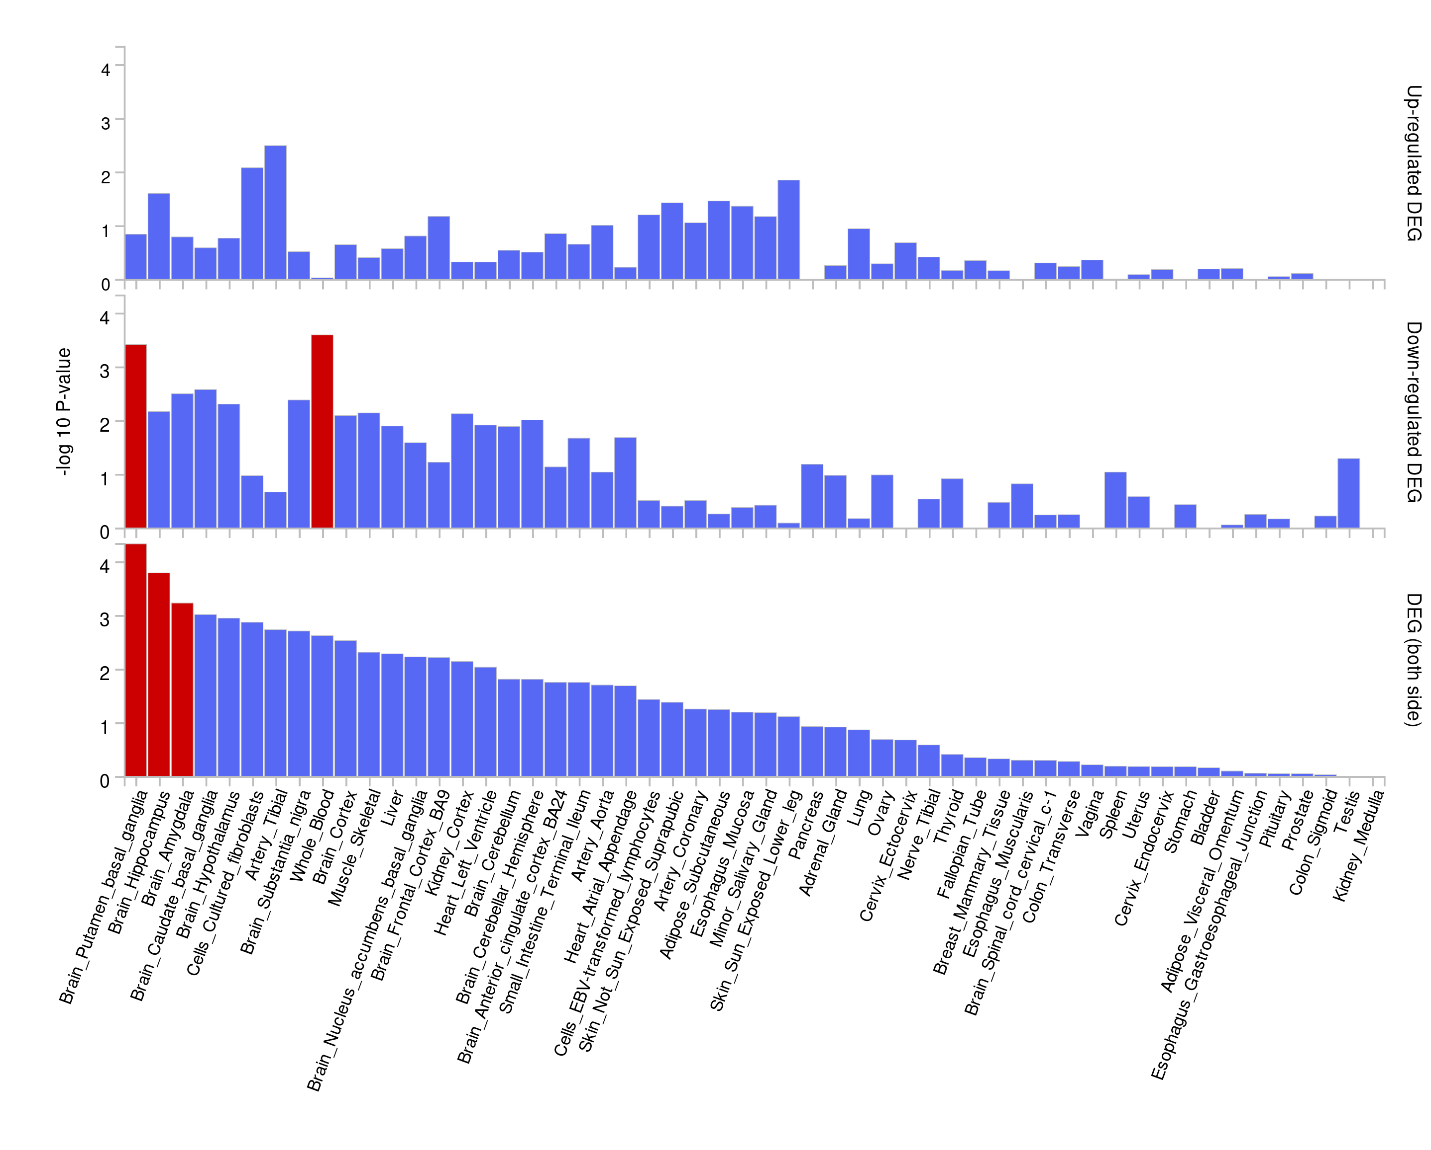


**Supplemental Figure 5.** Manhattan and QQ plots for the 2df joint and 1df interaction P-values in cross-population dDEPR analyses. (Green: known, Blue: novel)

| **2df joint P-value** | | |
| --- | --- | --- |
| DBP | 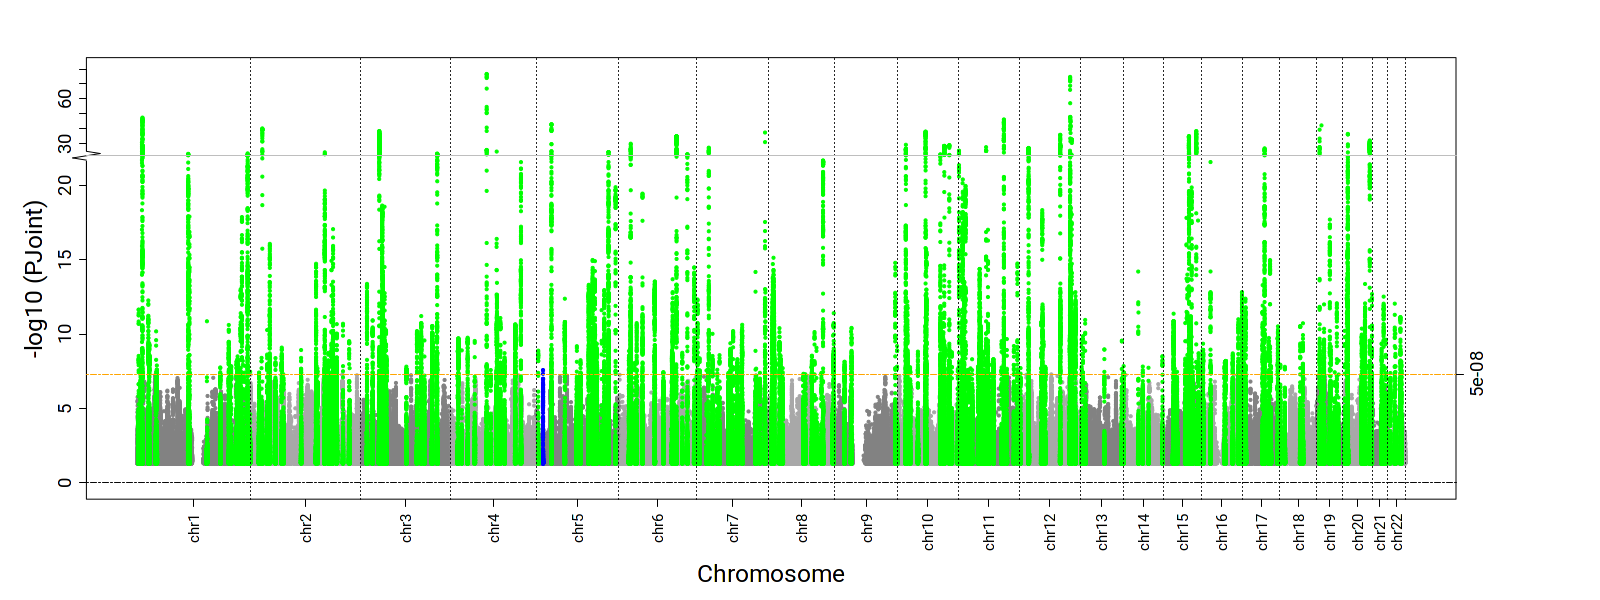 | λ = 1.12  Ffdfdsfdsλsffdsfdfkl;jjkfldsfds 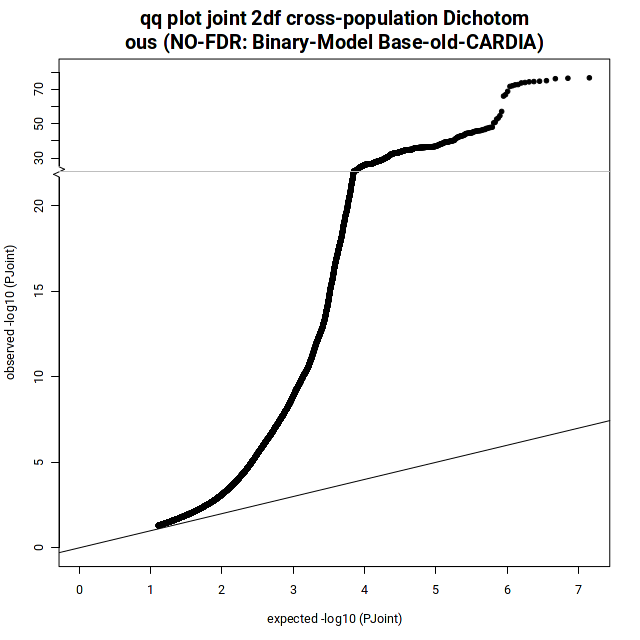 |
| SBP | 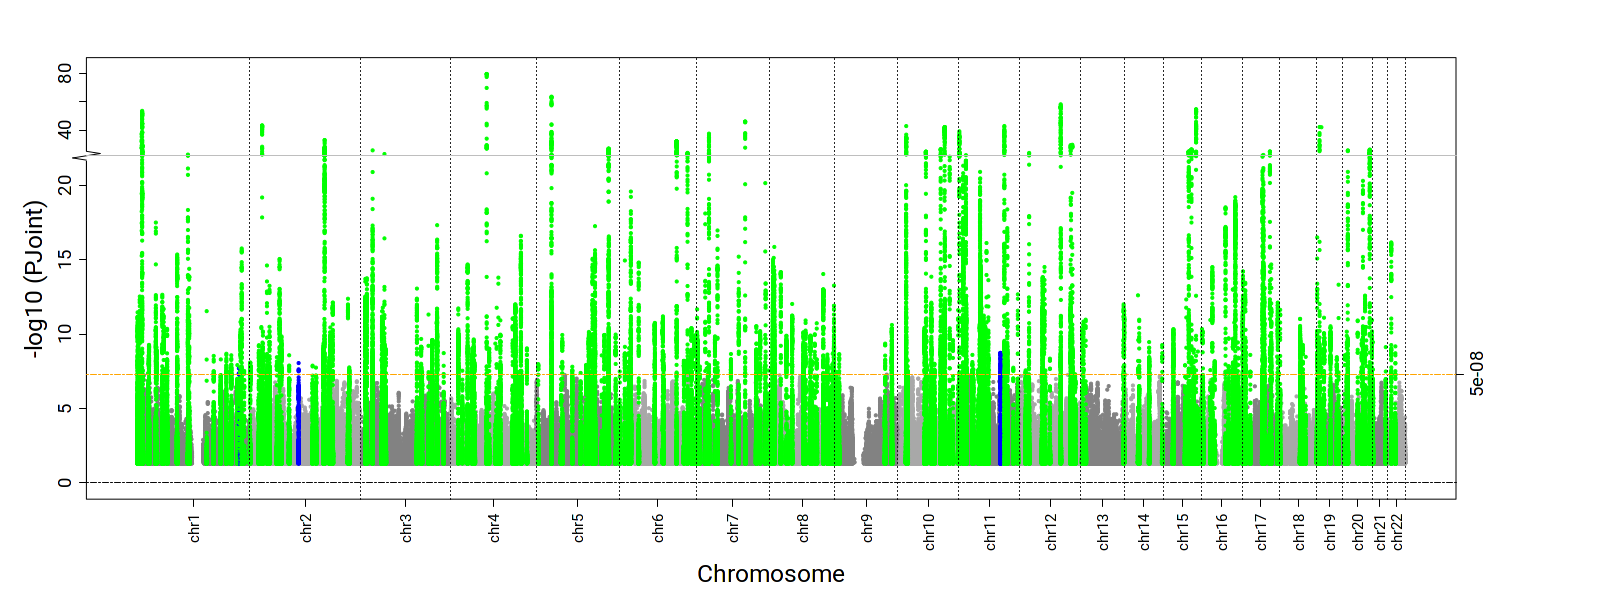 | λ = 1.13 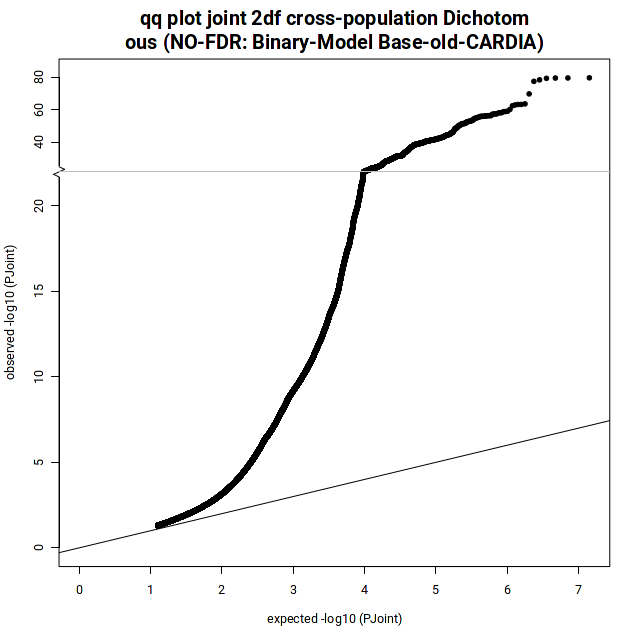 |
| PP | 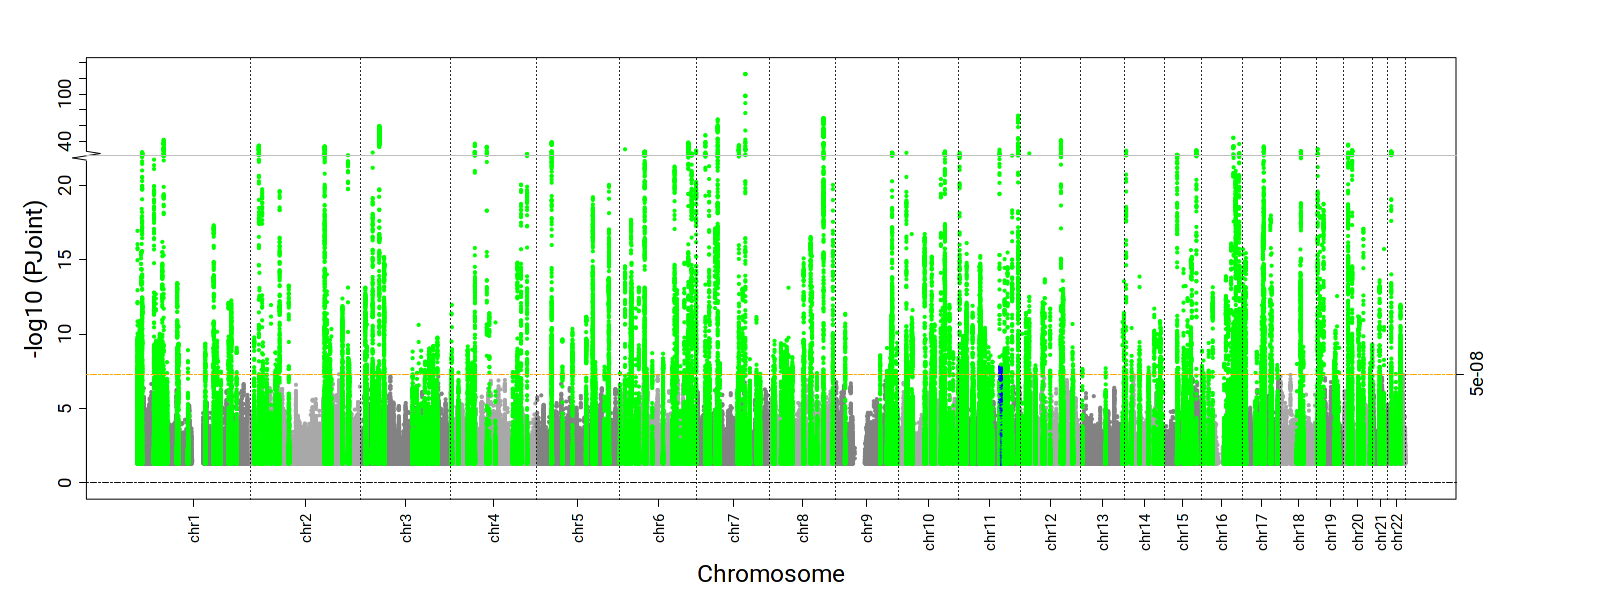 | λ = 1.12 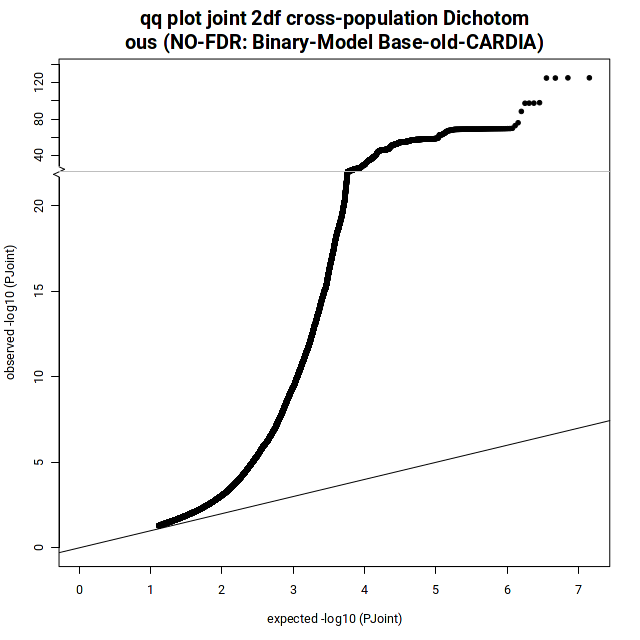 |
| **1df Interaction P-value** | | |
| DBP | 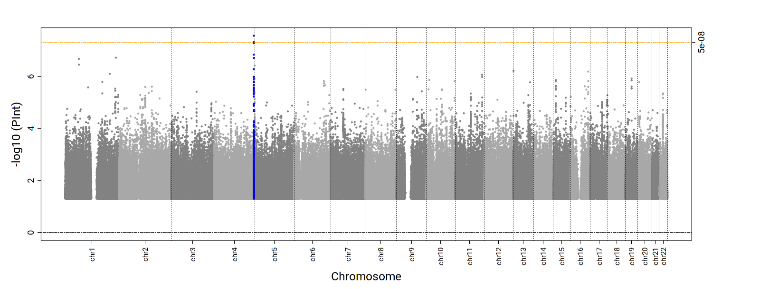 | 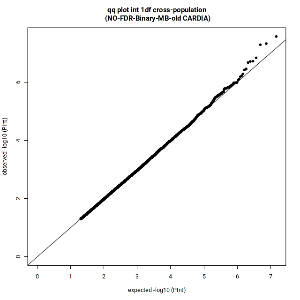  λ = 0.99 |
| SBP | 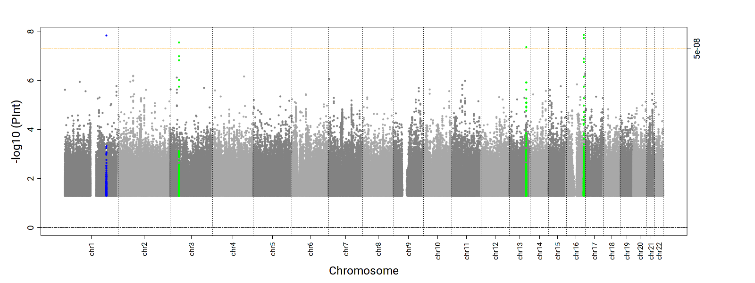 | 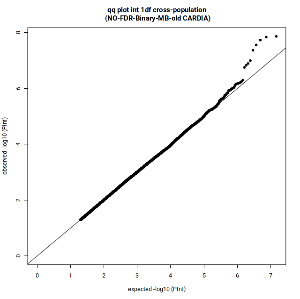  λ = 1.00 |
| PP | 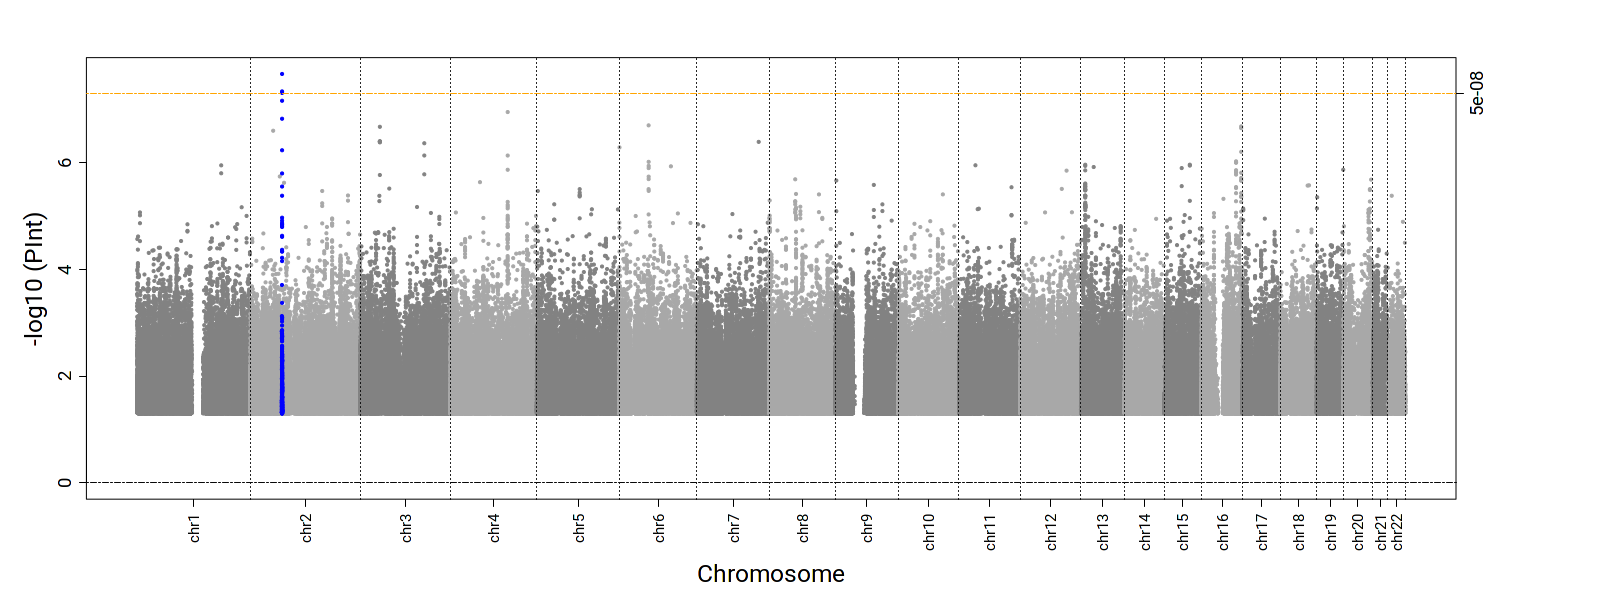 | λ = 1.01 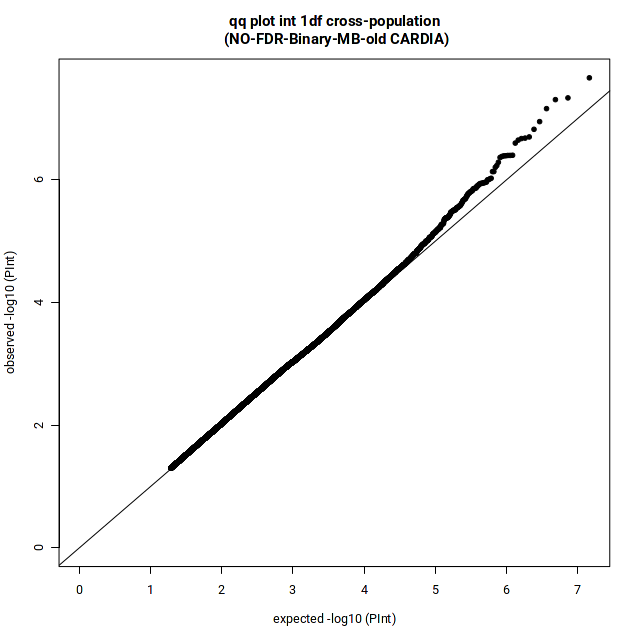 |

**Supplemental Figure 6.** Manhattan and QQ plots for the 2df joint and 1df interaction P-values in EUR-specific dDEPR analyses. (Green: known, Blue: novel)

| **2df joint P-value** | | |
| --- | --- | --- |
| DBP | 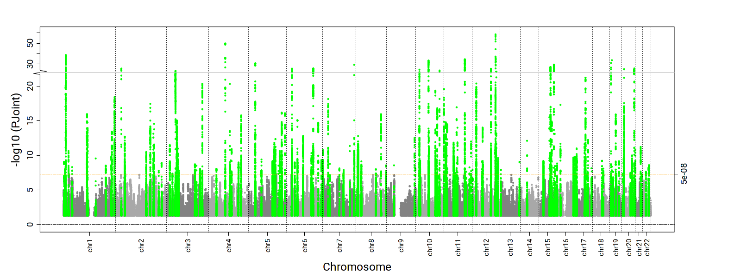 | 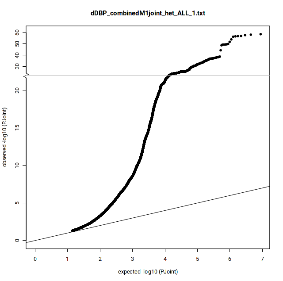  λ = 1.28  Ffdfdsfdsλsffdsfdfkl;jjkfldsfds |
| SBP | 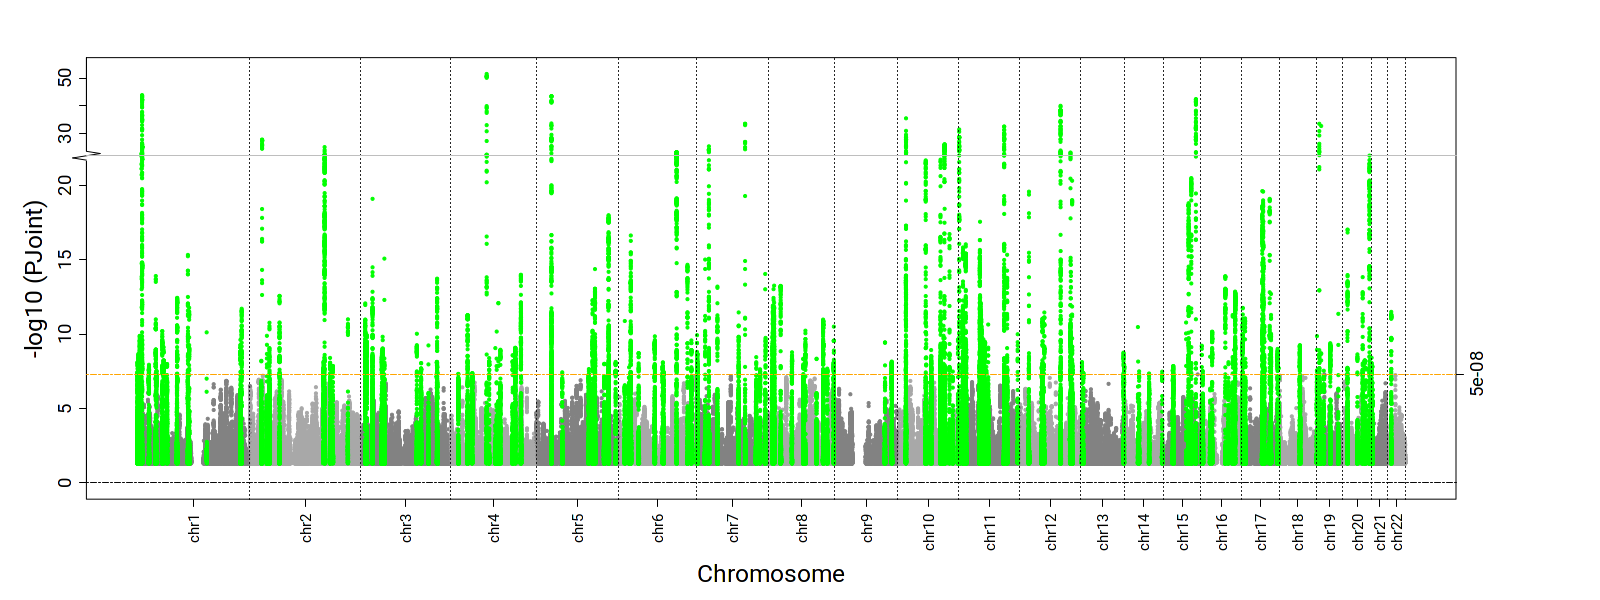 | λ = 1.28 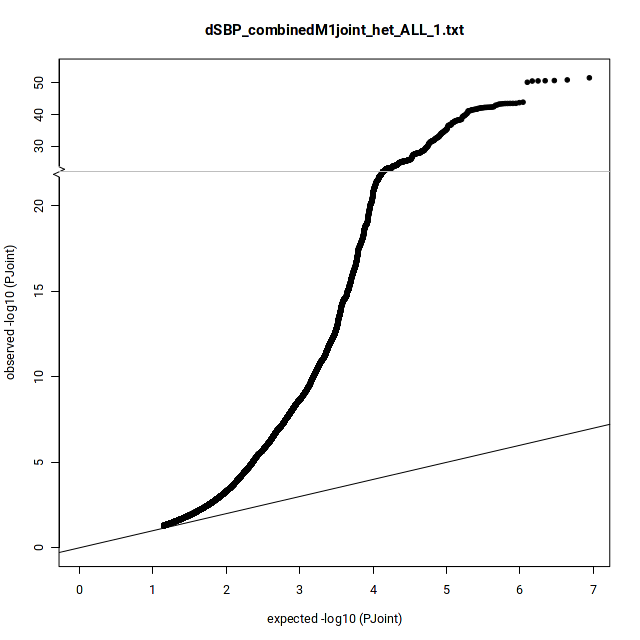 |
| PP | 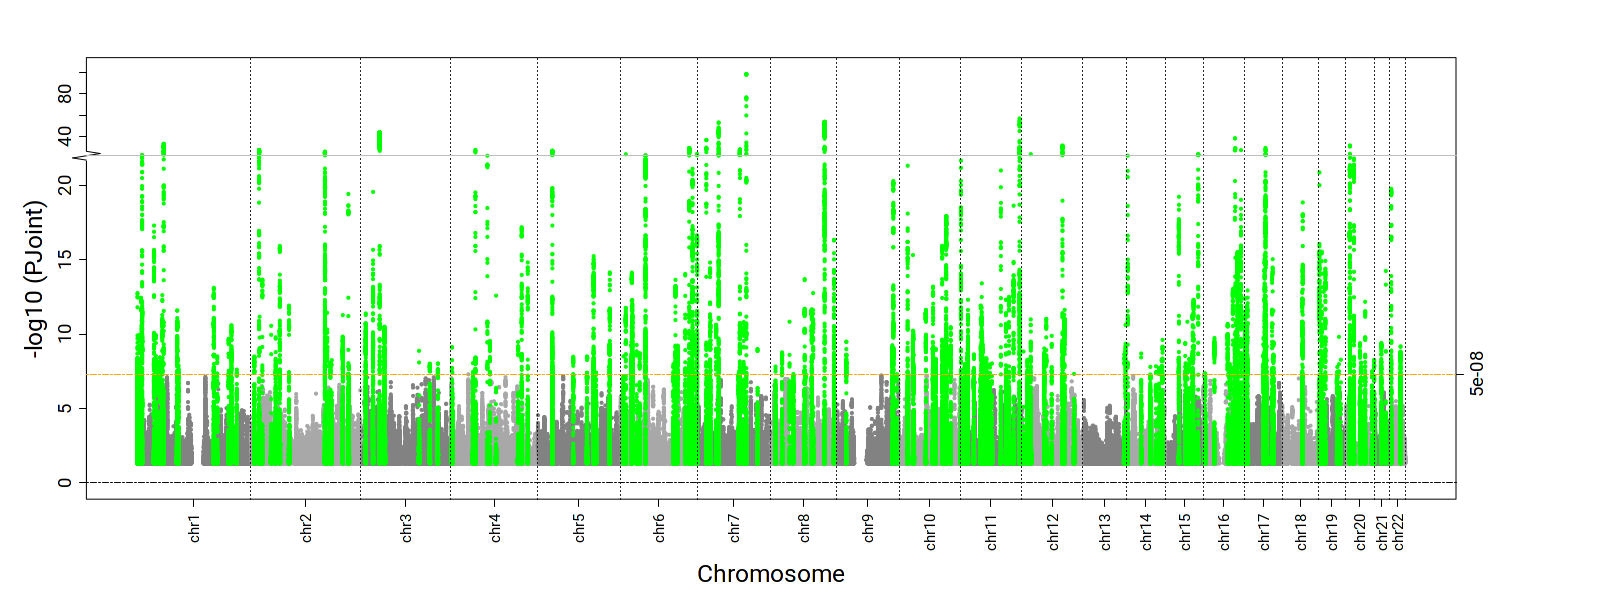 | λ = 1.27 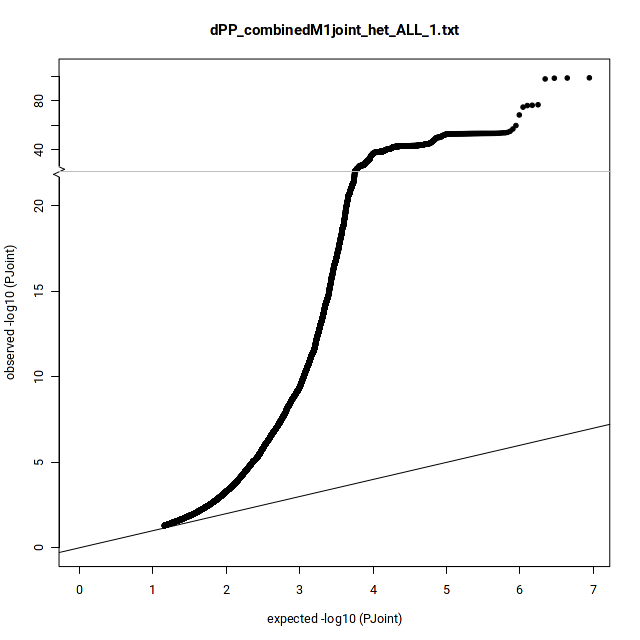 |
| **1df Interaction P-value** | | |
| DBP | 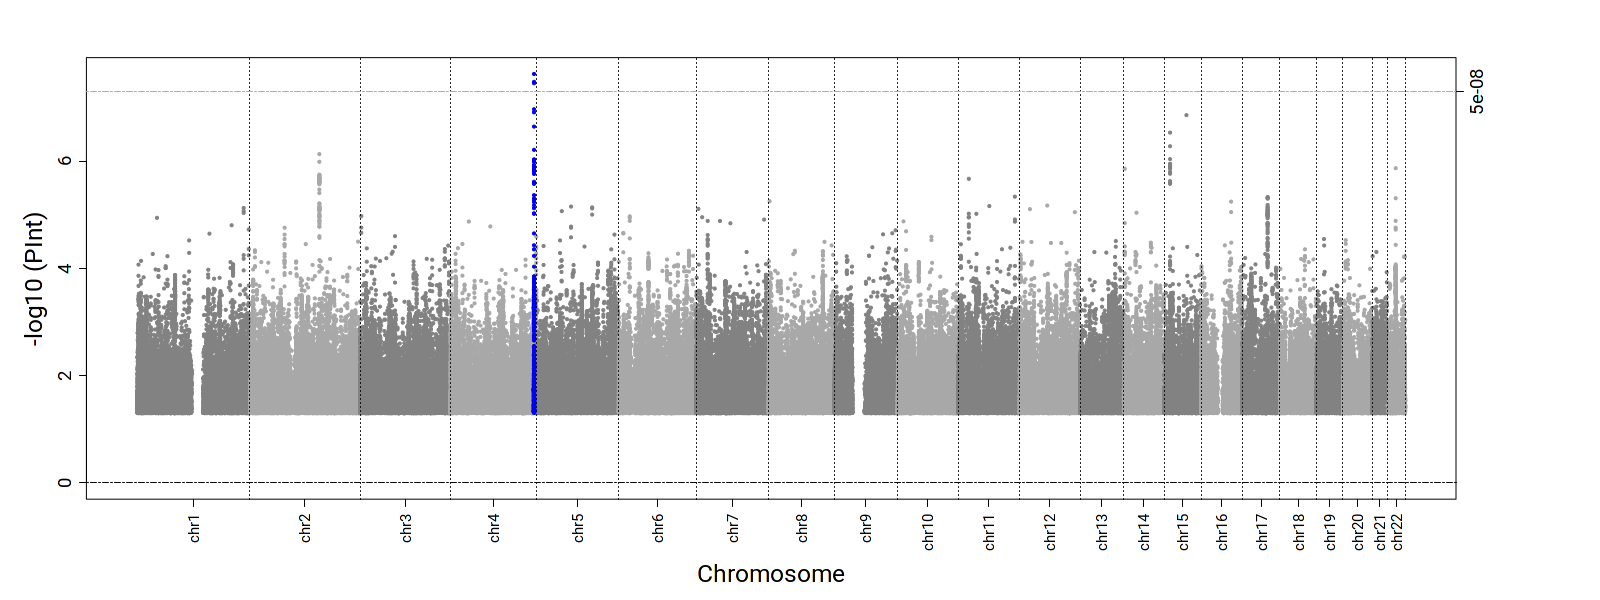 | λ = 1.00 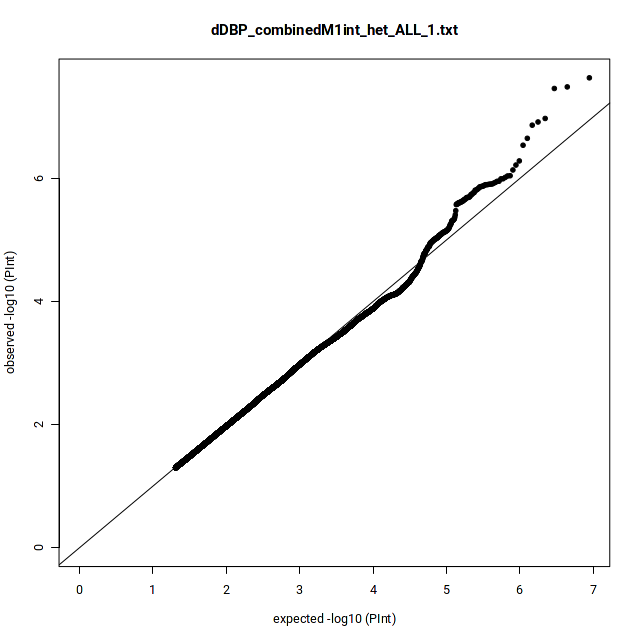 |
| SBP | 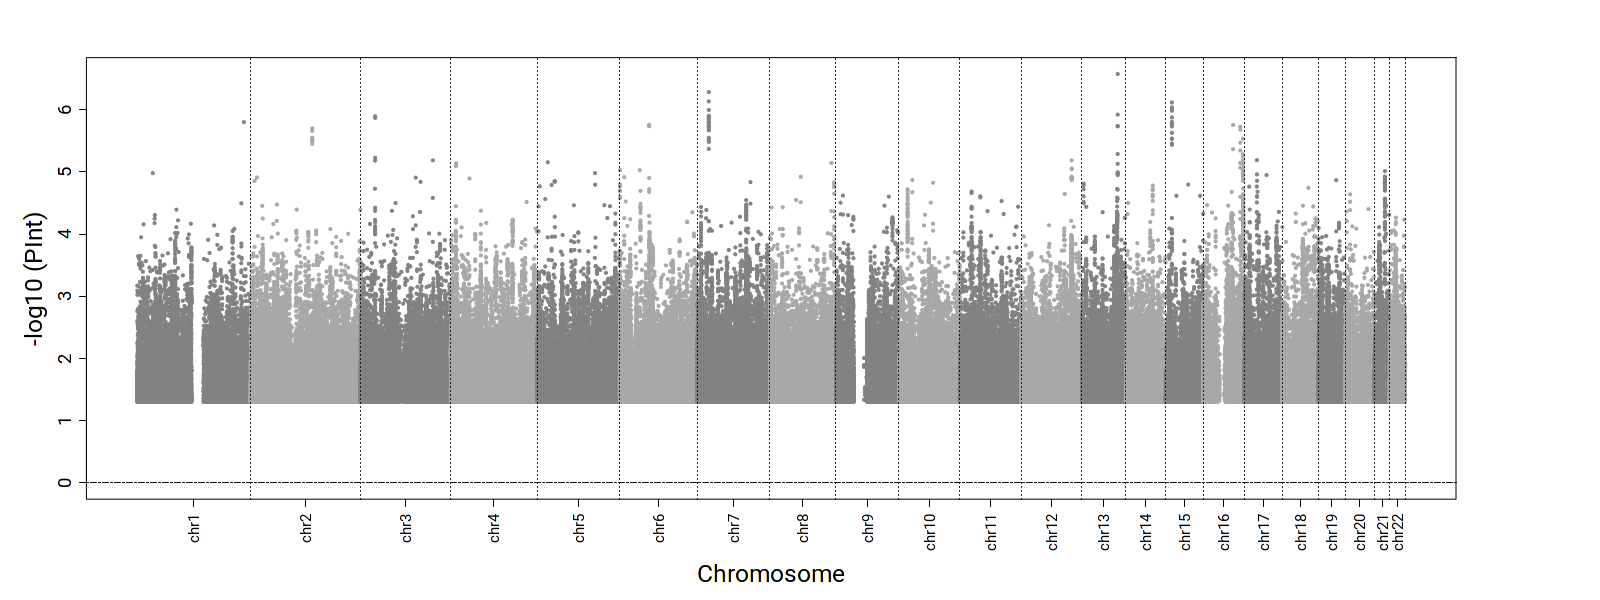 | λ = 1.00 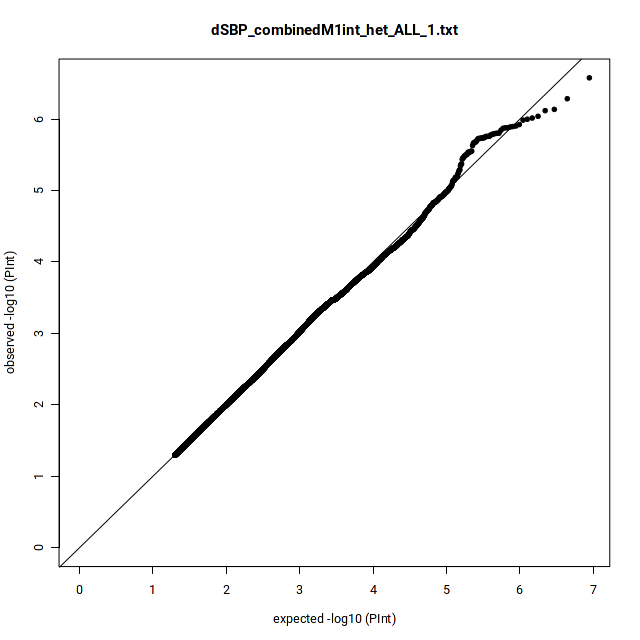 |
| PP | 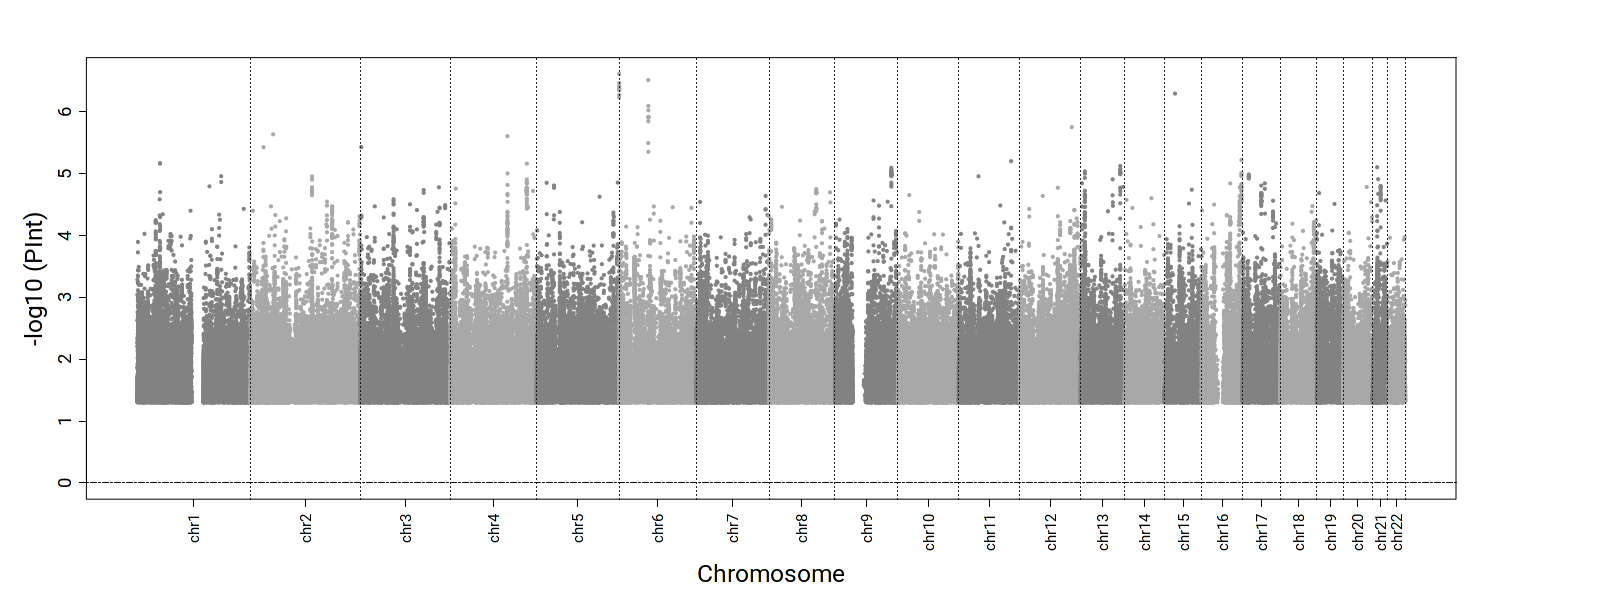 | λ = 0.98 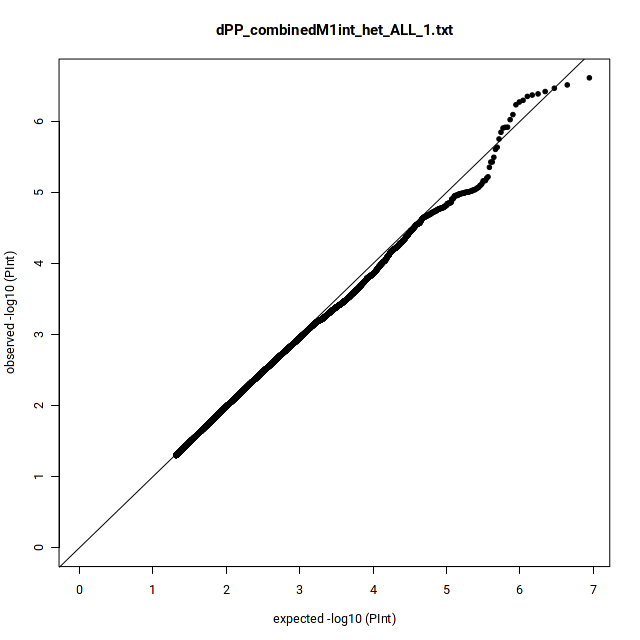 |

**Supplemental Figure 7.** Manhattan and QQ plots for the 2df joint and 1df interaction P-values in AFR-specific dDEPR analyses. (Green: known, Blue: novel)

| **2df joint P-value** | | |
| --- | --- | --- |
| DBP | 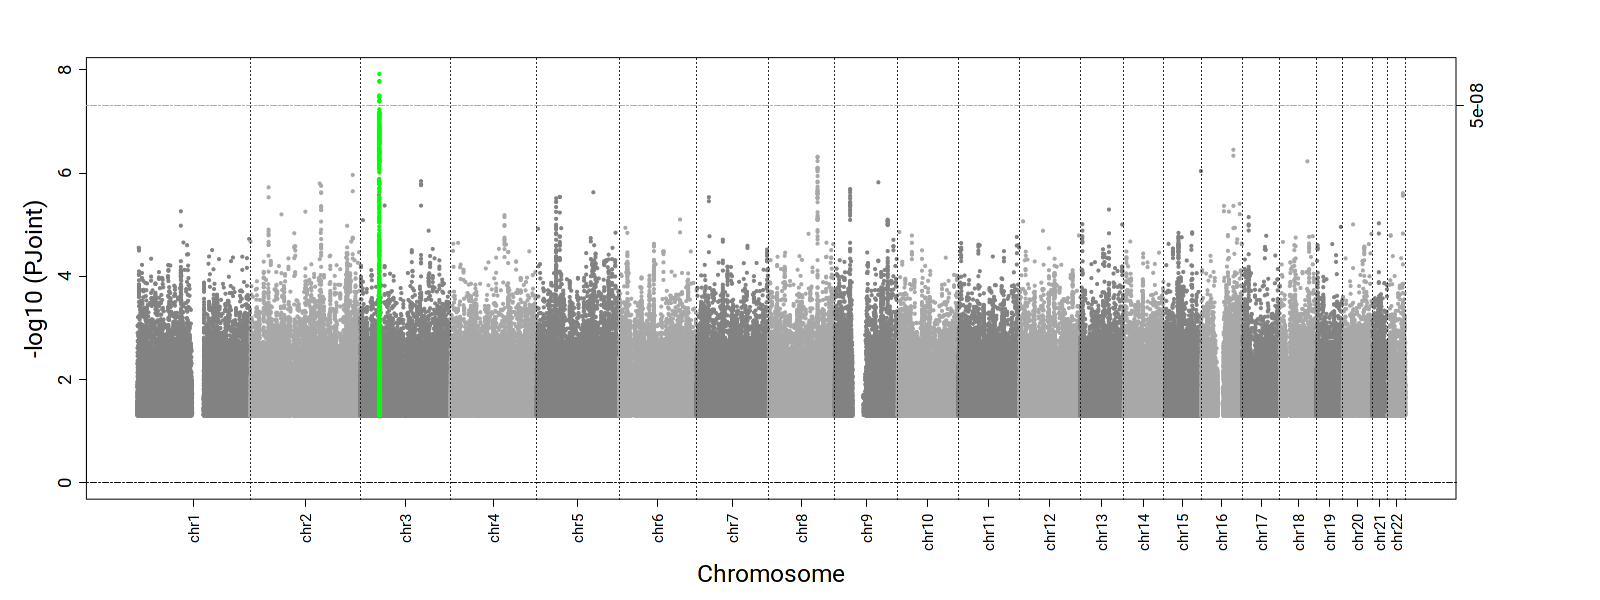 | λ = 1.03 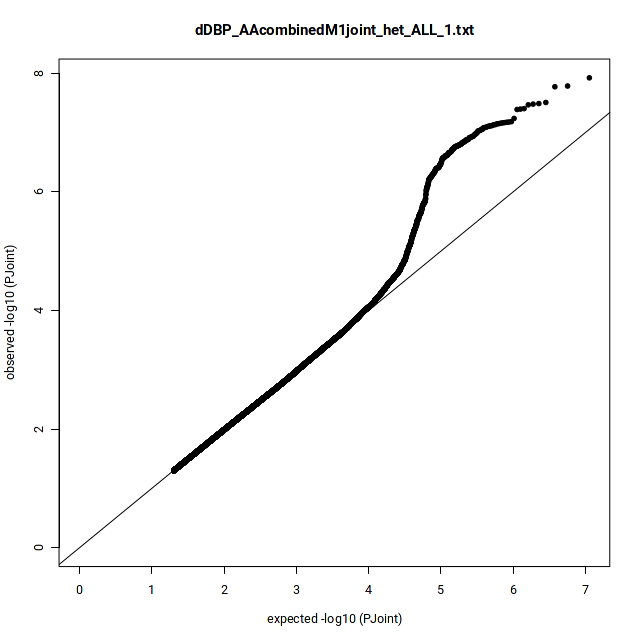 Ffdfdsfdsλsffdsfdfkl;jjkfldsfds |
| SBP | 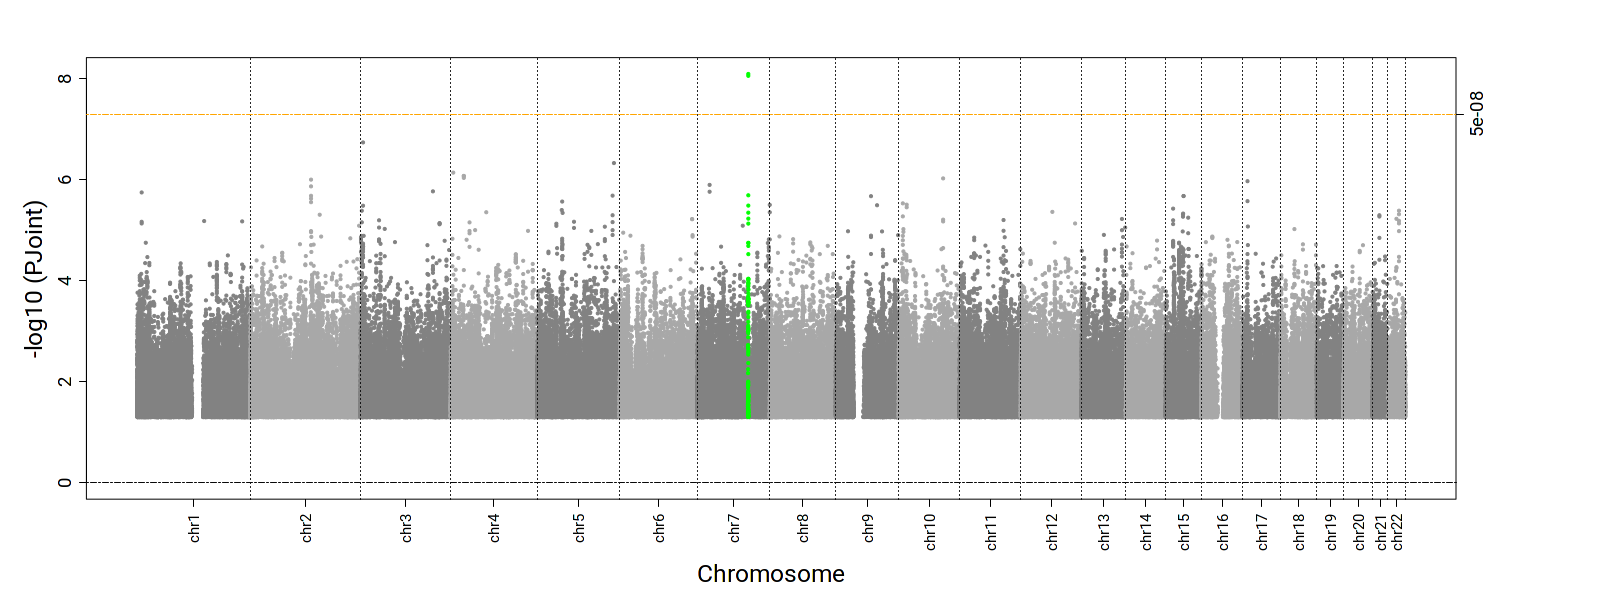 | λ = 1.01 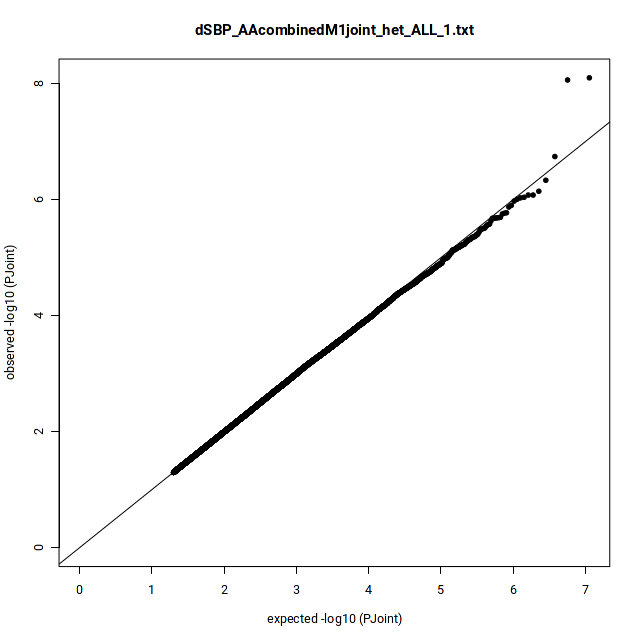 |
| PP | 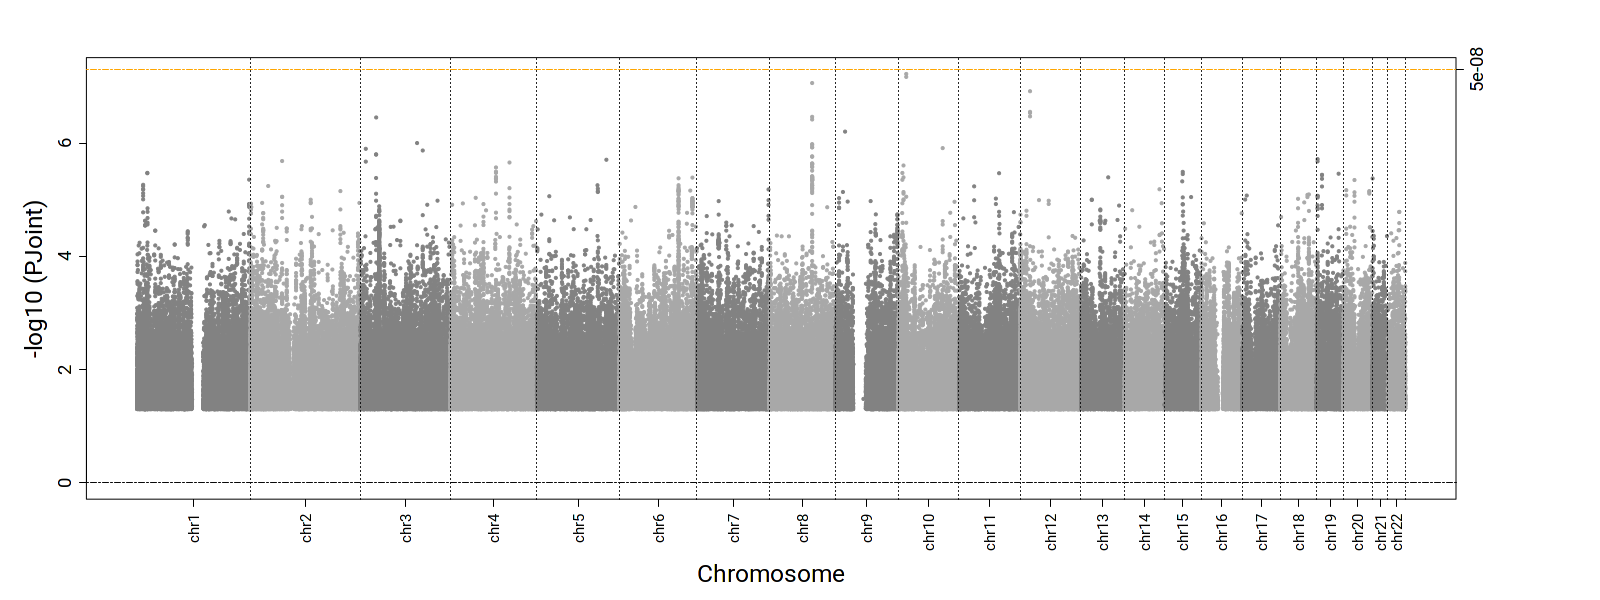 | λ = 1.03 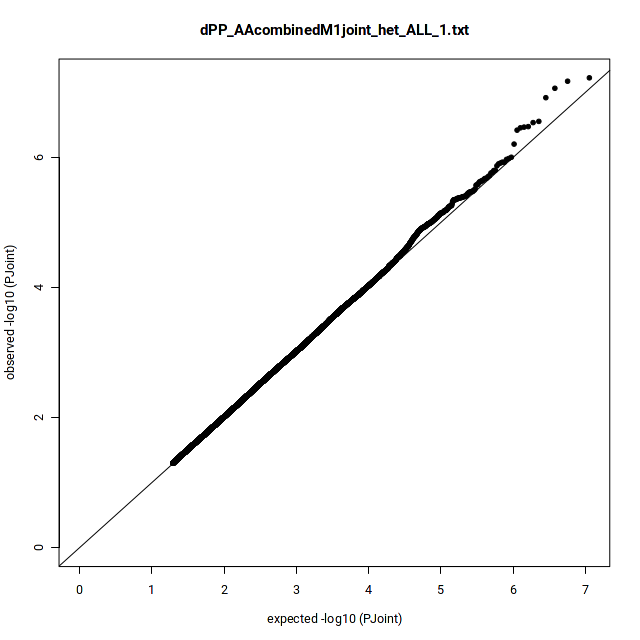 |
| **1df Interaction P-value** | | |
| DBP | 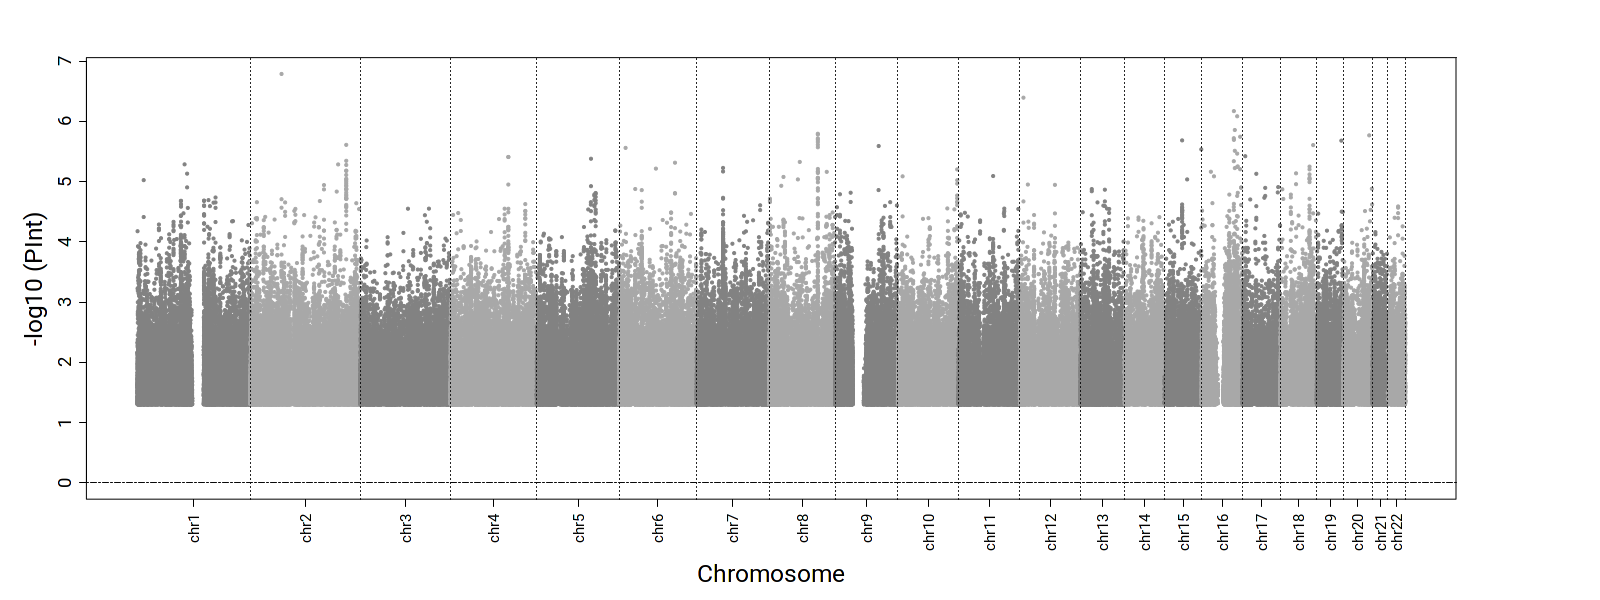 | λ = 0.99 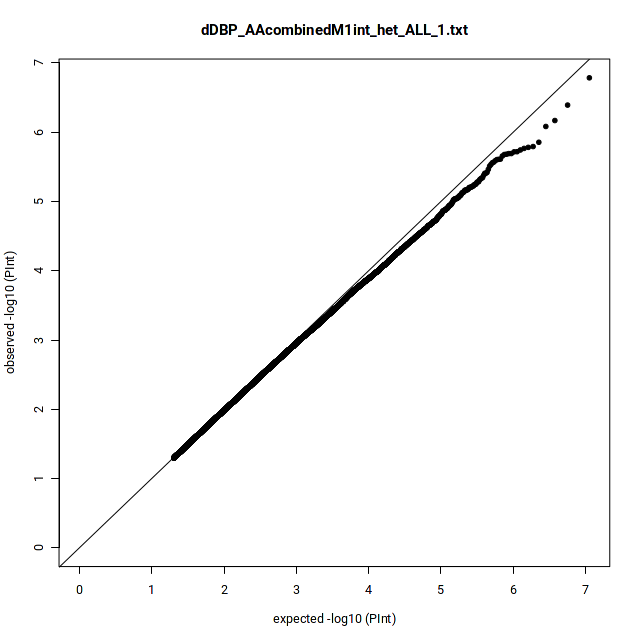 |
| SBP | 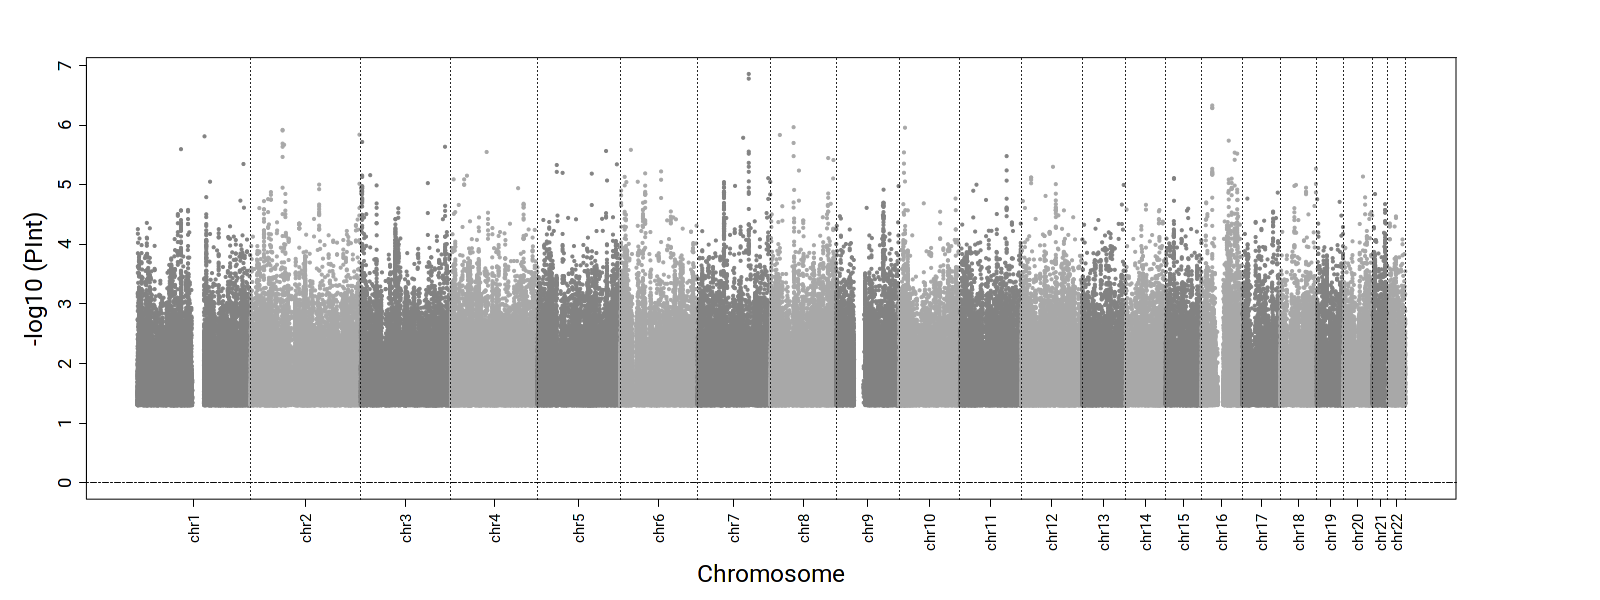 | λ = 1.00 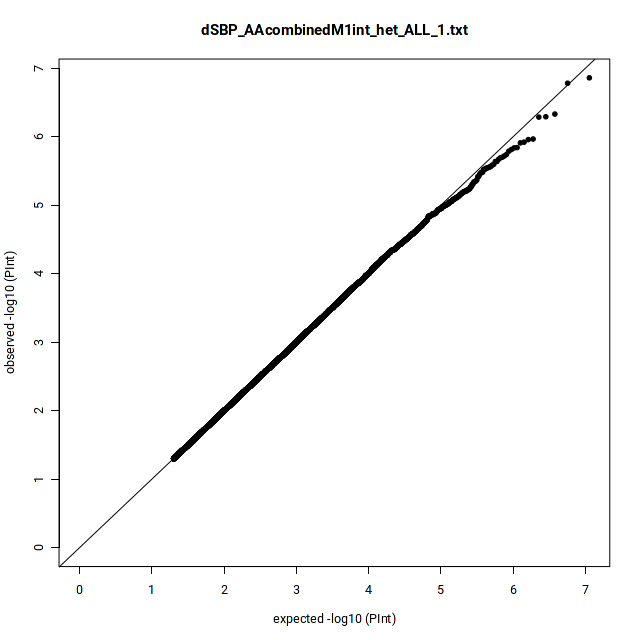 |
| PP | 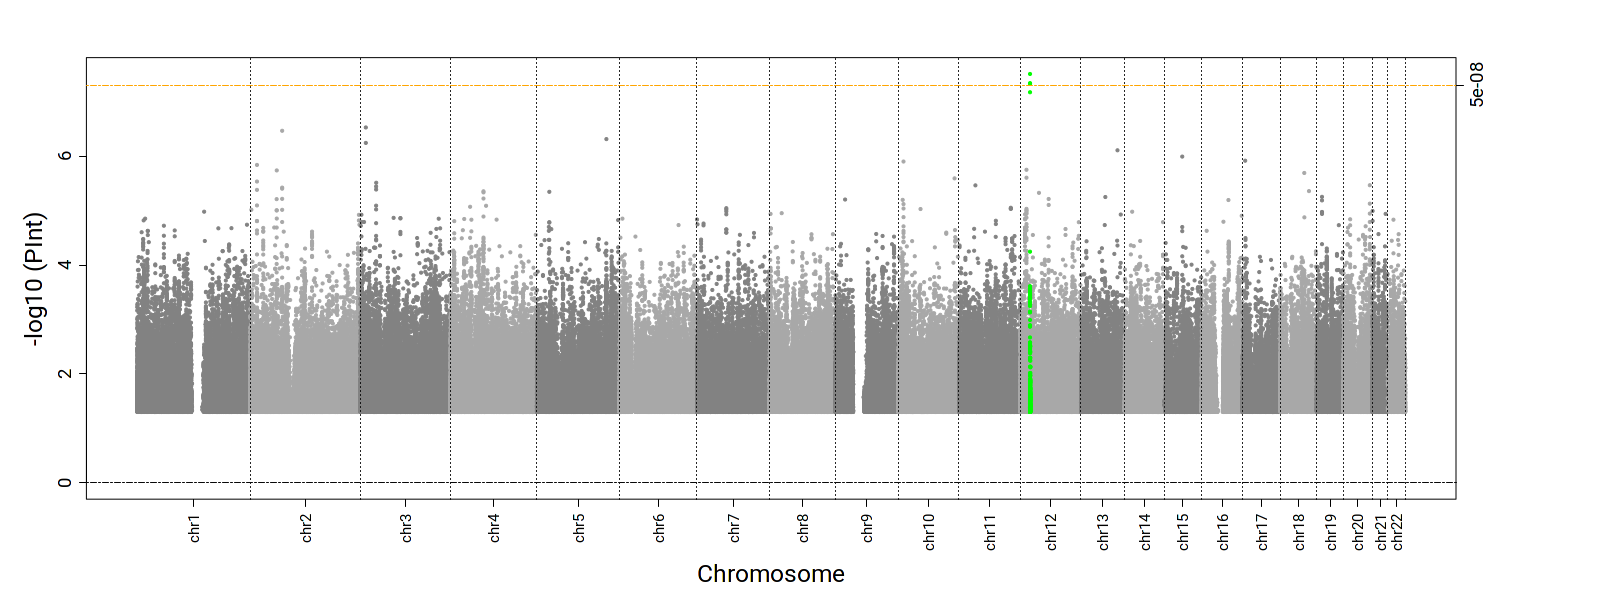 | λ = 0.98 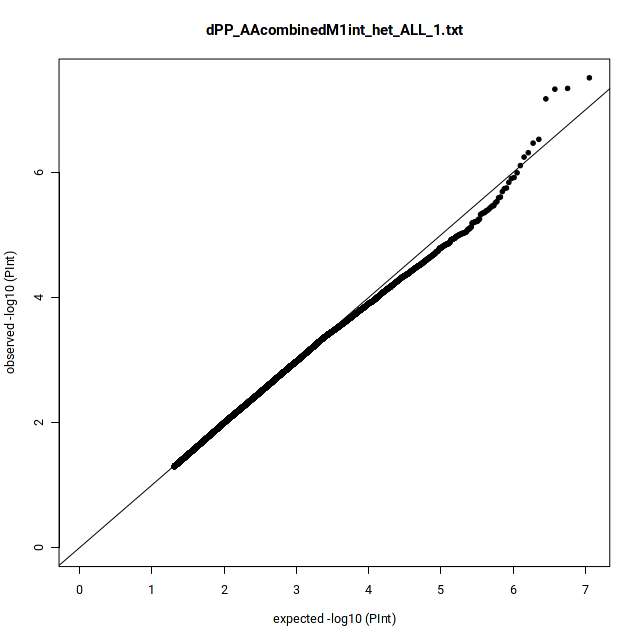 |

**Supplemental Figure 8**. Manhattan and QQ plots for the 2df joint and 1df interaction P-values in ASN-specific dDEPR analyses. (Green: known, Blue: novel)

| **2df joint P-value** | | |
| --- | --- | --- |
| DBP | 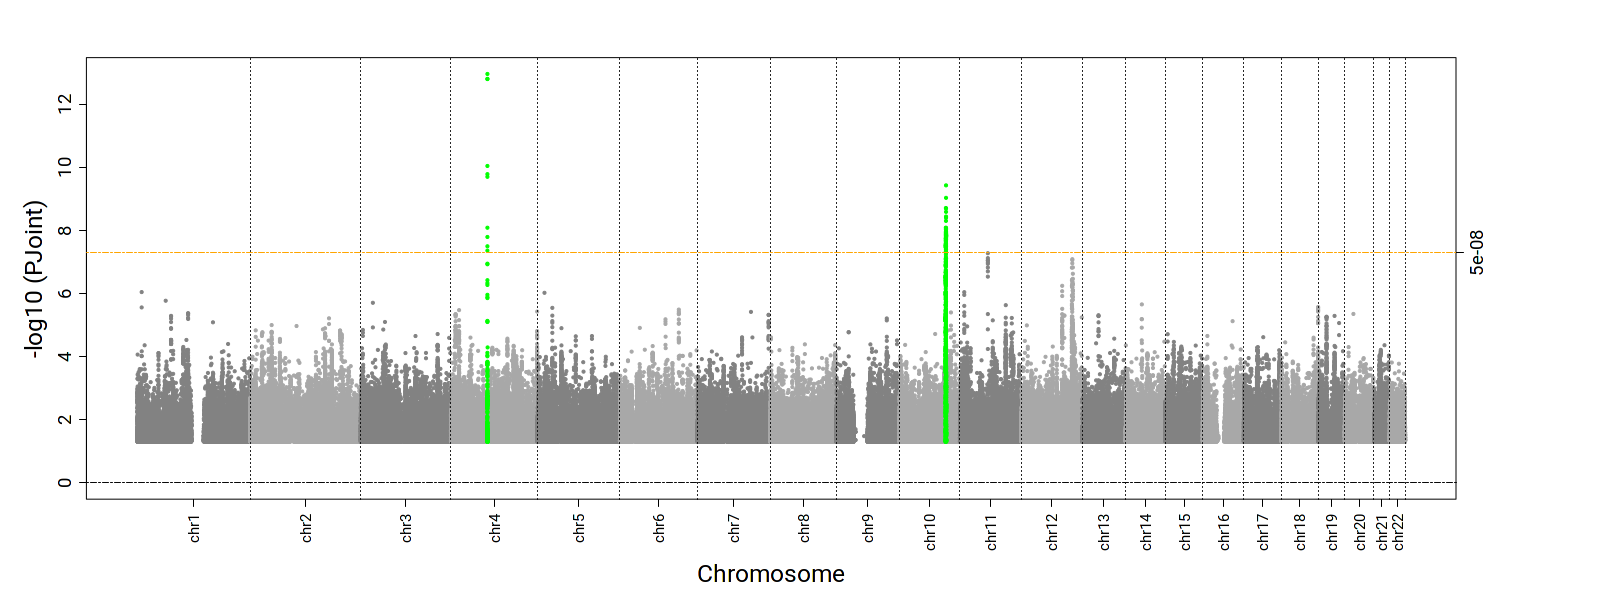 | λ = 1.03 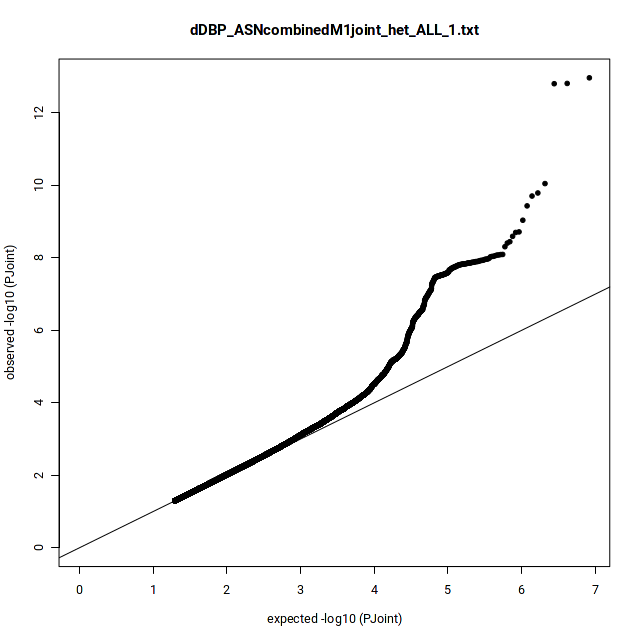 Ffdfdsfdsλsffdsfdfkl;jjkfldsfds |
| SBP | 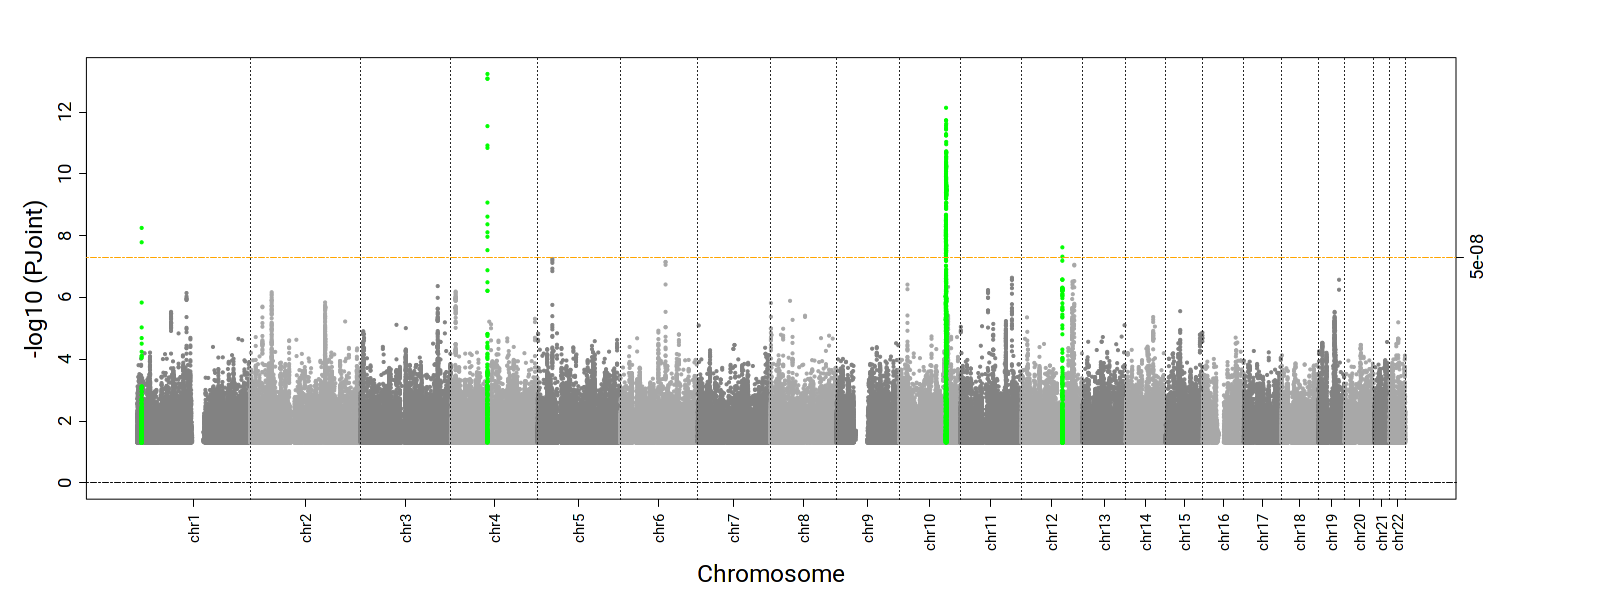 | λ = 1.01 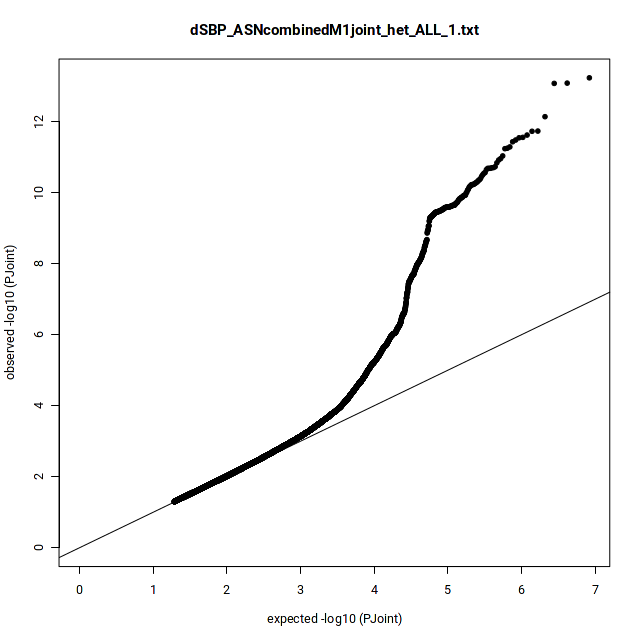 |
| PP | 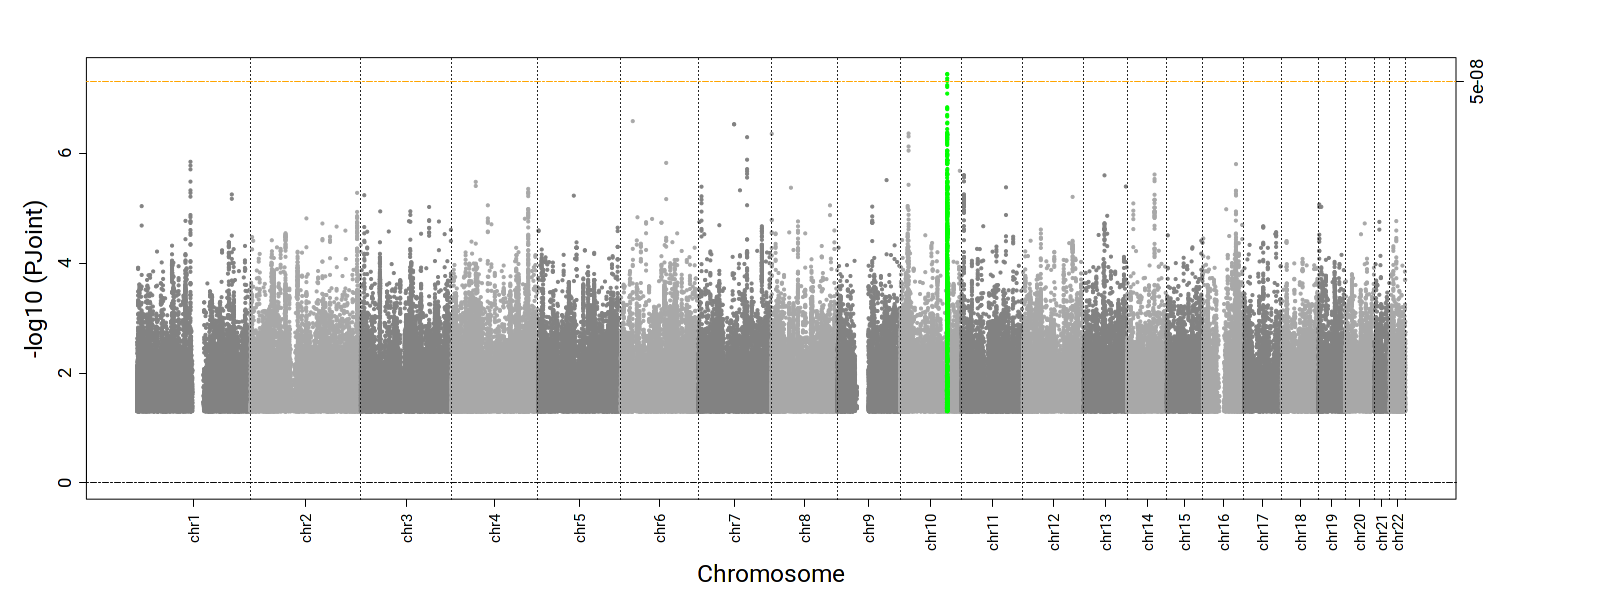 | λ = 1.03 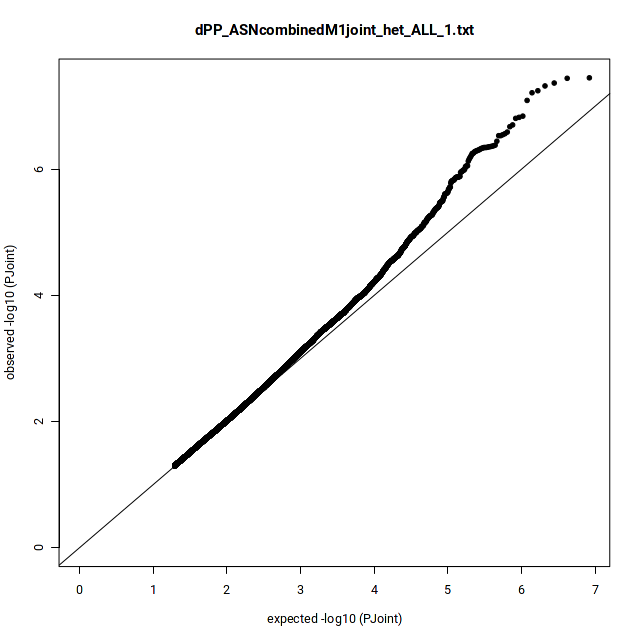 |
| **1df Interaction P-value** | | |
| DBP | 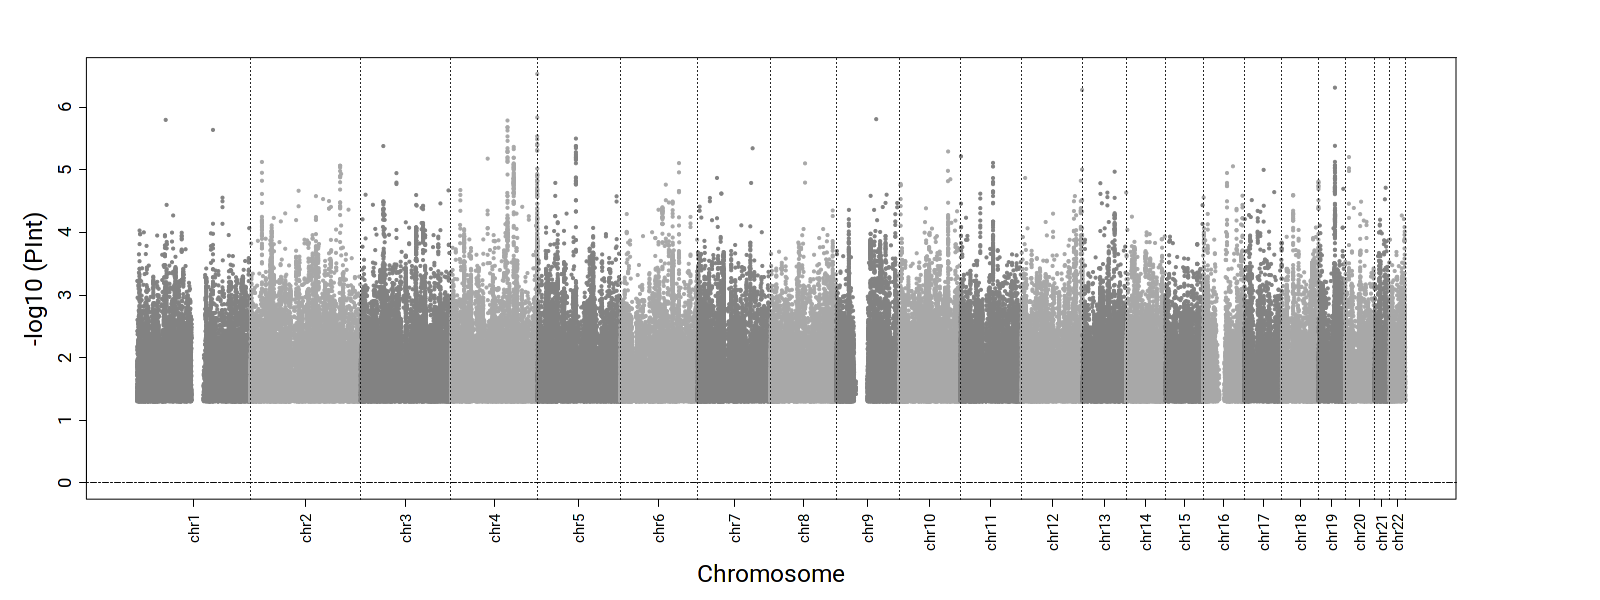 | λ = 1.03 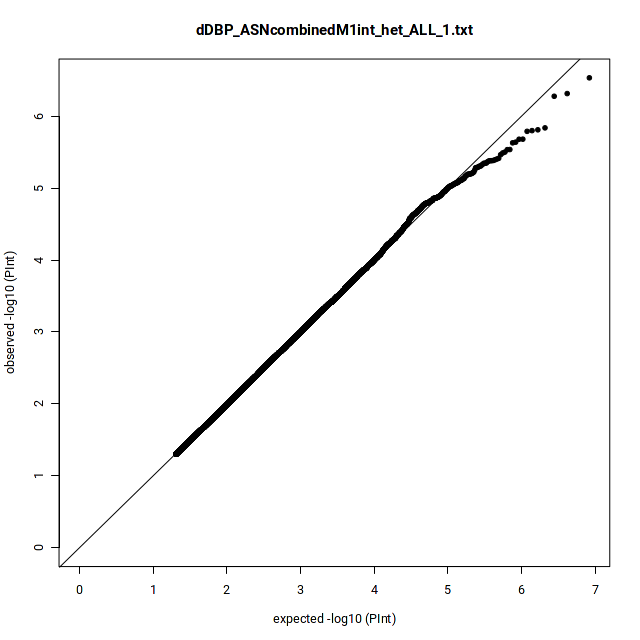 |
| SBP | 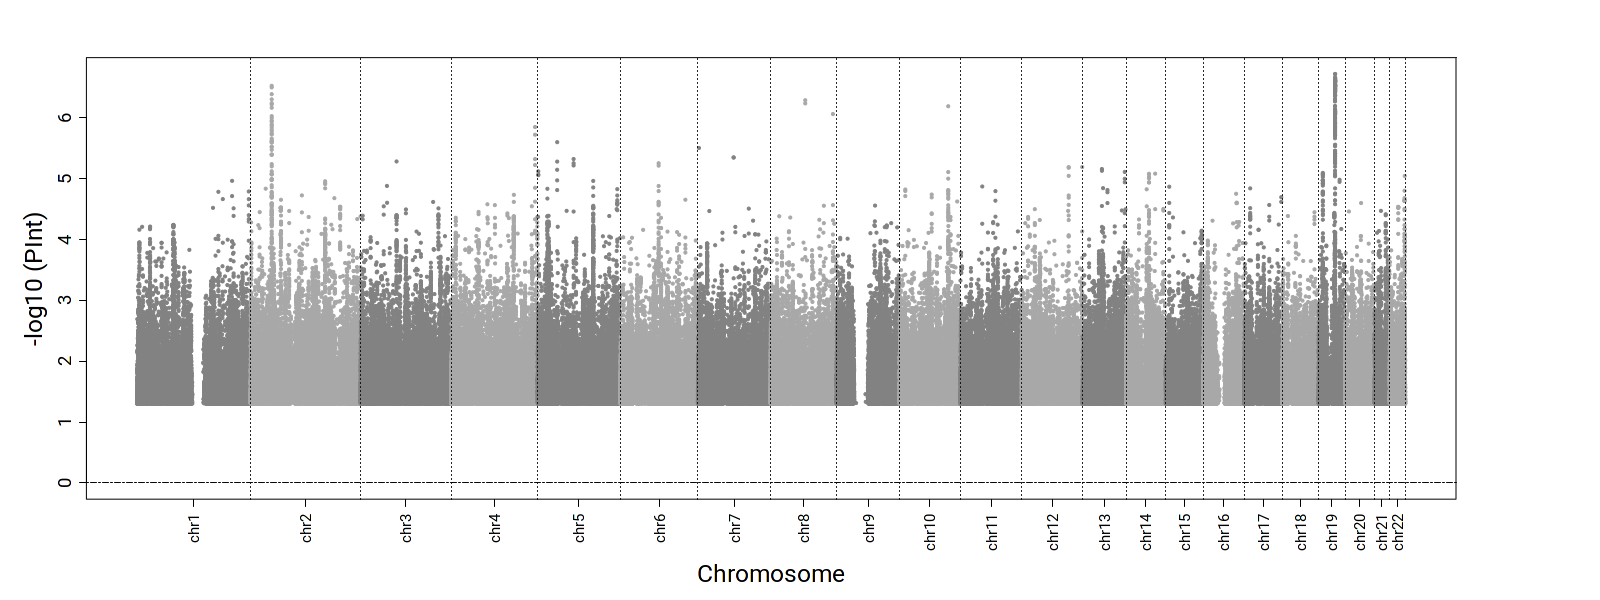 | λ = 1.02 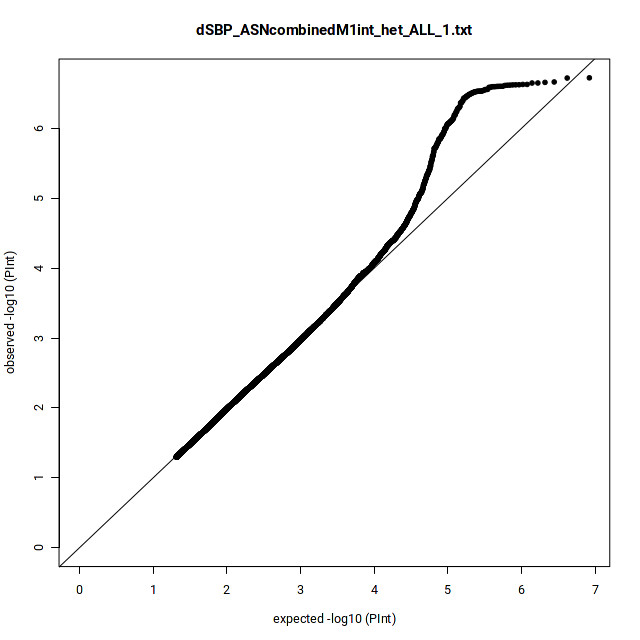 |
| PP | 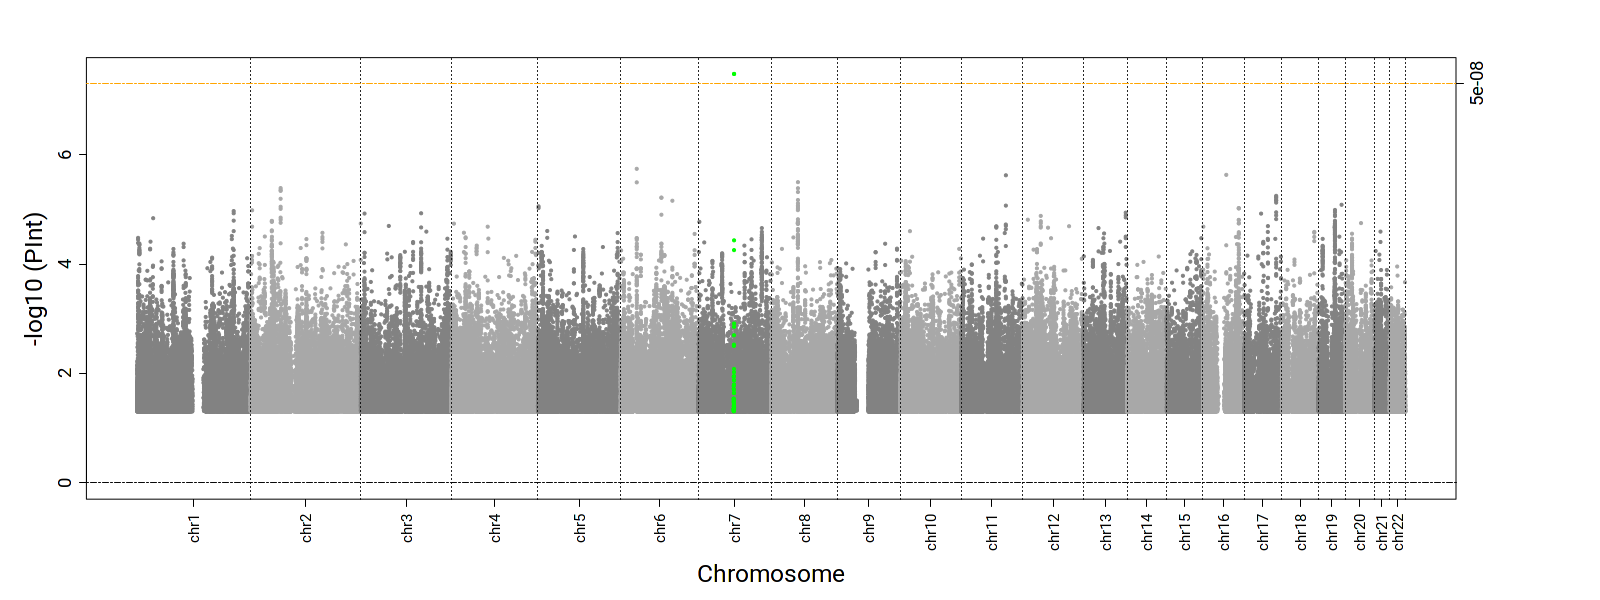 | λ = 1.01 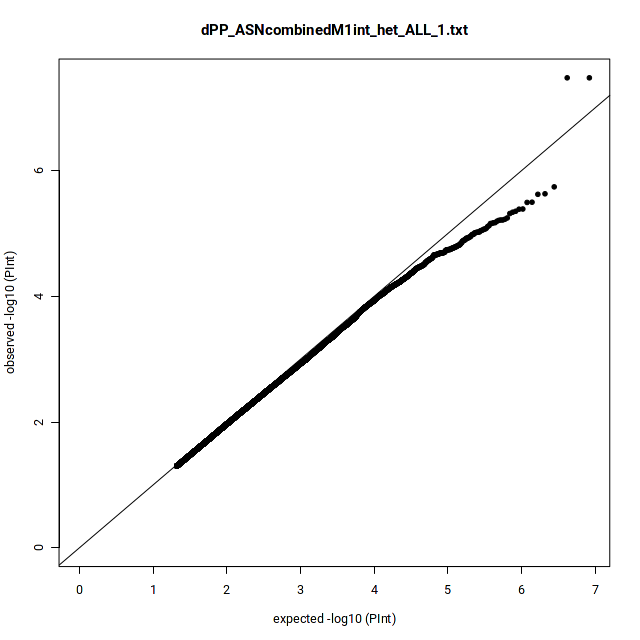 |

**Supplemental Figure 9**. Manhattan and QQ plots for the 2df joint and 1df interaction P-values in HIS-specific dDEPR analyses. (Green: known, Blue: novel)

| **2df joint P-value** | | |
| --- | --- | --- |
| DBP | 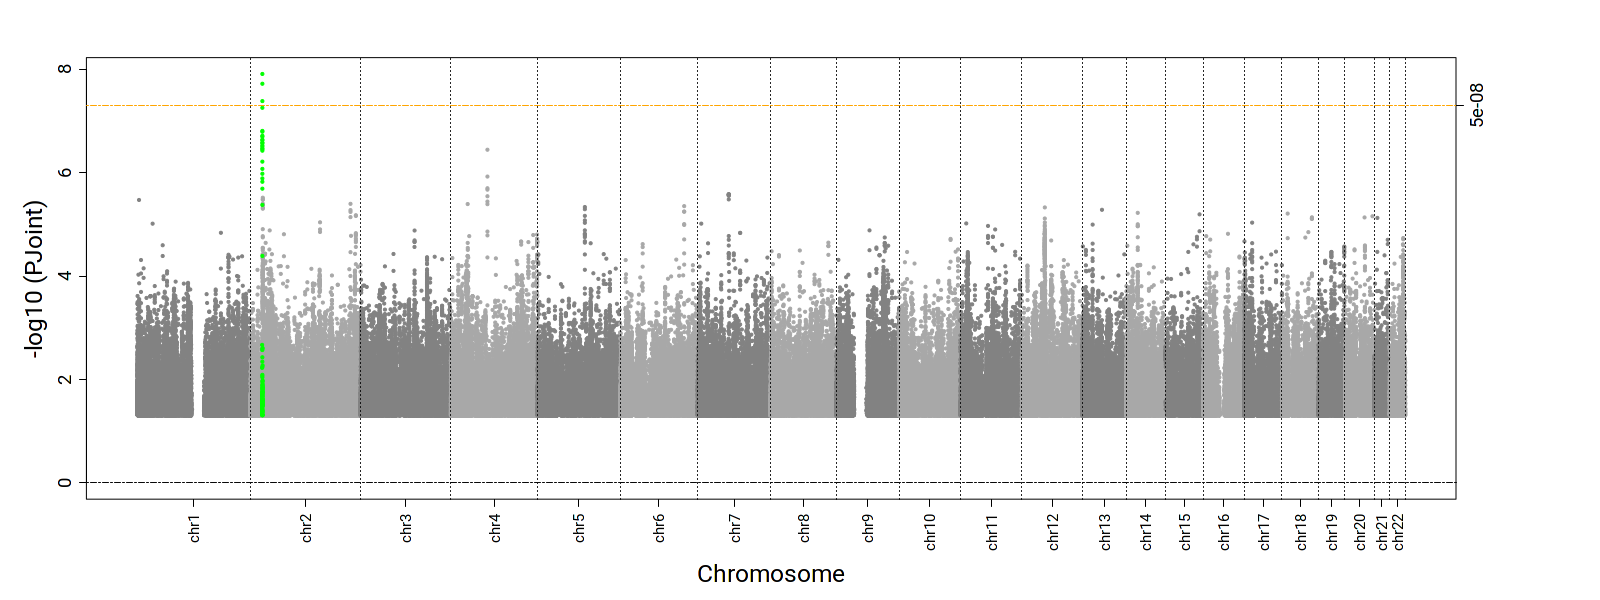 | λ = 1.01 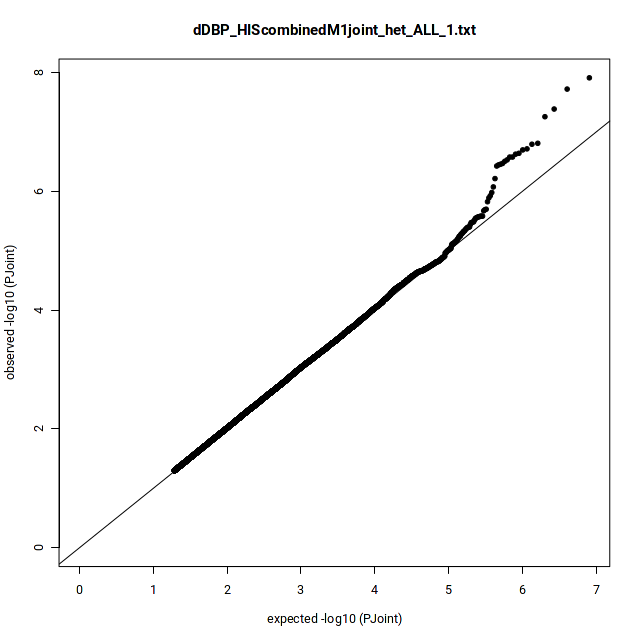 Ffdfdsfdsλsffdsfdfkl;jjkfldsfds |
| SBP | 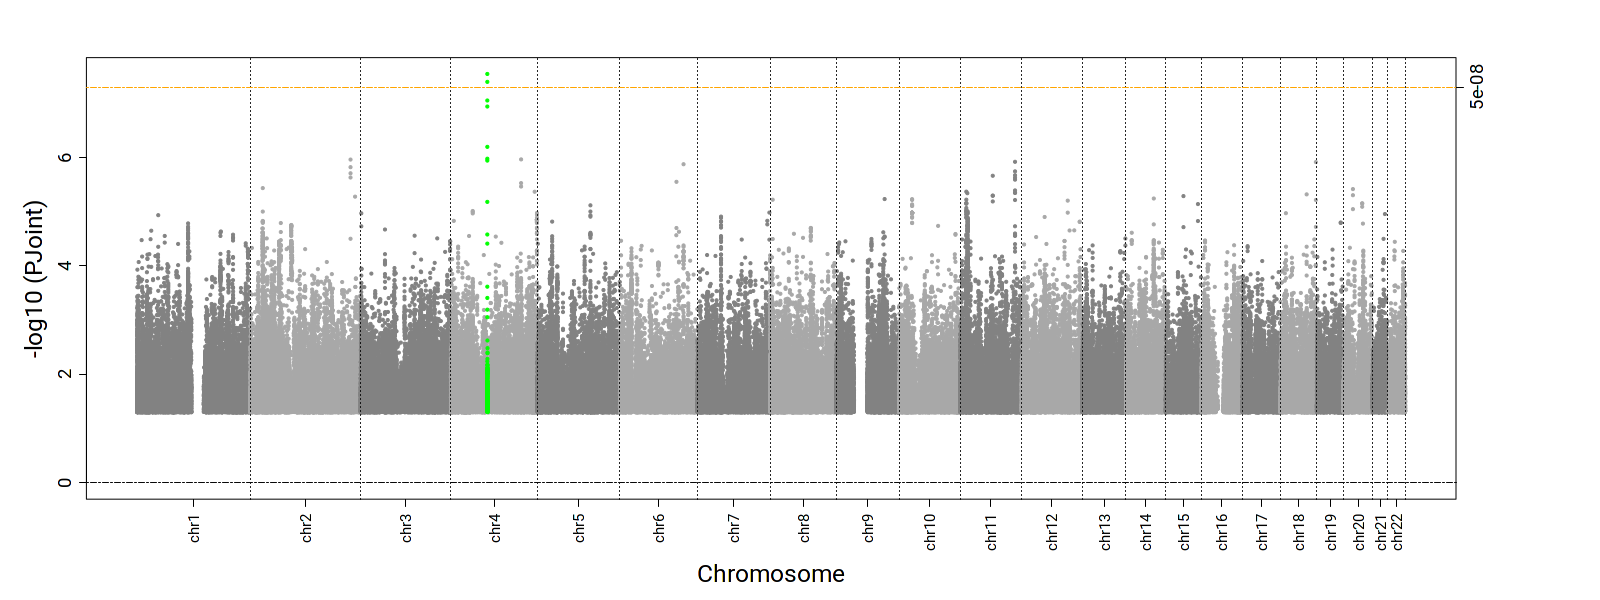 | λ = 0.97 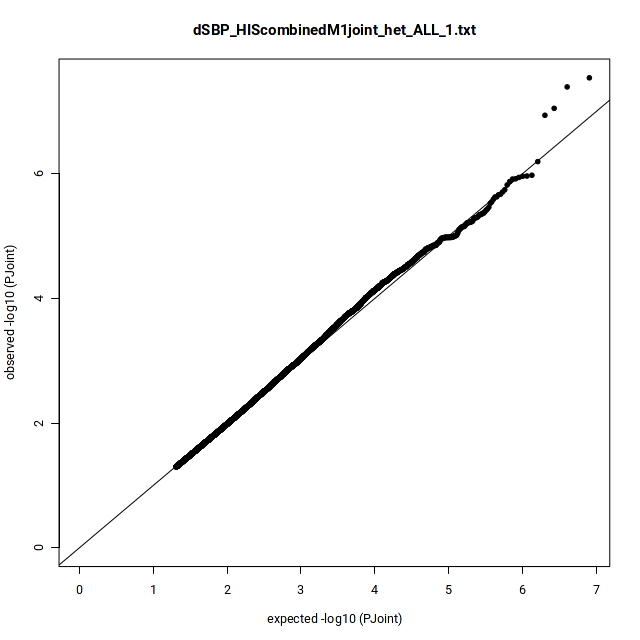 |
| PP | 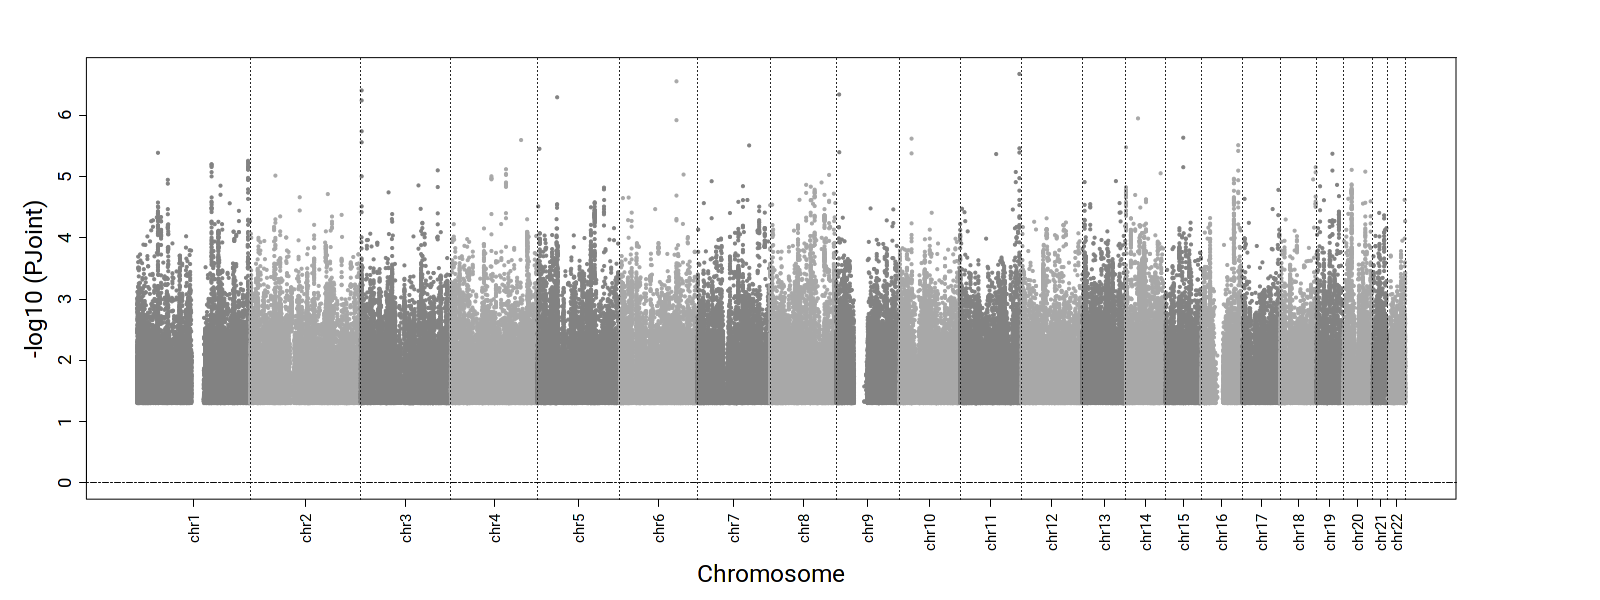 | λ = 0.96 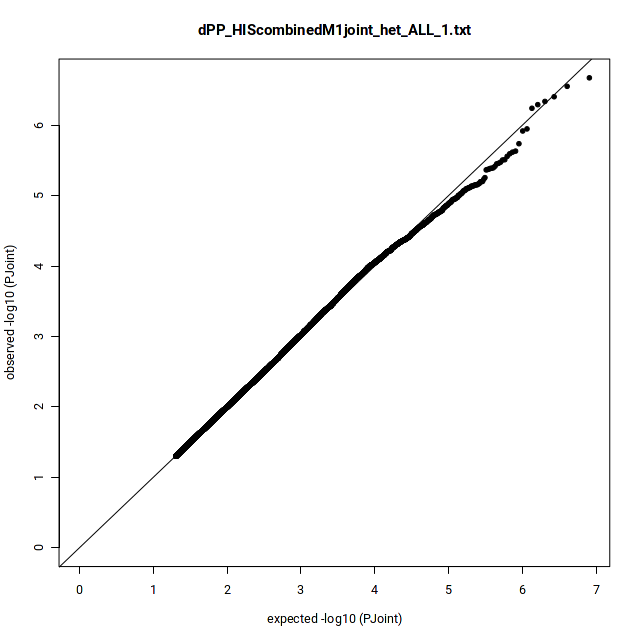 |
| **1df Interaction P-value** | | |
| DBP | 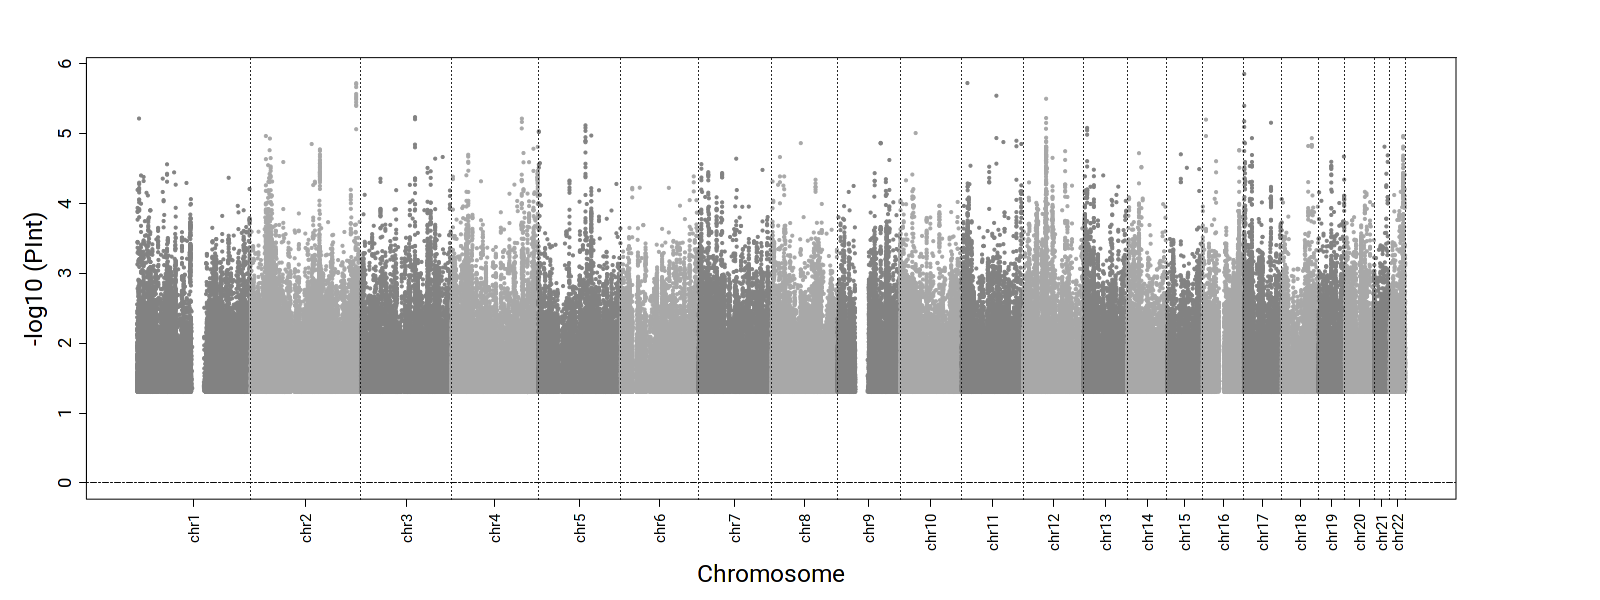 | λ = 1.00 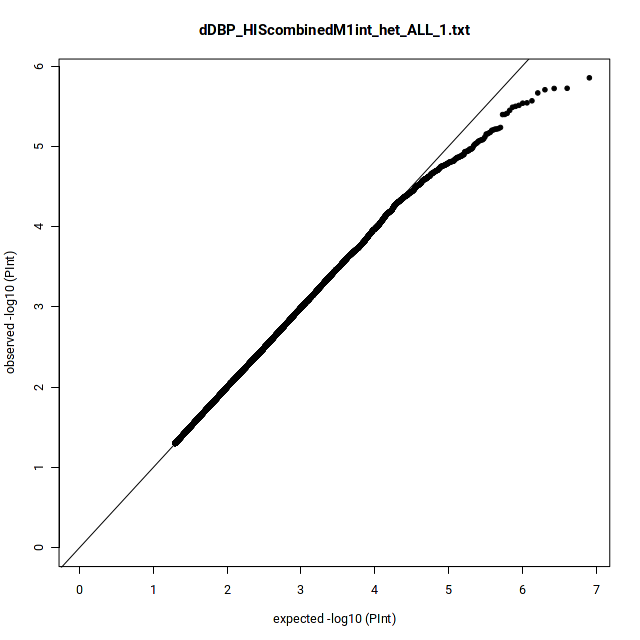 |
| SBP | 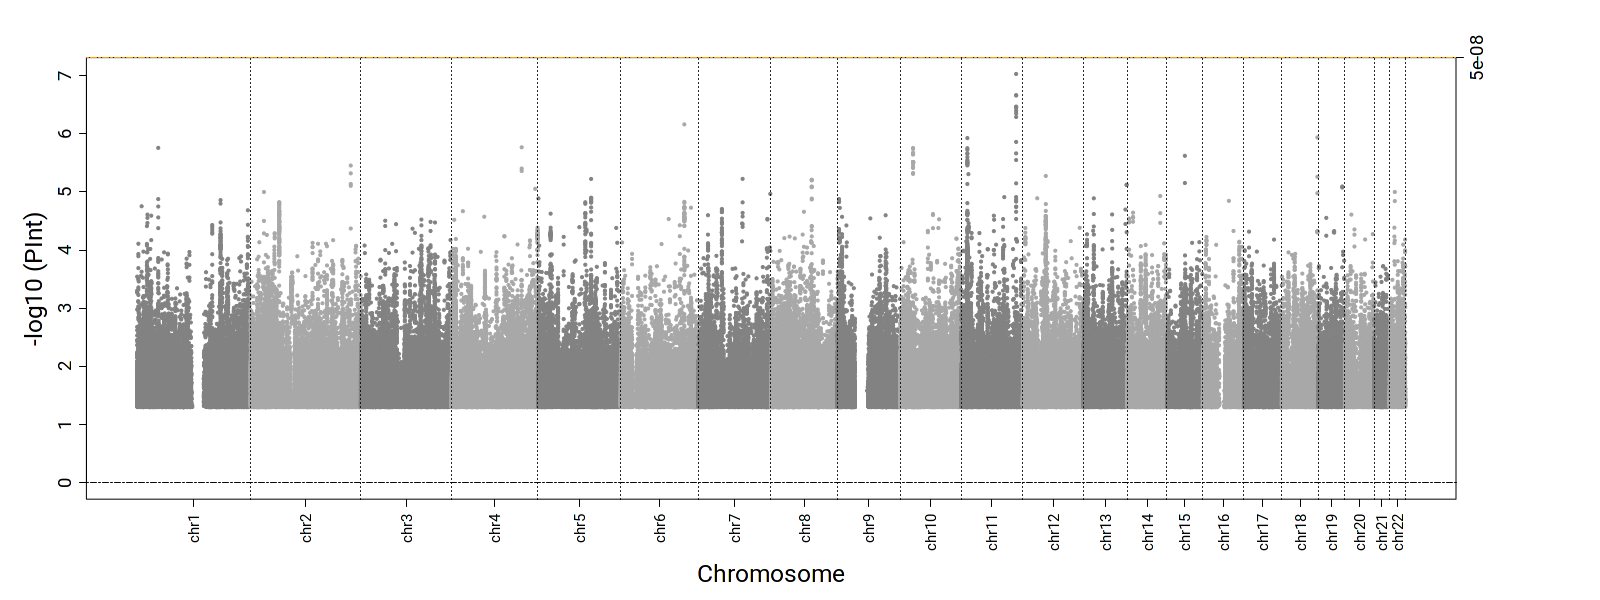 | λ = 0.96 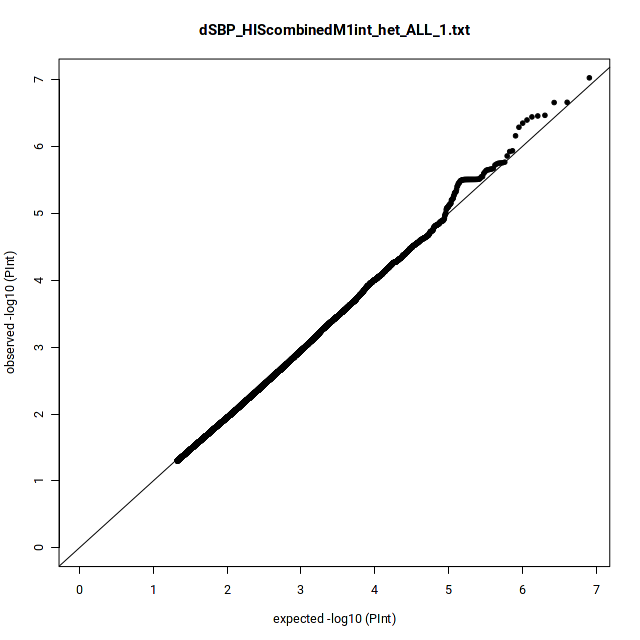 |
| PP | 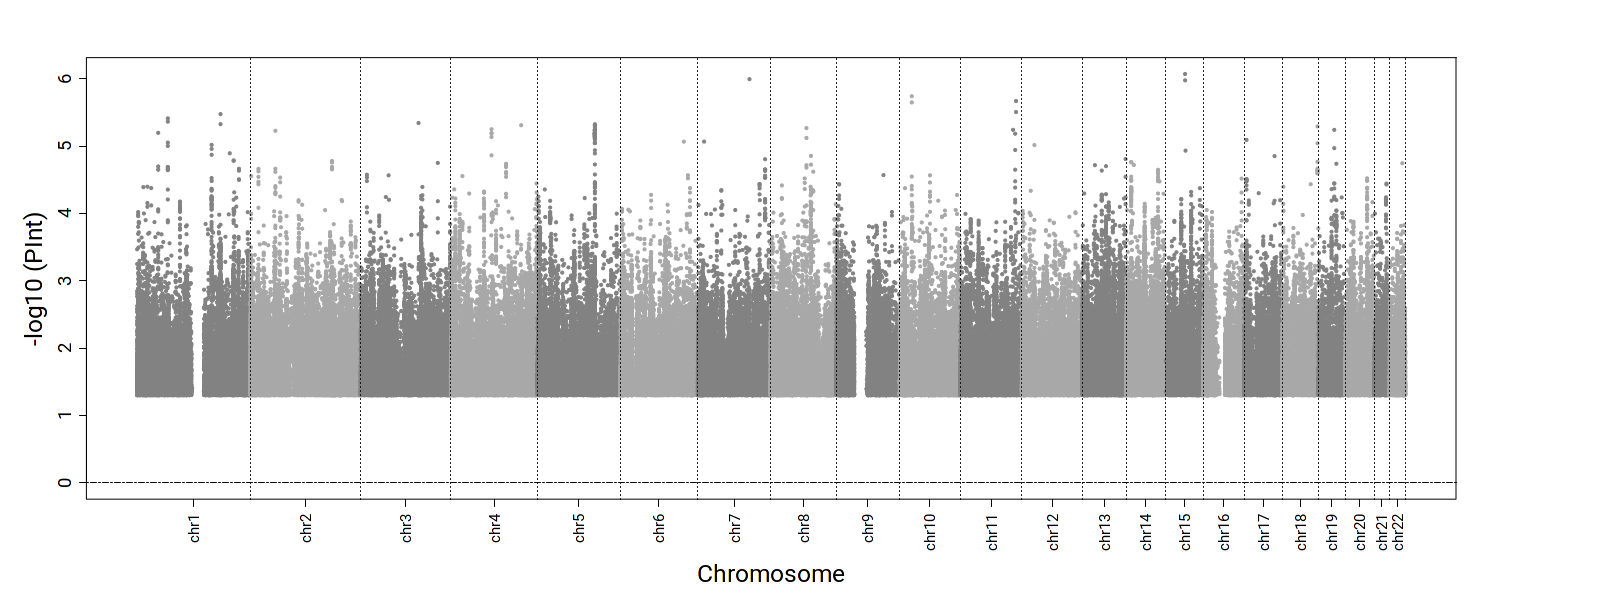 | λ = 0.97 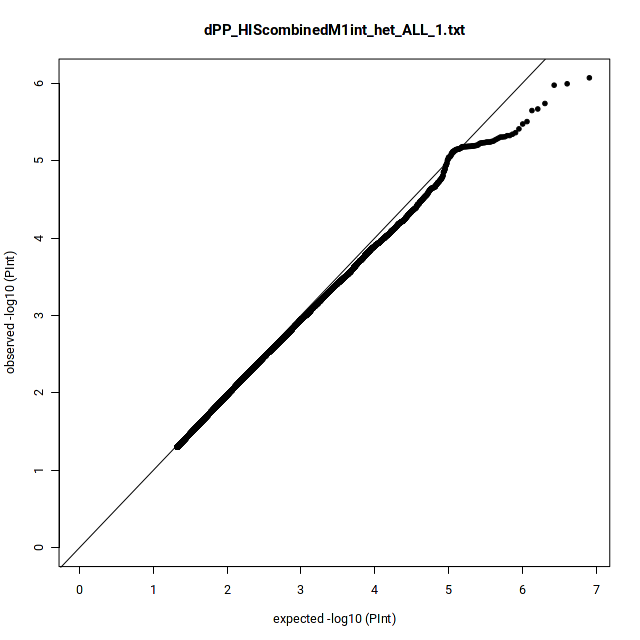 |

**Supplemental Figure 10.** Manhattan and QQ plots for the 2df joint and 1df interaction P-values in cross-population qDEPR analyses. (Green: known, Blue: novel)

| **2df joint P-value** | | |
| --- | --- | --- |
| DBP | 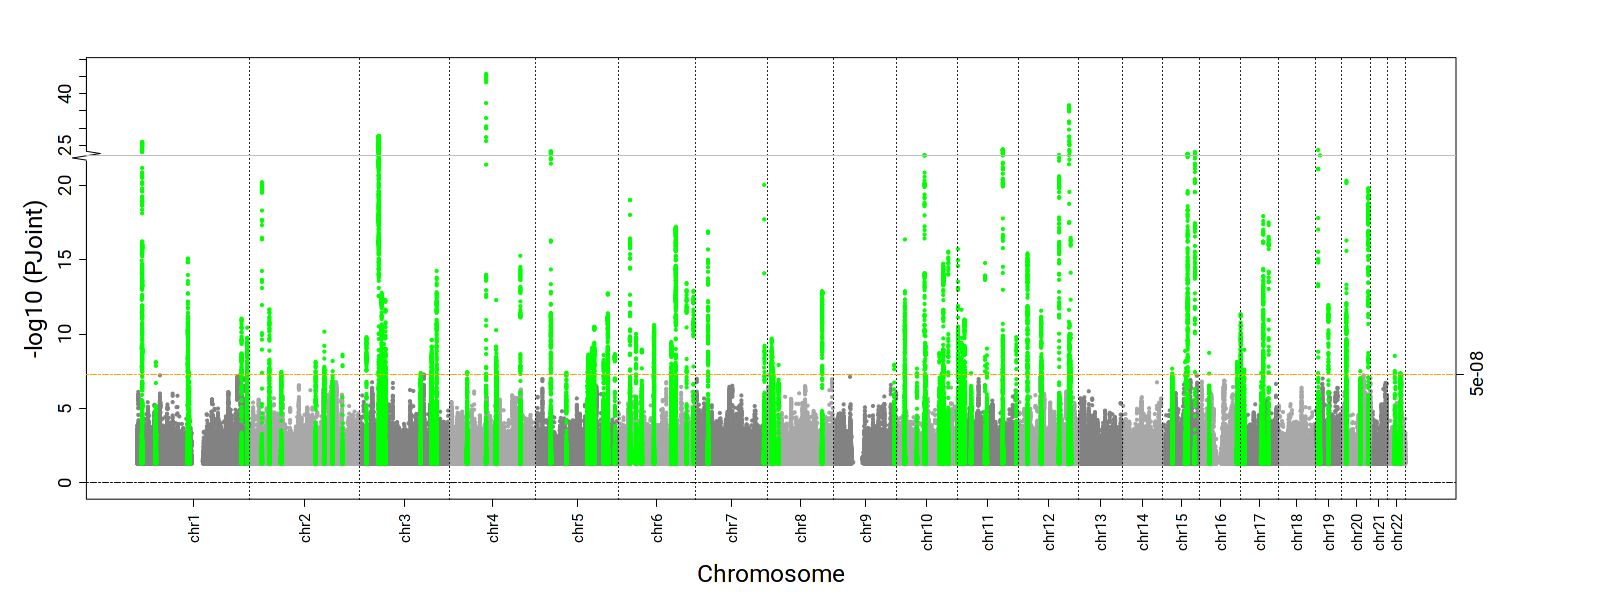 | λ = 1.08 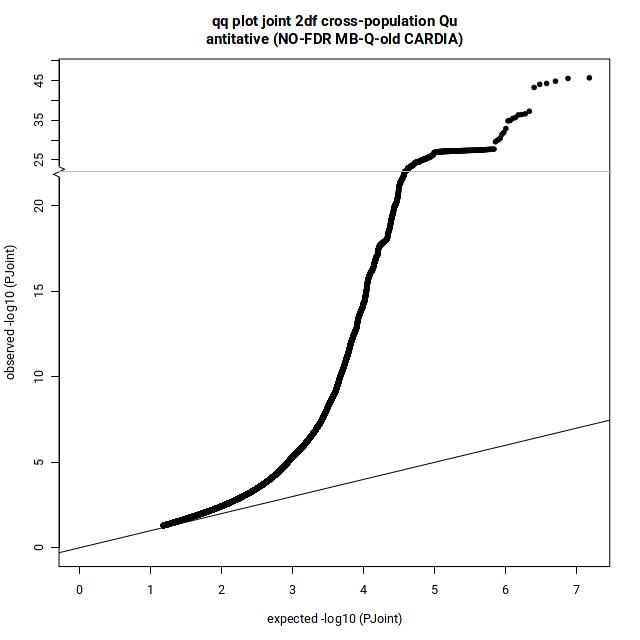 Ffdfdsfdsλsffdsfdfkl;jjkfldsfds |
| SBP | 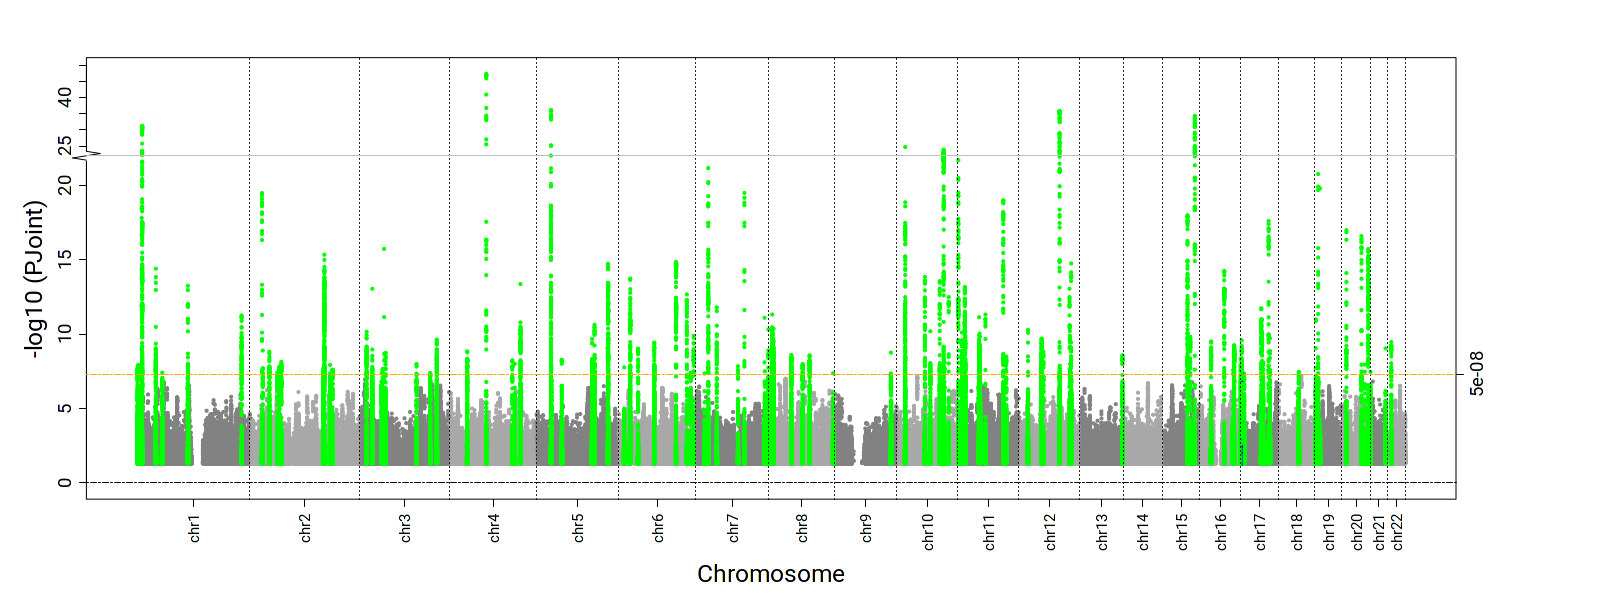 | λ = 1.09 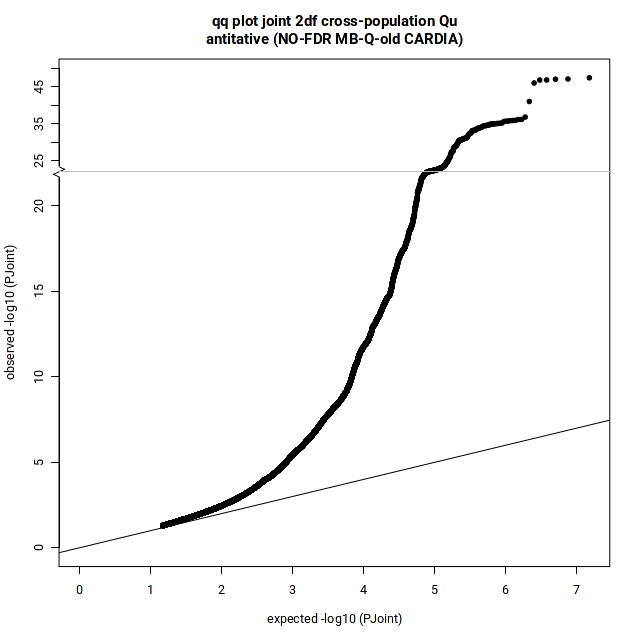 |
| PP | 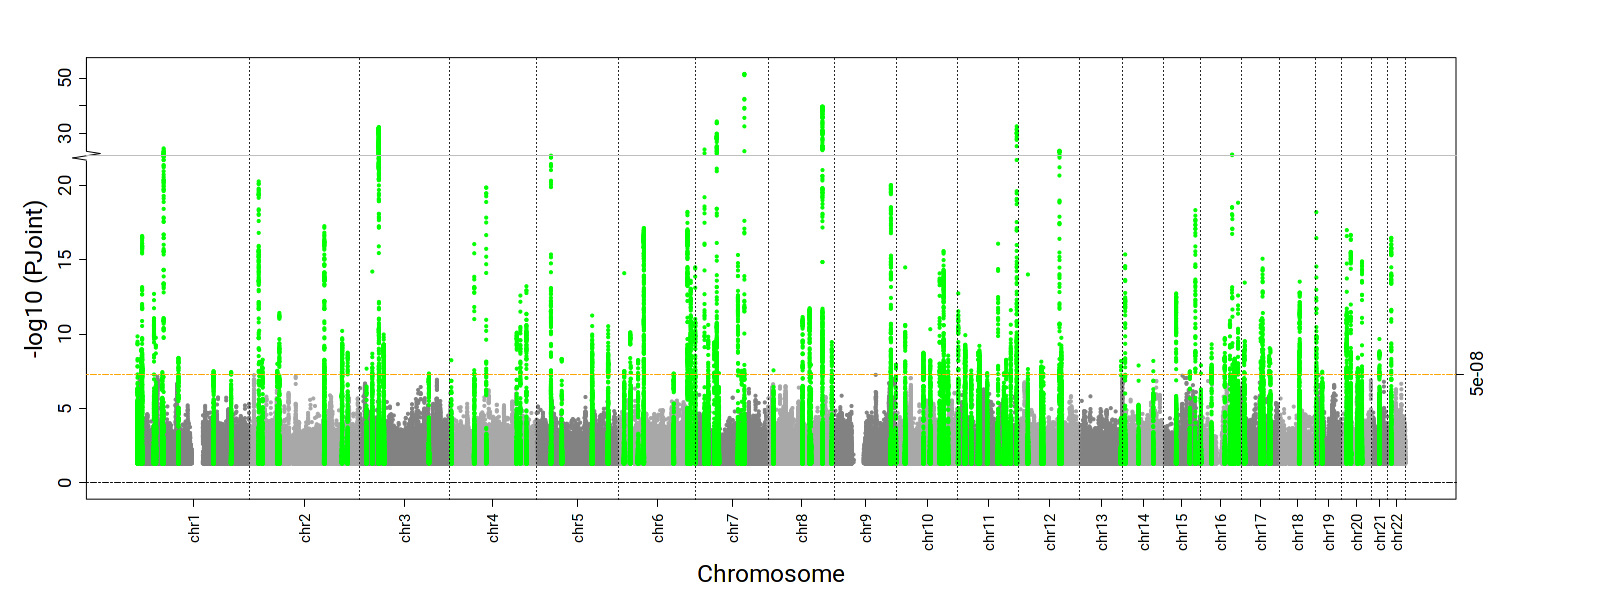 | λ = 1.09 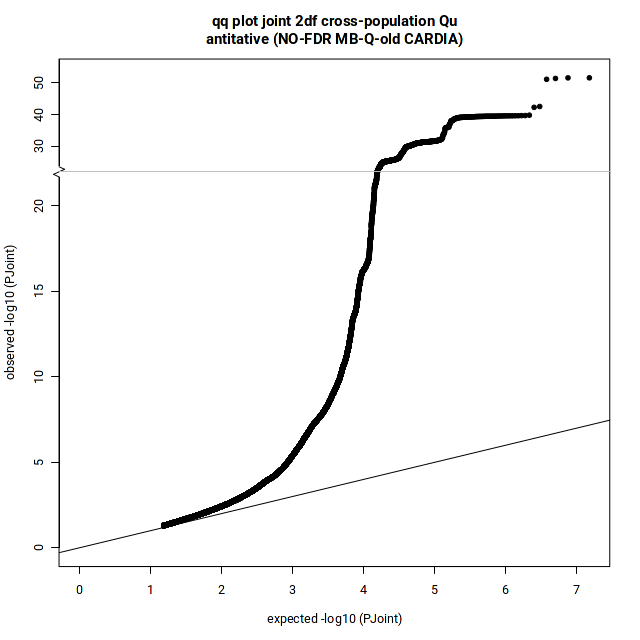 |
| **1df Interaction P-value** | | |
| DBP | 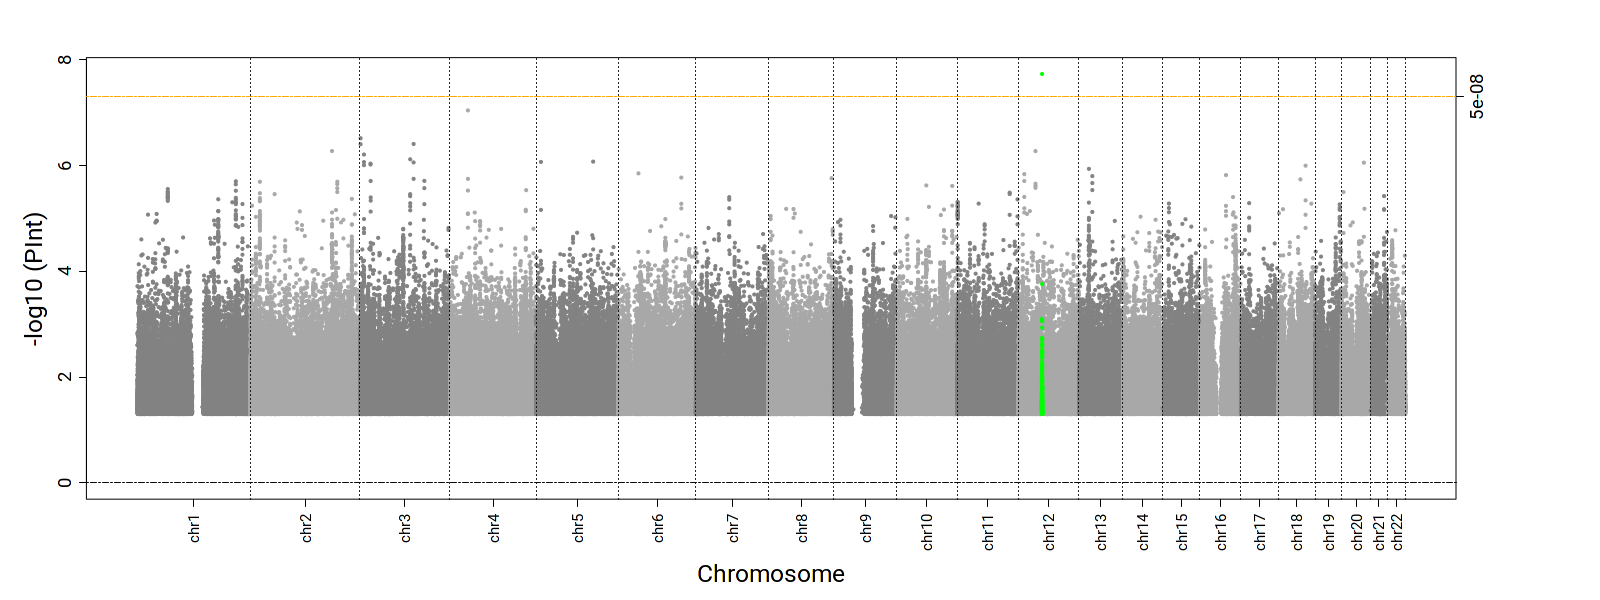 | λ = 0.98 |
| SBP |  | λ = 1.00 |
| PP |  | λ = 1.00 |

**Supplemental Figure 11.** Manhattan and QQ plots for the 2df joint and 1df interaction P-values in EUR-specific qDEPR analyses. (Green: known, Blue: novel)

| **2df joint P-value** | | |
| --- | --- | --- |
| DBP |  | λ = 1.28  Ffdfdsfdsλsffdsfdfkl;jjkfldsfds |
| SBP |  | λ = 1.27 |
| PP |  | λ = 1.30 |
| **1df Interaction P-value** | | |
| DBP |  | λ = 1.00 |
| SBP |  | λ = 1.00 |
| PP |  | λ = 0.98 |

**Supplemental Figure 12**. Manhattan and QQ plots for the 2df joint and 1df interaction P-values in AFR –specific qDEPR analyses. (Green: known, Blue: novel)

| **2df joint P-value** | | |
| --- | --- | --- |
| DBP |  | λ = 1.02  Ffdfdsfdsλsffdsfdfkl;jjkfldsfds |
| SBP |  | λ = 1.01 |
| PP |  | λ = 1.00 |
| **1df Interaction P-value** | | |
| DBP |  | λ = 1.03 |
| SBP |  | λ = 1.01 |
| PP |  | λ = 1.01 |

**Supplemental Figure 13**. Manhattan and QQ plots for the 2df joint and 1df interaction P-values in ASN-specific qDEPR analyses. (Green: known, Blue: novel)

| **2df joint P-value** | | |
| --- | --- | --- |
| DBP |  | λ = 1.01  Ffdfdsfdsλsffdsfdfkl;jjkfldsfds |
| SBP |  | λ = 1.02 |
| PP |  | λ = 1.01 |
| **1df Interaction P-value** | | |
| DBP |  | λ = 1.03 |
| SBP |  | λ = 1.02 |
| PP |  | λ = 1.01 |

**Supplemental Figure 14**. Manhattan and QQ plots for the 2df joint and 1df interaction P-values in HIS-specific qDEPR analyses. (Green: known, Blue: novel)

| **2df joint P-value** | | |
| --- | --- | --- |
| DBP |  | λ = 1.00  Ffdfdsfdsλsffdsfdfkl;jjkfldsfds |
| SBP |  | λ = 0.97 |
| PP |  | λ = 0.99 |
| **1df Interaction P-value** | | |
| DBP |  | λ = 0.99 |
| SBP |  | λ = 0.99 |
| PP |  | λ = 0.99 |
